# Supplementary material for: Predicting central lymph node metastasis in patients with papillary thyroid carcinoma based on ultrasound radiomic and morphological features analysis
Source: BMC Med Imaging. 2023 Aug 24;23:111. doi: 10.1186/s12880-023-01085-4 (PMC10463837; doi:10.1186/s12880-023-01085-4)
Supplement: Supplementary file 2 — Supplementary Material 2 [file 12880_2023_1085_MOESM2_ESM.csv]

id	Grade	group	original_shape2D_Elongation	original_shape2D_MajorAxisLength	original_shape2D_MaximumDiameter	original_shape2D_MeshSurface	original_shape2D_MinorAxisLength	original_shape2D_Perimeter	original_shape2D_PerimeterSurfaceRatio	original_shape2D_PixelSurface	original_shape2D_Sphericity	original_firstorder_10Percentile	original_firstorder_90Percentile	original_firstorder_Energy	original_firstorder_Entropy	original_firstorder_InterquartileRange	original_firstorder_Kurtosis	original_firstorder_Maximum	original_firstorder_MeanAbsoluteDeviation	original_firstorder_Mean	original_firstorder_Median	original_firstorder_Minimum	original_firstorder_Range	original_firstorder_RobustMeanAbsoluteDeviation	original_firstorder_RootMeanSquared	original_firstorder_Skewness	original_firstorder_TotalEnergy	original_firstorder_Uniformity	original_firstorder_Variance	original_glcm_Autocorrelation	original_glcm_JointAverage	original_glcm_ClusterProminence	original_glcm_ClusterShade	original_glcm_ClusterTendency	original_glcm_Contrast	original_glcm_Correlation	original_glcm_DifferenceAverage	original_glcm_DifferenceEntropy	original_glcm_DifferenceVariance	original_glcm_JointEnergy	original_glcm_JointEntropy	original_glcm_Imc1	original_glcm_Imc2	original_glcm_Idm	original_glcm_Idmn	original_glcm_Id	original_glcm_Idn	original_glcm_InverseVariance	original_glcm_MaximumProbability
A001	A	1	0.80544333	299.8448995	312.409987	50922	241.5080744	1021.719913	0.020064411	50924	0.782935167	-1.754663311	117.3932734	1616903593	5.175274941	67.58579178	2.741757183	252.6055415	37.62354328	53.43211468	47.87730768	-50.57408112	303.1796227	27.58586607	356.3779325	0.47382726	6467614373	0.031311132	2090.971096	558.3361193	22.06948207	250536.7691	2455.666793	307.9701907	22.87733363	0.861645311	3.64678148	3.324748784	8.977281465	0.002282345	9.250170371	-0.209537155	0.930103285	0.249329406	0.994178415	0.339215045	0.946436308	0.257988367	0.006195152
A002	A	1	0.54269137	268.6693415	274.3720102	29550	145.8045329	748.783838	0.025339555	29552	0.813817853	-6.254159695	97.20732726	881327392.9	5.047265821	53.66690754	6.371963291	341.768488	33.63859187	42.42235858	35.35925056	-51.92329972	393.6917877	21.9550608	345.3863668	1.352131179	3525309571	0.036936498	2038.670746	455.4186245	19.79027671	519821.9743	6520.930115	285.610946	30.56152707	0.806589964	4.065330292	3.485257104	13.21390888	0.002655922	9.141679388	-0.181388041	0.899975233	0.235207167	0.995346664	0.325275924	0.953392421	0.243177214	0.007249544
A005	A	1	0.674525566	153.6407204	170.2938637	12178	103.634594	492.6173157	0.040451414	12180	0.794114715	71.2920206	178.9947031	556351379.1	5.17385682	55.29003912	4.203032388	325.2138775	34.87205524	124.993184	123.5640384	-12.91111165	338.1249892	23.06127792	427.4456837	0.612583307	2225405517	0.033923873	2090.606109	869.5718581	28.43329025	349945.5275	2841.252694	290.4772911	45.99812199	0.726607777	5.020308836	3.769378369	19.56200861	0.002060736	9.444423024	-0.175108254	0.90238738	0.195682975	0.990761937	0.287920263	0.935403418	0.198198455	0.006257319
A007	A	1	0.610631875	132.784239	132.9661611	8274	81.08228881	374.5929291	0.045273499	8276	0.860801698	13.8263046	209.0709503	344358934.9	5.807529674	108.0632911	4.610337017	511.0620565	64.31661342	99.74068241	80.96943335	-33.34160881	544.4036653	44.78121055	407.9673736	1.156391117	1377435740	0.021313266	6644.764752	983.3464305	27.4394848	4189351.688	34143.84504	1000.152771	78.48025264	0.854721695	6.208166931	4.072813122	38.17460877	0.001357384	10.0077918	-0.278461039	0.97826037	0.175551565	0.993778558	0.264895812	0.949094935	0.181804463	0.004492012
A011	A	1	0.775697581	82.30709662	85.90692638	4008	63.84541571	260.9360749	0.065103811	4012	0.860071711	21.62071883	98.53492045	128824153.5	4.546231448	36.57208553	7.938574789	259.0934149	24.46741411	56.75267992	52.18095587	-4.45335259	263.5467675	15.12685153	358.383645	1.635674054	515296613.9	0.053012448	1166.362343	193.3668733	12.73801538	208512.8707	3602.232107	156.0971718	31.66275964	0.663345158	4.209943459	3.493056365	12.97454067	0.004431049	8.292427709	-0.171828426	0.874729672	0.221805659	0.989295859	0.313710623	0.929996605	0.231200601	0.014491806
A013	A	1	0.830762711	129.8100106	151.4331536	10206	107.8413163	448.8183259	0.043975928	10208	0.797925111	-14.07324003	70.23156135	268866775.6	4.657135569	38.73676152	6.19298256	218.6346205	26.93773427	22.51586493	15.0461103	-42.84568191	261.4803024	16.89173147	324.5848419	1.510233281	1075467103	0.050208024	1338.83647	225.4297988	13.6476645	210003.0778	3769.083644	175.8440669	19.18427076	0.802153615	3.302139173	3.206451844	7.919698353	0.004709089	8.332236705	-0.187778343	0.896090688	0.267874636	0.993377789	0.357515802	0.943634505	0.270385862	0.013290581
A015	A	1	0.870956722	133.7160375	146.6969666	11986	116.4608817	448.1320344	0.037387955	11988	0.866036265	-1.561898103	95.06242254	354417428	4.884800118	50.71467115	4.39532455	243.0992481	31.23752774	41.54734393	33.37616769	-42.68041133	285.7796594	21.26784953	343.885737	1.073758883	1417669712	0.040892522	1602.811935	355.6653951	17.5720161	205872.785	3469.537289	215.8339938	28.28094067	0.768199254	4.010402242	3.463105321	11.48603165	0.003129282	8.872669983	-0.172048226	0.886565121	0.235039292	0.991878445	0.325326325	0.938088248	0.240754833	0.009040976
A016	A	1	0.718298534	128.6878992	134.4023809	8926	92.43632934	413.9066376	0.046370898	8928	0.809153622	41.11254758	135.9335113	340502027.2	4.933070626	48.08820421	7.361977756	349.601394	30.41710073	88.42562119	84.37425713	-5.814608524	355.4160025	20.04622432	390.5824774	1.296312544	1362008109	0.039463859	1680.208472	453.8924526	20.0673631	421417.5896	4933.628648	235.7076917	30.93854172	0.767963052	4.204107219	3.516680668	12.6829543	0.002813947	8.92508662	-0.183979296	0.906017956	0.218522298	0.994200209	0.310931824	0.946836279	0.229882846	0.007240588
A017	A	1	0.856510154	82.63385684	85.27602242	4526	70.77673743	262.9949494	0.058107589	4528	0.906806863	38.42263523	111.2055123	158699398.7	4.526946383	36.59907135	3.311960565	184.168235	22.39253494	73.32678735	71.43267376	-11.55315851	195.7213935	15.16085853	374.4246454	0.375944038	634797594.8	0.051798624	820.9249631	340.6128085	17.93141654	34816.58984	327.9591728	100.129258	23.8302039	0.615036803	3.779458347	3.345230433	8.946281917	0.004317904	8.309467346	-0.15062897	0.845270072	0.233566978	0.985836501	0.326182094	0.917905998	0.244168965	0.013140853
A018	A	1	0.737198247	101.2841172	100.9752445	5506	74.66647366	310.8772004	0.056461533	5508	0.846124291	25.95981194	169.5182009	215529421.9	5.412718119	75.60352334	4.452620096	381.8848002	45.56202947	91.29822151	80.7147746	-13.67248954	395.5572897	30.91129922	395.6273544	0.999599118	862117687.6	0.027965924	3406.705401	587.8922698	21.79465224	1037817.25	10787.0823	501.0539566	49.51607275	0.820184648	5.157413009	3.791563885	21.84358303	0.001957841	9.434255568	-0.257278118	0.965248945	0.189268165	0.992604458	0.281508839	0.942116047	0.198483055	0.00728418
A019	A	1	0.434720759	164.9427442	174.183811	9050	71.70403497	433.019336	0.04784744	9052	0.778792807	29.78202155	111.4476429	312529325.5	4.70440951	40.30740508	5.034050238	275.6173467	25.36351431	70.12745686	68.35485609	-24.73322663	300.3505733	16.94855584	371.6234496	0.737059144	1250117302	0.046052181	1109.653983	403.1050728	19.35246733	100741.4822	1192.49249	144.0321484	29.69744637	0.656724751	4.081797793	3.462625893	12.17373542	0.003411134	8.686693998	-0.147178382	0.840680928	0.228100537	0.99232828	0.319743317	0.939929187	0.235122074	0.010974839
A021	A	1	0.539041432	215.8737036	216.0925728	19278	116.3648704	605.3868684	0.031402991	19280	0.813023172	-22.81157852	121.445304	591735205.2	5.451653733	76.88484544	5.729236234	422.8048991	46.78900607	45.05795926	34.94211582	-61.37521775	484.1801169	31.99759477	350.3807074	1.253033837	2366940821	0.026963293	3701.644842	623.9354955	22.35966161	1550739.479	14819.24873	544.7762905	48.86812104	0.835186038	4.683916328	3.685627248	25.50431085	0.001968097	9.596150635	-0.237940622	0.952991077	0.233248117	0.995155759	0.320345171	0.95653157	0.235577474	0.006519646
A025	A	1	0.879239613	134.0145699	141.2232276	12114	117.8309185	438.6761902	0.036212332	12116	0.889415418	17.3595491	186.5257242	471798837.7	5.565545246	88.6821937	3.965937421	419.7272398	54.05168029	88.79770863	71.93451882	-22.80454699	442.5317868	37.70847576	394.6651663	1.055317315	1887195351	0.025394119	4596.935255	705.051924	23.14045099	1905420.729	19720.62219	711.5003541	33.21549724	0.910842586	4.199566518	3.54218701	14.80211245	0.00202016	9.544946267	-0.284137573	0.975952456	0.232687108	0.995901843	0.322203213	0.95653075	0.240940001	0.007157479
A028	A	1	0.599198935	121.2956149	125.8729518	6374	72.68020325	383.8477631	0.06022086	6376	0.737313095	59.1534388	129.5450241	250838354.8	4.47185281	39.22702753	4.061653368	243.8237748	22.39594275	95.69321378	97.22524059	17.56766338	226.2561114	16.01345279	396.6914255	0.470748027	1003353419	0.05240165	790.9676226	295.2653838	16.51329953	37930.67052	303.3379856	104.6389585	14.34055439	0.757626259	2.882960013	3.022658429	5.712216856	0.005232416	8.015567537	-0.192901576	0.893578009	0.299229477	0.993394292	0.385280183	0.943263946	0.295188638	0.015575055
A030	A	1	0.854768085	159.7263654	166.0120478	16962	136.5289995	535.2447327	0.03155552	16964	0.862563465	6.458786198	118.0520558	542091848.8	5.026574179	57.60308558	3.569149316	245.42495	34.71390837	54.85404123	45.64141132	-31.18690597	276.611856	24.05736082	357.521614	0.886396972	2168367395	0.03660425	1900.313933	396.3989989	18.33134983	248055.2964	3811.991902	268.4585083	27.02541528	0.816314687	3.813770317	3.396150922	11.68041761	0.002870607	9.015640564	-0.198660163	0.914492354	0.249493257	0.992042447	0.338701861	0.940160724	0.251776901	0.008556695
A032	A	1	0.895474944	92.90437032	93.74433316	6022	83.19353578	300.7350647	0.0499394	6024	0.914726454	33.61039993	140.1199669	222957639.1	5.034770735	60.34861463	3.124545991	253.8296006	34.50648491	82.43904746	76.04487558	-16.73056696	270.5601675	24.9696072	384.7677755	0.568908896	891830556.2	0.035451818	1786.616053	474.3585714	20.59451409	179644.8121	2205.040336	237.3334172	36.44556429	0.733329316	4.584002186	3.642741841	14.58952561	0.002486458	9.077654896	-0.185176684	0.910204345	0.212316501	0.988475164	0.302864893	0.926794798	0.216397371	0.007836768
A035	A	1	0.583491403	161.1127806	169.7998822	11314	94.00792243	480.6173157	0.042479876	11316	0.784537317	-20.45801534	63.0271162	289740239.5	4.685096739	44.87943014	3.470662859	158.0387547	26.31090058	18.31159812	14.72847693	-66.03304096	224.0717956	18.48016226	320.0279678	0.707663933	1158960958	0.045223304	1095.626648	352.5350209	17.89354295	74728.76963	1269.64569	147.7168217	18.3095318	0.778816441	3.289291091	3.189452483	7.109009759	0.003884077	8.46838641	-0.178528263	0.887284218	0.266440808	0.991609627	0.356616367	0.935975002	0.265291554	0.010391936
A036	A	1	0.841098854	72.74567124	77.82030583	3378	61.18630075	233.5391052	0.069135318	3380	0.882216432	40.21659378	157.1403425	130453219.8	5.093683612	53.13154464	4.133126524	276.7624825	35.54929903	90.16426797	81.7290712	-3.353508525	280.115991	23.25631487	392.9153963	0.947890135	521812879.4	0.036271839	2154.352682	443.7869516	19.36032505	410065.1044	5734.073806	310.6855653	34.84349513	0.798508675	4.470895651	3.614502763	14.29737109	0.002922292	8.85408527	-0.255270118	0.960286931	0.214731454	0.989718016	0.306367642	0.930642746	0.213301795	0.012462681
A037	A	1	0.554091893	147.7225876	162.5053845	8474	81.85188825	476.3330445	0.056211122	8476	0.685075523	83.20489556	226.7767141	443849971.1	5.497172422	71.2245219	3.681429909	372.4196041	44.83365032	153.9837818	149.6234402	16.2133292	356.2062749	30.03362978	457.6701834	0.622458472	1775399885	0.026383241	3360.722596	899.6232558	28.23871096	841310.4072	6068.956271	476.0757931	67.28575464	0.752442849	6.138296265	4.034115068	27.78168668	0.001420504	9.872065071	-0.206620017	0.940734006	0.165500556	0.987707916	0.2555297	0.925515924	0.171105979	0.004793642
A039	A	1	0.713192342	215.4685266	223.5799633	25282	153.6705031	666.0731599	0.026345746	25284	0.846230573	16.75974082	118.5484892	862598296	5.049689731	53.79992617	16.69587984	562.5463258	33.14201438	66.54685315	62.8855472	-32.63264581	595.1789716	22.0827651	369.4123435	2.091536706	3450393184	0.036260581	2108.883953	495.8842812	20.72239544	1474971.199	10389.21093	296.4789135	30.62560898	0.811697882	3.951569877	3.441472122	14.36782591	0.002590361	9.115134064	-0.189610419	0.911169802	0.237453251	0.997937453	0.328423997	0.968975638	0.245024265	0.007011843
A040	A	1	0.857062468	59.43307955	62.12889827	2362	50.93786184	182.7106781	0.077354224	2364	0.942933248	41.50380082	115.1104047	83822341.04	4.537397866	35.27925297	4.426960691	215.4742324	23.02174297	75.37698392	71.77614862	-4.163907413	219.6381398	14.96665517	376.6050615	0.799495145	335289364.2	0.052905827	923.4922658	281.3298136	16.16716412	51186.91766	868.0757782	106.4579051	26.6744523	0.597217275	4.013708251	3.406114292	9.907183425	0.004716016	8.131844528	-0.183002577	0.888544857	0.221492403	0.987376822	0.314176638	0.921900155	0.238378205	0.014530848
A041	A	1	0.77434682	199.890413	199.218473	24050	154.7845058	596.901587	0.024819193	24052	0.92100023	12.05615768	139.4186992	835756460.3	5.249641192	67.51672589	6.207807217	411.2073143	40.99835568	68.99756276	59.16114396	-29.42093887	440.6282532	28.03087645	372.8157654	1.313709724	3343025841	0.03122192	2832.393614	500.5705437	20.11635154	839237.5672	9680.079631	408.1299242	24.5337593	0.885569716	3.677683222	3.32711188	10.33249495	0.002355867	9.233895932	-0.235628793	0.94888073	0.248324946	0.996965047	0.33880076	0.961464526	0.255121786	0.006200167
A042	A	1	0.79969614	219.0917553	239.0983061	28794	175.2068311	701.3036072	0.024355894	28796	0.857728537	9.346212499	108.4269976	918356013.4	4.949051359	52.0296027	4.304833206	258.4938299	31.51125919	54.85920256	48.4506393	-29.36963638	287.8634663	21.43325814	357.1654574	0.95467459	3673424054	0.038542013	1642.110322	353.4944835	17.29358	246794.616	3547.216942	237.3346792	19.63648337	0.846930957	3.286634631	3.209311266	8.380027043	0.003284199	8.818093425	-0.211144656	0.925387584	0.275908993	0.994325559	0.363119594	0.948438976	0.282022553	0.008495189
A043 _1	A	1	0.629842814	265.1934762	272.6829661	34474	167.0302052	735.8965363	0.021346422	34476	0.894404575	19.77594497	157.4309606	1354602719	5.48841692	61.51217008	8.100796519	490.4526676	44.40639142	91.3176668	85.30032033	-41.56036341	532.013031	26.4727709	396.4400581	1.510855106	5418410876	0.028730604	4035.203344	918.2052879	27.7560906	3008915.227	22701.54673	620.3359242	29.11738454	0.910326966	3.581289401	3.314423963	15.46893338	0.002438769	9.374851766	-0.292021457	0.975012636	0.279110596	0.997581007	0.363870695	0.969038523	0.283214831	0.006402587
A043	A	1	0.856564197	183.9002631	198.8064385	22038	157.5223811	608.1320344	0.027594702	22040	0.865352674	-27.56627709	130.0714829	646978760.9	5.358485579	76.24822406	5.579917068	352.143223	52.08219633	35.59118569	14.015821	-50.2026191	402.3458421	33.08042484	342.6645778	1.605006585	2587915044	0.032321501	4797.568953	526.5993119	18.47643129	3186338.692	33724.42673	754.9520225	14.0712711	0.963389454	2.587730937	2.930654323	7.057037951	0.004457491	8.744962284	-0.363798967	0.988087122	0.354060839	0.997938229	0.42847683	0.970341556	0.34668616	0.01555163
A044	A	1	0.39862399	140.3593466	138.9244399	6070	55.95060277	339.4802307	0.05592755	6072	0.813551011	59.52800727	146.3729517	243986158	4.746813417	49.05676482	2.933415274	240.16473	27.99714025	99.45039193	94.859897	7.941248105	232.2234819	20.37744855	400.9098332	0.514451989	975944632	0.042652856	1168.078728	397.6943934	19.12856225	73305.11347	1047.002013	155.7140491	28.58189271	0.688934557	4.014315871	3.43310839	11.47235805	0.003429807	8.640653711	-0.172667313	0.876430655	0.234181331	0.988197873	0.324407008	0.926727505	0.245086259	0.010285966
A045	A	1	0.760453472	121.0608188	137.53545	7902	92.06112	442.6761902	0.056020778	7904	0.711848019	3.216669389	106.676139	250948162.3	4.953852105	55.22884162	2.666308633	202.1456834	31.35455144	54.2743182	54.9578455	-55.44175322	257.5874366	22.60875511	356.3678687	0.102727508	1003792649	0.036256433	1487.765333	574.9398934	22.96801113	108712.8393	32.71580363	208.6492774	19.03261898	0.832591327	3.312879781	3.197321194	7.553239786	0.003129583	8.713437336	-0.230190489	0.938648539	0.270459971	0.99339448	0.358482109	0.94342537	0.276849297	0.007776073
A046	A	1	0.79831583	107.5739047	118.8780888	6966	85.87795102	377.7056275	0.054221307	6968	0.783327208	46.90848253	129.8057492	265600372.6	4.710150205	43.1054628	3.195574604	240.7532972	25.8222748	89.1323719	88.41842996	-3.393152689	244.1464498	18.08665078	390.4723306	0.192058113	1062401490	0.044447242	1044.6381	390.6815976	19.05269185	52168.7585	67.54945821	135.2108211	24.51615815	0.692141938	3.808388345	3.359358175	9.353147999	0.003374924	8.612908326	-0.160557444	0.863820611	0.234582937	0.990540264	0.327053279	0.932228394	0.241081966	0.008504522
A046_1	A	1	0.845398647	99.78634805	100.6578363	6574	84.35924363	308.4507935	0.046919804	6576	0.931823996	-5.519962963	56.9228258	172366584.2	4.275304858	34.38324905	6.012186711	200.283916	20.5073368	22.71144918	17.79040646	-32.11175766	232.3956737	13.9152855	323.7990953	1.237878013	689466336.9	0.062544769	703.1747111	156.588154	11.80612326	46631.61762	1082.954678	86.65101827	17.84532393	0.657049571	3.216968987	3.150291811	7.111009443	0.006052958	7.875304139	-0.138199823	0.81084447	0.270355574	0.99249929	0.360068408	0.939686417	0.274149877	0.016679513
A047	A	1	0.740300597	110.8510439	119.6829144	6826	82.06309394	357.7056275	0.052403403	6828	0.818770716	28.25474319	159.8510608	259757320.9	5.269719792	61.56915736	5.235961965	327.4713866	40.70724542	86.30477978	75.69451592	-22.04001765	349.5114043	26.17931871	390.0920842	1.284057204	1039029283	0.0317199	2940.451245	609.8589985	22.58674557	1007608.237	12243.43051	433.2286058	34.44357827	0.852387281	4.431194249	3.552773582	13.64579668	0.00233682	9.184821798	-0.251450243	0.958288177	0.209979012	0.993365171	0.302472275	0.943535978	0.222492461	0.006161499
A048	A	1	0.815064929	167.4456727	169.1981087	16746	136.4790954	541.1025971	0.032312349	16748	0.847775491	-12.47938613	85.51218289	472074349	4.945948086	48.30317106	12.99139247	490.7723401	31.19458262	33.08761229	27.08044016	-53.2842321	544.0565722	20.5394306	335.7791466	1.815399374	1888297396	0.039408261	1800.27785	371.5020317	17.86413771	613108.7756	5953.582571	239.7779986	30.29467616	0.773839118	3.923310017	3.423250969	14.02682479	0.002988022	8.930852353	-0.183284383	0.896452351	0.244735199	0.997567049	0.333937992	0.966571704	0.25283553	0.007272634
A049	A	1	0.322009936	213.7040623	214.5972973	11402	68.81483146	509.2203461	0.044660616	11404	0.743343764	-12.68159162	49.40244251	287720645.3	4.340886352	31.54077836	5.067724418	163.6138199	20.13273575	16.56945672	13.47826568	-47.64853995	211.2623598	13.29485837	317.6778276	1.028336075	1150882581	0.06040045	702.9812206	206.4182097	13.70243299	43045.73547	918.7814572	92.74344767	18.10270416	0.672142099	3.159738417	3.131785605	7.569819141	0.005724495	8.031533142	-0.144218603	0.811398929	0.283431673	0.990660003	0.370472219	0.934781273	0.284148571	0.014778544
A050	A	1	0.663498435	65.09317347	70.34202158	2022	43.18921872	195.1959595	0.096536083	2024	0.816628785	97.04750357	185.8533036	98423411.29	4.804897517	45.33127335	8.737156519	395.7826815	29.82254352	139.1481983	133.3757612	50.12858953	345.654092	19.41861239	441.0359062	1.592224528	393693645.1	0.043150182	1661.530456	365.7748803	18.12409676	404269.6395	5352.749191	203.9597278	54.80451522	0.576344317	5.618273459	3.859652691	22.14609144	0.003395973	8.506069524	-0.217618232	0.932733433	0.168177794	0.989355824	0.260759715	0.929133717	0.178094555	0.01117275
A051	A	1	0.902585903	291.8721722	321.1790778	52822	263.4397081	1085.754401	0.020554966	52824	0.750379143	6.05013042	106.5841313	1694664371	4.992472399	51.54030706	3.583473887	274.007858	31.19105378	56.04685561	54.04349823	-41.90508567	315.9129437	21.73799191	358.225257	0.484925456	6778657484	0.036577002	1555.971378	471.4213082	20.60203344	160849.5357	1286.071254	216.5146843	28.60939789	0.765894119	4.045145273	3.460977525	11.44538755	0.002403537	9.171096405	-0.159202355	0.870032421	0.229739381	0.993223518	0.320936021	0.942870979	0.237584189	0.005658093
A052	A	1	0.576212043	427.9591716	432.4534657	82098	246.5952286	1176.34733	0.014328575	82100	0.86344693	23.65840081	113.8643769	2831671253	4.878266849	46.59636695	4.318316233	336.5490652	28.4046502	69.62411879	68.15229789	-39.51645422	376.0655194	19.37531454	371.4324415	0.575489949	11326685010	0.040385524	1340.069398	544.7895146	22.41515991	150346.3372	1326.408595	191.6246709	22.22469418	0.792106703	3.500122376	3.286862963	9.412661936	0.003083574	8.893798948	-0.175808729	0.887574497	0.26172215	0.996227592	0.350603798	0.957387589	0.26731678	0.00698778
A053	A	1	0.935507724	80.57973408	88.58893836	4666	75.38296366	292.9360749	0.062780985	4668	0.826617207	38.55403127	143.4337989	174620618	4.987378663	50.44073905	4.346951801	304.4960174	33.06717311	84.42802343	76.55749282	-6.856079786	311.3520972	21.9625258	386.8230389	1.005751446	698482471.9	0.038215302	1847.158194	407.7693525	18.91892778	248914.3161	3827.84302	235.5384343	36.19924059	0.732642742	4.620519861	3.63505032	14.09160998	0.002816798	8.900462212	-0.194631598	0.916811812	0.203070487	0.991176482	0.295568323	0.934506746	0.208188777	0.009308496
A054	A	1	0.822303708	187.0838994	214.7556751	21906	153.8397841	668.2985566	0.030507558	21908	0.785083682	30.54311231	114.6308155	749091946.7	4.724217772	42.02117708	3.580303674	240.2918995	26.19593835	68.30483022	63.48724114	-18.74364341	259.035543	17.72367972	369.8249384	0.66621962	2996367787	0.045699531	1122.037096	354.4926607	17.95927645	80545.57084	1215.935627	149.8293505	22.00559769	0.743318688	3.566199281	3.296450819	8.749224793	0.003611014	8.674206653	-0.152657557	0.851906693	0.252440474	0.992411641	0.342738491	0.939495296	0.258432148	0.009606579
A055	A	1	0.821686168	130.7129333	134.3726163	9522	107.4050093	472.6173157	0.049634249	9524	0.731912883	61.59775816	163.3940746	401725969.6	4.979617569	49.48172418	4.2182711	305.351946	31.18036447	108.749835	104.8080348	9.336272355	296.0156736	20.8376891	410.7572675	0.785167968	1606903879	0.038347297	1645.10523	498.378384	21.19123764	221790.1264	2702.008365	229.3829513	32.14928018	0.753966084	4.300692581	3.565620142	12.94477337	0.002630635	9.07371277	-0.176127023	0.89840255	0.223243781	0.991638595	0.314142279	0.936940389	0.222722457	0.007944361
A056	A	1	0.664859499	382.2083265	390.9475668	75698	254.1148365	1121.435642	0.014814601	75704	0.869706628	-33.51408836	120.5506532	2175333582	5.487905626	78.79988166	4.46075485	389.8897251	48.63132774	33.28024929	19.81551075	-75.17544094	465.065166	33.34198472	339.0263971	1.118949417	8701334328	0.026711966	3863.173348	680.3246432	23.18236564	1546544.711	16072.40487	596.4984628	24.88918153	0.919927498	3.660969791	3.353853644	10.76355075	0.002116264	9.534739534	-0.263361578	0.965994346	0.260882531	0.997223491	0.348389376	0.963609086	0.26394617	0.005498345
A057	A	1	0.752412421	99.89812231	110.0545319	5538	75.16458808	317.9066376	0.057404593	5540	0.829816015	-11.15709833	84.43992187	153947251.8	4.790466295	53.21163121	2.88350111	154.8767307	30.06597465	31.35558471	25.93251792	-45.31396955	200.1907003	21.81276138	333.3965363	0.663225973	615789007.4	0.041771429	1356.726911	310.088307	16.36864214	100620.1168	1796.434287	186.7163999	18.11665515	0.822257133	3.251856481	3.161407598	7.079245655	0.004089266	8.411913264	-0.226728359	0.932177752	0.271712676	0.989641424	0.360259229	0.92984532	0.275940814	0.014296637
A059	A	1	0.764336589	102.29828	104.8618138	5882	78.19031839	360.7350647	0.061328641	5884	0.753666276	45.19505654	153.3421037	234843666.8	5.117289525	58.18865344	3.411892398	260.3523439	34.59632696	97.15423751	92.01803182	-29.41829287	289.7706368	23.75478845	399.5609987	0.505726293	939374667.1	0.034315368	1917.503322	710.1963709	25.63149881	222943.4653	1734.765187	257.6811671	44.80540083	0.703311251	4.915049873	3.73592953	19.39684631	0.002367745	9.183419009	-0.199259281	0.923329934	0.204920548	0.98787112	0.295463014	0.927305518	0.209320346	0.007462452
B001	B	0	0.640966472	99.92894456	102.9563014	4902	64.05110304	303.0782105	0.06182746	4904	0.818911314	25.34361384	148.1408906	187247973.4	5.180373495	70.09555741	2.591577996	248.258816	38.75210116	88.00414818	87.80388563	-6.749537895	255.0083539	28.83208003	390.8078944	0.273178523	748991893.7	0.030615884	2183.591305	459.2483339	19.74384457	224131.011	1110.269748	309.076199	31.37434794	0.81581575	4.210728332	3.515838832	12.86241127	0.002415322	9.041727929	-0.247228295	0.956142801	0.224879828	0.988930432	0.316141356	0.928762976	0.230281057	0.007253543
B002	B	0	0.452964808	181.008972	178.9972067	11238	81.99069419	467.8477631	0.041630874	11240	0.803239188	32.91895713	145.1475294	411810867.8	5.053656902	56.06378822	4.579315564	282.1597464	36.15322395	79.92656261	68.04563544	-18.27992993	300.4396763	23.66743736	382.8209898	1.208019895	1647243471	0.038105394	2207.717273	484.6198441	20.39454476	444291.6352	6839.986333	314.7445491	40.02131415	0.774370367	4.596049014	3.671512921	17.87936146	0.002871438	9.13220922	-0.190378723	0.912586252	0.222980588	0.989776496	0.311954318	0.93363814	0.225357245	0.008929693
B003	B	0	0.542010059	81.46702819	74.40430095	2422	44.15594874	231.6812409	0.095656995	2424	0.753010671	-8.428741069	56.53970587	64043124.85	4.333541912	32.20179245	3.227583807	111.8941293	19.58330845	24.13006701	23.55128476	-44.95146406	156.8455933	13.46129146	325.0872562	0.258804923	256172499.4	0.058235031	621.4238255	210.6673559	14.02590541	18170.21952	143.6829302	74.9569645	19.20528037	0.591140117	3.415204915	3.181178513	6.983912457	0.005460932	7.871766746	-0.16791216	0.858976429	0.252691493	0.982311013	0.34310824	0.908638555	0.271818602	0.013733122
B004	B	0	0.756290322	50.9827411	54.40588203	1510	38.55775369	161.3380951	0.106846421	1512	0.853800649	75.78471434	160.8297358	65954470.93	4.619651948	43.79561382	2.56492837	198.0877728	25.84827921	116.5061724	112.8155753	38.13119814	159.9565747	18.57794469	417.7112966	0.309010742	263817883.7	0.046247306	1005.335683	289.8592829	16.35332422	38720.55161	332.2242737	121.3196756	31.6243318	0.58586247	4.333707518	3.525210136	12.12120799	0.004561732	8.104847438	-0.231394432	0.933724956	0.2207206	0.973344013	0.311345686	0.891478571	0.222146863	0.015732952
B005	B	0	0.842836664	104.8612715	109.4166349	7176	88.38092423	337.9066376	0.047088439	7180	0.888688222	3.491366829	111.8311154	221244267.3	4.930612328	51.21597899	5.782013011	313.7722183	33.03714268	48.42315678	38.97679054	-28.95248298	342.7247013	22.13017349	351.0781383	1.294066989	884977069.2	0.039819368	1857.16304	299.4742531	15.7517395	279860.0566	4417.164211	236.1047515	30.70260832	0.767795423	4.193875069	3.509886341	12.42835115	0.003054985	8.844825515	-0.185904163	0.905360375	0.22003534	0.993732216	0.312086149	0.944852458	0.231681714	0.008797981
B006	B	0	0.709652468	36.42266257	37.73592453	730	25.8474324	104.0832611	0.14257981	732	0.92020687	85.54807041	148.4985485	31532304.11	4.237098703	32.03028509	2.877511625	180.6521396	19.5096839	114.3757094	111.8238259	65.49284919	115.1592904	13.46457218	415.0995938	0.53023391	126129216.4	0.061243991	600.4442103	109.4224487	9.934170557	14287.67138	384.6988873	66.86772944	23.95822482	0.468573531	3.798887385	3.300907315	9.030270812	0.007859775	7.281758531	-0.256823351	0.936998243	0.233670782	0.963075341	0.325861027	0.873108802	0.246392853	0.022055153
B008	B	0	0.621952182	79.61279176	80.52328856	3046	49.51534953	220.3675324	0.072346531	3048	0.88781458	4.999201635	103.5319376	94986649.79	4.82986273	47.71971849	3.179055903	175.7327998	29.73987835	51.01266025	46.88890771	-22.63914877	198.3719486	20.28556845	353.0642945	0.653000483	379946599.2	0.042284085	1444.508394	275.4640101	15.36243668	114306.356	1656.857247	189.4563661	31.6398418	0.713904768	4.252840417	3.521413565	12.75982707	0.00368205	8.53141611	-0.220688942	0.932652323	0.220992293	0.982458865	0.312891607	0.911478315	0.226361631	0.011597455
B009	B	0	0.922413425	91.65242109	103.247276	5882	84.54142366	313.7056275	0.053333157	5884	0.866652776	-10.44248538	65.14906248	154006065.6	4.460310202	34.3658094	4.211440536	141.5315784	23.28830457	22.13011526	15.76242923	-38.85400005	180.3855785	15.0082464	323.565774	1.103696261	616024262.5	0.056510159	926.998922	185.5120677	12.63699786	65541.85078	1628.748754	119.9601871	16.69895325	0.754068526	3.144839073	3.115422609	6.401084012	0.005591528	8.03848793	-0.176554078	0.874485784	0.275587736	0.98830765	0.36395461	0.92530439	0.283186533	0.01713796
B010	B	0	0.836221125	83.4712355	91.38927727	4250	69.80041045	287.9655121	0.067756591	4252	0.802525644	-7.658843629	76.88449831	116062525.1	4.592846357	43.12395417	3.105147912	162.1215442	26.16694186	28.81822954	21.53619703	-38.66381771	200.7853619	18.43779737	330.4299276	0.755691979	464250100.4	0.049260643	1062.508985	226.4171386	13.93338166	63063.8559	1365.733774	143.5999224	14.51574206	0.816113281	2.892575748	3.02696803	5.899155684	0.00536835	8.053206955	-0.22696381	0.928491793	0.296534981	0.991653591	0.382241614	0.936880836	0.304013786	0.017807816
B012	B	0	0.736637155	89.3109398	102.1763182	4334	65.78975664	311.0782105	0.071776237	4336	0.750204722	63.27824797	154.8309231	180760349.7	4.780026352	50.23291766	2.848596878	235.5140429	28.13255147	106.8811457	104.5154535	26.01388332	209.5001596	20.24387545	408.3541234	0.353418465	723041398.7	0.04125931	1200.823418	311.1144709	16.72047006	67700.38754	609.2873676	156.5738827	30.42551367	0.67371176	4.219177981	3.496436285	11.72380145	0.003141039	8.686710321	-0.176507554	0.888073971	0.217859565	0.984459784	0.310838069	0.915406941	0.223479656	0.009350335
B013	B	0	0.904794906	128.258958	147.3227749	10906	116.0480518	457.5046174	0.041949809	10908	0.809174517	-17.95822082	74.79969954	287981429.7	4.803327599	47.00029607	3.931514233	194.8130236	29.47737306	22.77441365	15.49543241	-56.17698088	250.9900044	19.98645241	324.967308	0.972012767	1151925719	0.043175923	1420.429173	330.1596101	16.84909807	160558.6369	2894.832506	201.5540677	16.49697928	0.848073753	3.116729922	3.113168302	6.392612784	0.003939083	8.515589983	-0.216755856	0.925365275	0.279704429	0.993801976	0.367781635	0.944476875	0.2814584	0.011616863
B016	B	0	0.73005353	84.72015864	89.84430978	4006	61.85025084	253.137085	0.063189487	4008	0.886348736	43.01249752	100.6375409	139263513.8	4.25259074	31.6801354	5.634031728	213.6081567	18.84199251	72.00158399	70.48027045	8.352118685	205.256038	12.85366606	372.8076483	0.852368478	557054055	0.061953936	600.3641761	204.5057377	13.87018392	30412.07574	546.2174249	71.67540505	23.18100118	0.510617168	3.596843493	3.280557124	9.61254781	0.005438118	7.92727658	-0.13098876	0.793995925	0.248188498	0.987715425	0.340008989	0.925162659	0.253063313	0.013204919
B017	B	0	0.548976859	95.41204308	95.70788891	3854	52.37900369	253.8233765	0.065859724	3856	0.867020109	-36.14808313	41.30746561	88525331.97	4.605551431	38.07941611	8.01158551	197.5536028	25.90321705	0.863659362	-5.02365372	-58.95883879	256.5124416	16.00310133	303.0367259	1.751153418	354101327.9	0.051105353	1312.315703	196.1947809	12.53965024	259953.2712	4268.704503	183.3540777	27.55161316	0.738741753	3.609457729	3.327013525	13.83966687	0.005037624	8.144265842	-0.227640638	0.929488999	0.275424848	0.990490491	0.36109067	0.938918252	0.276083869	0.014160885
B018	B	0	0.916245576	75.08279268	84.59314393	3930	68.79427661	258.1076477	0.065676246	3932	0.860994415	56.73959137	122.3750026	148901475.4	4.359729715	36.14865245	2.765174752	173.8559394	20.74347785	88.35958737	87.06795134	29.15723378	144.6987056	14.92092677	389.1999193	0.311968027	595605901.5	0.054974236	653.4080829	185.1394019	13.01375626	17566.13395	199.5732224	81.68175966	18.56219327	0.628004586	3.355081142	3.159899647	6.629538214	0.004995336	8.006541733	-0.150644698	0.823200096	0.261513636	0.98060715	0.352494569	0.904949171	0.255004393	0.011605622
B021	B	0	0.924377126	90.10267688	99.2975327	5694	83.28885352	304.2497834	0.053433401	5696	0.879191308	93.85718238	202.7608331	282047063.9	5.043245475	55.16329118	3.082971572	284.24326	33.65394923	143.0328205	137.7659063	40.16638147	244.0768786	23.13678037	445.046917	0.56613719	1128188256	0.035718935	1788.678337	479.8846493	20.75171667	170297.2321	2121.974006	234.7743531	37.79351766	0.722061904	4.748527001	3.657061206	14.37506436	0.002430096	9.104333063	-0.184422857	0.909983674	0.191810481	0.985102162	0.285704476	0.91610067	0.203308359	0.008031113
B023	B	0	0.691764563	84.60191064	106.6770828	3586	58.52460371	321.9066376	0.089767607	3588	0.659447373	39.7020217	114.7605239	126604689.2	4.536179823	35.835931	4.853999449	208.1246622	23.43128721	74.39960698	69.7374962	4.312339025	203.8123232	15.08447797	375.6891685	1.075139873	506418756.7	0.052923843	967.2856569	241.5227776	14.85315573	62994.36122	1325.404968	108.3133688	24.73804381	0.625261002	3.869907181	3.37784259	9.337303964	0.004596867	8.172157365	-0.162270041	0.865051408	0.225268149	0.986611237	0.318886962	0.919602504	0.239855878	0.012948313
B024	B	0	0.774540715	226.0863172	226.5921446	30702	175.1130577	678.5584412	0.022101441	30704	0.915379133	18.83880344	127.863783	1086295984	5.089913449	53.87951925	2.971854221	236.7275818	33.01234284	73.86739417	73.27072981	-42.82701347	279.5545953	22.73501695	376.1894432	0.192414169	4345183937	0.034238333	1741.668742	644.9394916	24.25347948	191071.0932	606.9135239	253.431659	26.59909412	0.810070841	3.978199728	3.443160629	10.22335277	0.002203372	9.267031935	-0.180239885	0.906284426	0.228456431	0.992049474	0.320708881	0.93731382	0.232392475	0.005244104
B026	B	0	0.486586526	162.0911234	151.4199458	9790	78.87135665	418.5929291	0.042757194	9792	0.837923537	16.64669209	128.6314256	345830287.3	5.110621137	61.23659533	2.881374842	233.4737369	35.13246552	73.35348229	72.74620256	-18.79527997	252.2690169	25.33025597	375.8597374	0.353448753	1383321149	0.032614326	1877.719451	417.2667881	18.88620411	191563.9533	1185.513945	267.3570915	25.08041461	0.82846774	3.797296955	3.384170695	10.19319466	0.002412752	9.064556204	-0.219460111	0.939343877	0.238268338	0.990737285	0.329332196	0.933757468	0.252259763	0.005848321
B027	B	0	0.836011661	67.40390226	69.97142274	2970	56.35044828	206.509668	0.069531875	2972	0.935497795	45.66047987	122.6357767	109053359.4	4.562317545	40.97308834	3.41516366	190.5251624	23.9201726	81.91120448	79.63365256	19.94879288	170.5763695	16.52516255	383.1114373	0.643044286	436213437.6	0.049403223	918.2052435	207.0989247	13.56104479	49199.16173	833.5915261	117.7080686	24.92811369	0.65008654	3.772799542	3.368562946	10.13399871	0.00439037	8.228530391	-0.182960651	0.890038635	0.243645947	0.982163677	0.333854463	0.910673981	0.251572547	0.012917146
B029	B	0	0.888888864	49.17735702	51.2249939	1650	43.713205	158.2253967	0.09589418	1652	0.910061435	23.85874742	88.94359509	51950494.06	4.305925701	35.12884078	5.281006023	200.6174813	20.9537579	53.64511838	48.41416176	4.983353622	195.6341276	14.26369739	354.666211	1.060547485	207801976.2	0.05905528	723.2514483	132.2679063	10.7815162	37780.56021	852.1272653	82.88760893	18.81151488	0.628672584	3.394140801	3.203412427	7.060732151	0.006268095	7.663777516	-0.188783818	0.890082838	0.250814325	0.989203087	0.342303539	0.926774017	0.268094907	0.01591968
B031	B	0	0.765181321	63.70196305	68.26419266	2264	48.74355223	215.6812409	0.095265566	2268	0.782043246	36.76209313	95.87986011	76159342.36	4.174428184	29.96629915	2.84157865	136.9091327	17.83454939	65.8109792	65.66367312	7.354366202	129.5547665	12.45488022	366.4966955	0.177466557	304637369.4	0.064502985	502.1552868	166.3747513	12.48281624	10726.01303	135.0268662	60.68791501	18.47960619	0.53395839	3.377275046	3.158441917	6.458425475	0.006277948	7.681942364	-0.152542035	0.829467338	0.260005116	0.976381558	0.350172547	0.895244143	0.258618396	0.017006856
B033	B	0	0.787032611	106.394177	105.9056184	6570	83.7356869	333.019336	0.050687875	6572	0.862815953	27.1047635	164.2216383	255760327.1	5.371291675	69.11694458	4.68489281	381.8848002	43.01416156	90.5986727	82.04281505	-15.9952389	397.8800391	28.88806675	394.546148	0.991781921	1023041309	0.028818103	3099.339784	617.5309126	22.68610538	905863.1301	9163.63169	458.0375292	46.55821557	0.815571643	5.007610312	3.756358916	20.47872256	0.001919084	9.461714017	-0.24104923	0.957511226	0.193692553	0.993192699	0.286166194	0.944254905	0.201841797	0.006234382
B036	B	0	0.756977699	84.86858134	86.53323061	4050	64.2436234	273.3380951	0.067490888	4052	0.825338834	83.55569169	154.679822	178329838.5	4.501645802	37.08115973	3.038354028	211.9840996	22.24000257	118.6433421	117.1683949	35.50450387	176.4795958	15.47187643	419.5727607	0.232536652	713319353.9	0.05137263	779.0536594	308.5883205	17.14586811	26534.76911	192.1159843	90.54148432	32.12437207	0.474685172	4.424002063	3.530634815	11.62119286	0.003770557	8.425165174	-0.123843173	0.796275998	0.202540967	0.977022048	0.296453631	0.896897326	0.214513794	0.009335469
B038	B	0	0.837883878	109.9856603	115.3949739	7794	92.15521156	351.0782105	0.045044677	7796	0.891417707	4.450235722	130.4602655	251722579.4	5.120333734	60.376107	4.070004396	274.6437355	39.04599814	55.902539	43.87785917	-28.95248298	303.5962185	26.55513581	359.3810449	1.116950462	1006890318	0.035315897	2488.118176	368.5338919	17.15722416	455734.4834	7041.418953	330.2932152	33.6765103	0.814001372	4.390907696	3.576499317	13.65660531	0.002674771	9.069390745	-0.209346777	0.931391924	0.212587106	0.99129235	0.304671724	0.935752972	0.223858312	0.008091791
B039	B	0	0.738549903	232.5579093	231.8965287	30826	171.7556214	683.0437226	0.022158039	30828	0.911202735	18.35510654	127.5210901	1087491611	5.091408104	54.71916595	2.966473587	236.7275818	33.09741146	73.30726169	72.84860083	-42.82701347	279.5545953	22.87248076	375.6386562	0.1997961	4349966443	0.034123003	1746.088376	639.6591494	24.14577126	189950.1236	627.5228053	253.2959133	26.73247334	0.809014427	3.988273481	3.447467894	10.28518107	0.002187962	9.271347683	-0.179310998	0.905512513	0.228004369	0.992010939	0.320274287	0.937170414	0.231904324	0.005173082
B041	B	0	0.691734014	142.6155415	166.9730517	10794	98.65202096	442.1909089	0.040966362	10796	0.832887471	76.58107722	177.0957868	492483580.5	5.002273461	52.12541093	3.691021811	311.5605116	31.37393493	125.2771243	122.4028142	19.61141929	291.9490923	21.5101743	427.1637943	0.545789105	1969934322	0.036916641	1608.274756	536.0761904	22.27820866	147196.0757	1480.264489	203.443529	44.43038782	0.639582226	5.05644314	3.767979696	17.71086553	0.002198327	9.270649861	-0.136901263	0.841747491	0.19158333	0.988224045	0.283432232	0.926072025	0.196918153	0.005918186
B042	B	0	0.542562826	191.3425157	192.3330445	15094	103.815336	517.5878785	0.034290968	15096	0.841439718	104.2380292	201.4992836	778191131.3	4.986896244	51.74416954	3.656942254	347.9026999	30.7114066	152.4060222	151.50497	38.21686815	309.6858318	21.2154696	454.0902642	0.364797253	3112764525	0.037272707	1526.759078	614.2901372	23.91817885	135519.6739	711.6238285	203.1658614	34.32480099	0.709579824	4.40288711	3.576932325	14.07616534	0.002381399	9.164150509	-0.15620102	0.870518432	0.213833722	0.991693086	0.306289556	0.937500064	0.217535349	0.006210861
B043	B	0	0.871305679	129.2259817	131.2097557	11210	112.5953317	421.019336	0.037557479	11212	0.891467873	-0.322637855	114.7358866	329681398.4	4.758712765	45.13558998	5.062999371	262.1030207	35.52112035	39.71419283	22.48728804	-28.32266628	290.425687	21.78320446	342.9538424	1.563493806	1318725593	0.052467993	2211.605176	264.3816925	13.96285737	468674.8863	8482.763443	297.515702	19.86254063	0.874140342	3.29437708	3.226158904	8.659199797	0.005587896	8.369701835	-0.215077918	0.924832795	0.276578103	0.99444583	0.364011142	0.949160988	0.279318404	0.016908009
B044	B	0	0.572104897	100.6809562	111.0855526	3698	57.60006801	357.4213562	0.096652611	3700	0.603125773	29.6559762	130.3671852	132526253.9	4.90123895	51.77049795	4.150559494	244.1511054	31.3918233	76.35845404	71.51155079	2.849602194	241.3015032	21.43908389	378.5123854	0.937942803	530105015.8	0.039041636	1625.939963	273.0915116	15.10796576	182252.9359	2910.622431	209.0919407	29.89862946	0.747342645	4.116436904	3.495751715	12.36838226	0.003304722	8.606544363	-0.219257133	0.932919227	0.229575929	0.988164649	0.32065648	0.926382444	0.231122504	0.00913373
B046	B	0	0.863414228	94.39732795	97.69339793	5794	81.50399602	317.9066376	0.05486825	5796	0.848778914	1.423776946	102.6818388	175505836.5	4.897111076	55.75241886	3.944272844	227.8885382	32.3421396	45.64872029	39.1164972	-33.49148506	261.3800233	22.83072112	348.0259191	0.93552833	702023345.9	0.03939558	1649.002521	311.4239748	16.18946726	176391.0817	2944.314058	219.6672546	22.39769935	0.813359231	3.58492143	3.306177408	9.118333495	0.003479287	8.615724901	-0.221081864	0.933254513	0.25099957	0.99229746	0.341722913	0.939235986	0.25541591	0.011762049
B048	B	0	0.668050601	205.4735611	209.6950166	21210	137.2667359	600.3330445	0.028304245	21212	0.859969438	2.501512122	86.67331717	629661220.7	4.736097367	46.42252338	4.336644897	253.7050585	27.0175733	42.90553993	39.32389484	-35.58927544	289.2943339	19.19145003	344.5820576	0.748709317	2518644883	0.043350305	1152.585089	321.7927177	16.97011608	108240.7823	1524.422843	159.248455	24.02269173	0.73751568	3.723077732	3.339361084	9.502899536	0.003229445	8.728255701	-0.153942624	0.85420326	0.240880278	0.993295449	0.332244099	0.942911498	0.253054888	0.007453418
B049	B	0	0.678240586	163.80394	166.0120478	13558	111.0984803	482.391919	0.035579873	13560	0.855662941	22.40301774	114.6397914	450493005.2	4.782861281	46.53314522	3.21635523	199.654568	28.37055932	62.77808586	57.78338576	-16.8832468	216.5378148	19.65896525	364.5391503	0.719740237	1801972021	0.042861792	1280.852531	327.3611806	16.99549739	99804.82136	1797.854544	178.7262725	24.67286902	0.756692342	3.795673321	3.360754984	9.516100362	0.003214227	8.776423174	-0.163178431	0.867646779	0.240080721	0.987837366	0.330822313	0.924423293	0.248721502	0.008550236
B050	B	0	0.548018389	57.90193208	56.92099788	1362	31.73132356	157.7401154	0.115815063	1364	0.829375748	28.21860858	141.4864192	49627597.47	4.974934108	60.05888347	2.878833007	226.3962725	35.13239743	79.06792506	75.88783749	-3.810970092	230.2072426	25.89375145	381.4911224	0.553099356	198510389.9	0.035887204	1842.984642	334.0459924	16.71142022	161594.5195	2058.550702	247.7395011	28.71900251	0.790599569	4.237671332	3.44453989	10.19109651	0.003801146	8.263668363	-0.323110079	0.978013364	0.200832243	0.987516658	0.297220898	0.920834427	0.21185399	0.010009631
B051	B	0	0.955866356	64.40905745	68.35202996	3050	61.56645107	214.9949494	0.070490147	3052	0.910597794	38.83653399	125.2808632	111157664.8	4.783430108	48.8762484	2.767219452	193.8556916	27.87273617	80.14172019	77.15376369	-2.35688593	196.2125775	19.99326205	381.6870614	0.368791812	444630659.3	0.041299004	1177.285432	320.4834005	17.0105014	63223.19434	760.5821983	149.0445939	24.57422602	0.715794843	3.874774611	3.372889855	8.942316566	0.003597707	8.481009298	-0.205151258	0.917309853	0.23072711	0.985337241	0.323131303	0.915955954	0.235673168	0.010357275
B052	B	0	0.777889312	64.71434777	65.96969001	2482	50.34059947	202.509668	0.081591325	2484	0.872087495	27.52561147	100.0628157	81857598.72	4.478734122	38.02833112	4.35718301	204.272624	23.43350727	61.82113032	58.20710321	0.548201604	203.7244224	15.99314056	363.0644281	0.928445564	327430394.9	0.052974139	901.248595	179.14234	12.47898388	56487.09102	1164.261076	113.8092333	20.15564097	0.698499673	3.445909034	3.252996461	7.877547298	0.005326219	7.960335357	-0.201257391	0.904253074	0.261665733	0.98848884	0.351316493	0.926095813	0.257749081	0.015811227
B053	B	0	0.818838029	84.58542888	89.55445271	4514	69.26176586	270.7939392	0.059989796	4516	0.879522126	29.03679943	98.60113906	149393915.2	4.472157546	38.23551094	2.843052747	149.3549664	22.17890825	62.73281884	61.63982555	-24.16383584	173.5188023	15.86181871	363.7638047	0.183292133	597575661	0.051620025	749.0077607	335.2674586	17.80180607	24457.25664	135.2803504	94.0745209	20.62690856	0.640212848	3.539951156	3.262002149	7.678423253	0.004229225	8.240160407	-0.145366344	0.837304284	0.245717028	0.984036117	0.337356129	0.912777428	0.257416184	0.009719621
B054	B	0	0.932304801	155.9333792	160.8228839	17566	145.3774381	534.0731599	0.030403801	17568	0.879712207	-49.64846854	37.62086241	366072322.6	4.584821424	41.31462857	9.343272124	315.8724295	27.80596393	-13.73361321	-23.91059487	-63.94399657	379.8164261	17.93642359	288.7036547	1.873626807	1464289290	0.052533212	1401.356018	156.6556765	10.5383341	364560.9968	5358.672551	199.6374725	17.24868289	0.840615931	2.850108611	3.050365327	8.764729233	0.006106272	8.110528326	-0.217534224	0.917580488	0.327673579	0.997189483	0.406514927	0.965548983	0.322077772	0.016116632
B055	B	0	0.508138179	119.3297441	116.6190379	5254	60.63599884	359.8477631	0.068490248	5256	0.714054169	-5.71472726	96.02524187	158198392.3	4.877690868	62.38075839	2.086892153	150.8308876	32.7699221	44.85322511	44.08145634	-30.59351377	181.4244014	25.43481579	346.9791271	0.151752554	632793569	0.036693008	1470.767791	307.5194337	16.08092741	87754.96585	400.9306418	211.3224796	15.64495626	0.861850542	3.040605274	3.084591132	6.074972348	0.003512194	8.479766177	-0.250595243	0.950165905	0.286351934	0.989553163	0.3734297	0.929224879	0.286960552	0.010997201
B058	B	0	0.659146475	97.6411484	102.3914059	4810	64.35981879	281.137085	0.058448458	4812	0.874499031	24.41066262	99.44172495	157034298.3	4.583560929	38.17000167	6.662813654	245.49444	24.0426204	59.86302061	56.32532996	-10.40994997	255.90439	15.9448787	361.2970749	1.252353979	628137193.3	0.050453666	1034.182737	256.5658104	15.16611168	122702.6388	1991.71743	132.8844919	26.68923558	0.665134375	3.744712286	3.358197356	11.97391815	0.004354376	8.287725854	-0.175085842	0.878195225	0.249016698	0.991048349	0.338894424	0.937264493	0.25859269	0.010942514
B059	B	0	0.767306426	81.29532407	86.092973	3846	62.37842452	250.7939392	0.065209033	3848	0.876581973	45.43637643	151.3145207	151480070.7	5.064471806	55.80232937	3.981596245	272.608113	34.02242371	94.41004252	87.6089181	-0.323840652	272.9319537	23.11131549	396.816949	0.792290503	605920282.9	0.035732038	1904.409343	475.3420771	20.41236791	289805.3568	3682.895736	270.9293354	36.23227764	0.764322194	4.665173672	3.631669547	13.63968147	0.002655259	8.95439004	-0.233263924	0.947498336	0.195536719	0.988883999	0.288758736	0.926505664	0.210819848	0.008449143
B060	B	0	0.690167848	134.3183141	134.2385936	9626	92.70218179	390.391919	0.040555986	9628	0.890896066	26.33746575	133.2643681	342366083.2	5.024022901	53.9934596	4.657229564	312.9900508	33.77203833	74.68550776	66.64315957	-24.16534	337.1553908	23.26289844	377.1441035	0.952043994	1369464333	0.036753866	1848.445061	454.8024745	20.02834174	282465.3074	3719.281097	246.3131682	31.67026466	0.771809996	4.153756282	3.505331744	13.76047934	0.002731104	9.011349071	-0.189708229	0.911302777	0.224232401	0.99342299	0.316415243	0.944799795	0.233192217	0.010212287
B061	B	0	0.815054828	55.55968832	63.56099433	1882	45.2841922	178.0243866	0.094593192	1884	0.863843846	36.59576073	118.3414568	66314759.06	4.541792135	38.06909696	3.434949697	204.9242846	24.3199603	73.94878536	68.59172131	12.99839707	191.9258875	16.46307464	375.2274867	0.677250051	265259036.2	0.051437741	957.9727206	190.4329233	12.90308557	50112.34331	962.0784626	119.1104155	23.36509633	0.671095347	3.767214902	3.337415092	8.792938409	0.005150345	7.994155664	-0.217296004	0.923319802	0.234652449	0.985379633	0.327432819	0.916193925	0.238638535	0.015672
F001	F	0	0.826575504	84.26366262	90.24411338	4562	69.65027942	268.4507935	0.058844979	4564	0.891903525	20.14271821	128.8080579	156699651.8	4.958809688	59.63149545	5.627647581	314.3054109	35.08480519	67.88638816	59.08241042	-13.31421006	327.619621	24.62113154	370.5878645	1.21441164	626798607.3	0.038293054	1994.970715	331.7366865	16.51183074	327038.1304	4793.872592	261.1566499	24.81328851	0.825204646	3.751828288	3.348252708	10.1628096	0.003524416	8.637390698	-0.236014882	0.944406762	0.242132421	0.994469198	0.334024615	0.948146037	0.241261782	0.013043991
F002	F	0	0.66803315	189.043736	195.7242959	18442	126.2874825	550.27417	0.029838096	18444	0.87484238	13.43540358	84.06193696	551513118.1	4.411482802	34.64916418	4.726051669	194.7894175	22.31381872	44.62114093	38.81747454	-14.69496132	209.4843789	14.79440885	345.844093	1.161784447	2206052473	0.057310597	844.4058868	179.6200793	12.3251694	70199.92759	1587.755088	121.85021	11.01124166	0.83415983	2.456445971	2.819016806	4.691998063	0.006671155	7.843843286	-0.215219955	0.907299759	0.341695841	0.993951447	0.420726214	0.946945238	0.339946806	0.016109333
F003	F	0	0.722346354	93.07115751	96.74709298	4642	67.22961126	298.5929291	0.064324198	4644	0.808868608	40.14844109	106.8210165	161998294.6	4.431529553	32.81849294	5.100073749	221.4921122	21.03460894	72.52574273	70.71639359	-0.089002858	221.581115	14.14476807	373.5417177	0.7709858	647993178.5	0.05556928	757.9858266	269.3377504	15.84302995	45050.33414	711.1148187	97.55451364	24.21335703	0.602499492	3.610022984	3.317342902	10.63395789	0.004778641	8.177405654	-0.152879019	0.844163586	0.25536383	0.989225619	0.34482136	0.930999362	0.264568128	0.013446465
F004	F	0	0.707358424	80.17211456	80.04998438	3526	56.71042061	232.1665222	0.065844164	3528	0.906664247	3.405168076	118.2583883	117063259.7	5.078907842	62.805114	2.485252698	191.1746475	35.32048648	61.75499073	61.58545723	-29.96462314	221.1392706	25.73957697	364.3141286	0.145569922	468253038.9	0.033118917	1858.110961	404.876226	18.56596128	166187.7871	406.3497457	263.4155385	22.7056253	0.841148515	3.744608727	3.33592019	8.318675955	0.002846055	8.773590908	-0.262637191	0.96195477	0.231737836	0.9891688	0.32517401	0.926377625	0.239795883	0.008935999
F006	F	0	0.582066122	230.893313	231.6031088	23886	134.3951753	637.3868684	0.026684538	23888	0.859554729	50.7210355	189.6067023	1046713605	5.333152431	77.18306902	2.358420159	271.9248998	42.73943161	115.4923036	110.5534719	0.3519812	271.5729186	31.86776244	418.6528336	0.338152625	4186854420	0.027278505	2636.340735	655.8019613	23.66740025	372220.4127	2624.628002	404.4262558	21.80291883	0.897759257	3.614330776	3.299214968	8.235708779	0.001948746	9.37897109	-0.24327717	0.956604364	0.24396035	0.992971079	0.335548417	0.940598895	0.253136174	0.005694103
F007	F	0	0.64052166	83.49793974	84.11896338	2834	53.482239	292.7350647	0.103293954	2836	0.644659086	64.4586199	143.7136427	115361818.2	4.59713978	40.6459102	2.9604814	199.0143957	24.63566815	102.2094761	100.0379557	20.05795202	178.9564437	17.39526737	403.3740249	0.415173717	461447272.8	0.047730071	938.1412566	299.5139787	16.67470052	38600.93695	521.3462705	116.0554517	30.1884745	0.586847991	4.166579118	3.499238788	12.27166281	0.003988841	8.33489851	-0.176180774	0.887675739	0.224738552	0.978668986	0.31625238	0.902679658	0.227930443	0.01332816
F008	F	0	0.767205716	244.0211774	250.8625121	35510	187.2144421	724.2985566	0.020397031	35512	0.922279697	24.83859838	164.4951076	1386419285	5.455390984	75.95339397	4.60226426	476.1509393	44.49649535	91.15105428	84.31091683	-35.77767441	511.9286137	31.2575349	395.1752393	0.824381761	5545677139	0.026477766	3164.322518	817.5353831	26.68318353	888754.4081	7302.510312	463.5352374	41.36710172	0.835978687	4.56173682	3.655016159	19.77053654	0.00162956	9.758330115	-0.210226293	0.941548796	0.215897998	0.99629558	0.30722283	0.959491948	0.222904212	0.004301085
F009	F	0	0.735535416	238.573937	244.0081966	32438	175.47958	740.0975465	0.022815758	32440	0.862666637	26.99620508	129.9375598	1170422323	5.003282101	60.29463251	3.259208007	267.5061764	33.00978712	77.73172829	75.23268363	-23.93104316	291.4372195	24.29030268	379.8926326	0.441059007	4681689294	0.03488841	1637.15371	493.6212565	20.90845024	166089.7428	1287.44014	239.5210531	13.69161956	0.891469342	2.788737547	2.977991742	5.557108072	0.003230735	8.691947922	-0.255655838	0.952898266	0.308491334	0.996133923	0.392855914	0.956267778	0.307083756	0.007582976
F011	F	0	0.614370134	56.54326912	60.03332408	1278	34.73849583	192.1665222	0.150365041	1280	0.659466332	-18.87861296	50.36402642	31867073.56	4.501253796	38.98756909	4.256881095	134.7084846	23.71509707	14.09726771	11.03491612	-47.59504549	182.3035301	15.95578461	315.5702851	0.798514378	127468294.2	0.052519531	927.5112833	181.7039629	12.68594868	43917.29312	741.7731607	106.014224	22.96221759	0.640103903	3.662855524	3.312063793	9.071418848	0.005885782	7.742204507	-0.247900947	0.939080939	0.24493547	0.984222271	0.336887499	0.914746214	0.244670491	0.017949247
F014	F	0	0.336207835	102.1817737	102.4890238	2742	34.35431296	240.8528137	0.087838371	2744	0.770702793	14.91104319	119.8765832	92808794.88	4.917099138	53.11205069	8.577875685	362.4153885	32.35593459	65.21667032	60.02119629	-15.00404193	377.4194304	21.52353102	367.8176022	1.509835556	371235179.5	0.0393841	1906.572174	345.0852659	17.17180047	506780.9852	5704.017188	252.665703	51.84157889	0.659941027	4.908657991	3.689226211	26.15533962	0.003409205	8.584377128	-0.247658134	0.94891859	0.214629678	0.99180053	0.304222024	0.943458355	0.227145716	0.009908753
F016	F	0	0.761977204	77.89261436	77.79460136	3462	59.35239652	246.9949494	0.071344584	3464	0.844462544	34.33953354	131.9732754	128600170	4.943044374	47.83226554	9.510954876	369.8841563	32.99069464	82.43422314	74.47552725	5.908992621	363.9751637	20.1439677	385.3557338	1.955422687	514400679.9	0.040205025	2243.106504	316.6530204	15.64003531	864050.5993	10582.96873	316.4987244	28.35380902	0.835715361	3.673122806	3.314659992	14.25786691	0.003929441	8.415534599	-0.287704433	0.966889759	0.259537233	0.994949549	0.34837179	0.954198187	0.265318136	0.011730657
F017	F	0	0.545918246	96.56822741	104.7854952	3386	52.71835731	286.5929291	0.084640558	3388	0.719752095	97.55844517	162.4730757	157358421.1	4.401773842	32.41039791	4.12825569	242.8545291	21.13318984	130.1457155	127.1576919	46.40473942	196.4497897	13.87419515	431.0258227	0.701631128	629433684.4	0.057360585	757.9232733	316.3357972	17.26768866	36524.41311	648.350534	94.10169573	21.4738733	0.625575072	3.462535394	3.260211584	8.873856484	0.005472276	7.977405781	-0.172753339	0.867581413	0.266786971	0.987272699	0.354544286	0.924569977	0.27098268	0.018521837
F019	F	0	0.384977475	118.2980737	111.8928058	3770	45.54209367	294.7939392	0.078194679	3772	0.738341121	43.04698014	113.3920207	133894295.9	4.45530353	37.98677851	2.872051292	171.6927239	22.20168635	75.81744765	73.40533452	2.59596777	169.0967562	15.8030768	376.8124049	0.342292075	535577183.7	0.052587071	748.8345145	262.7640305	15.58793883	28350.16404	302.6642794	100.3995544	21.28007013	0.650156118	3.526402865	3.263392797	8.410487226	0.00449871	8.193734553	-0.162975079	0.860388627	0.24916261	0.983717313	0.340831226	0.913416642	0.257837015	0.013500351
F020	F	0	0.915771637	75.06263338	80	3998	68.74023065	243.6812409	0.060950786	4000	0.919822925	4.762717451	96.39092231	125323747.9	4.824298878	50.20314712	4.119035555	231.5050957	29.37993563	52.10171366	49.04097172	-30.90789032	262.412986	21.09142786	354.0109431	0.587850274	501294991.5	0.040336	1348.131104	350.5903006	17.67624364	137663.6054	1319.610749	184.1700674	31.62390099	0.706616357	4.173321773	3.48883852	13.36882227	0.003174781	8.657364375	-0.202442926	0.916698988	0.225653849	0.989749325	0.316768136	0.931766843	0.236379338	0.009139451
F021	F	0	0.538759722	88.97028459	92.19544457	3270	47.93360576	242.3086579	0.074100507	3272	0.83658462	41.80956897	140.1486613	124571221.9	5.004629351	46.76947006	7.018335347	351.460373	32.9361804	87.58950243	81.34178852	-34.80321941	386.2635924	20.54643527	390.240384	1.385283611	498284887.5	0.039493427	2061.934906	674.1701408	24.73067559	552077.5062	7053.16008	293.1765155	42.94268933	0.745163838	4.667004199	3.630586833	19.8323337	0.003312836	8.689430878	-0.259390916	0.956737664	0.212451953	0.993271961	0.304097832	0.946152012	0.218531948	0.010304356
F022	F	0	0.916276495	51.65184676	54.40588203	1902	47.32737309	168.8528137	0.088776453	1904	0.915591783	63.09782159	143.0655494	78522109.83	4.627735136	41.1755058	3.918937229	244.2595477	24.97023197	104.8926611	103.140804	31.35670031	212.9028474	17.14702066	406.1556544	0.493115947	314088439.3	0.047295389	1024.34857	255.1018862	15.10333718	68453.69194	702.1988518	133.8048611	25.86078006	0.67714228	3.833402008	3.377290171	10.63081992	0.00465438	8.111589766	-0.237448856	0.939066151	0.237743203	0.986804963	0.329955131	0.922398205	0.239491402	0.015680894
F025	F	0	0.747314303	182.4635061	186.7832969	15470	136.3575879	640.9848481	0.041434056	15472	0.687863595	-12.46143006	101.8115754	440905420.7	4.977364062	51.43532838	5.60577901	262.2550058	36.10646371	34.16290425	20.60999471	-39.49899974	301.7540055	22.67857028	337.6210269	1.518974908	1763621683	0.041031388	2323.111211	306.2812583	15.05859152	626865.3476	9368.944643	334.5332154	16.4712155	0.905550214	2.947536262	3.053842147	7.267951581	0.004313786	8.565013565	-0.267925927	0.955763943	0.306500711	0.995684741	0.389342758	0.955587984	0.309007373	0.013217077
F026	F	0	0.870211972	99.08073363	102.6255329	6242	86.22124063	355.5634919	0.056963071	6244	0.787679697	8.174472421	75.80081201	181952036.1	4.447769862	35.92701515	3.536567484	149.2104268	21.56266086	40.3055125	38.19917599	-30.41012119	179.6205479	14.85192322	341.4106059	0.593678504	727808144.2	0.054266779	753.3599938	254.3916023	15.32903662	32447.30929	535.6246645	95.21982556	17.57541171	0.687728365	3.253635007	3.124479808	6.391170198	0.004930021	8.109213837	-0.160041172	0.84274182	0.266879733	0.987664932	0.356124769	0.922915228	0.276348341	0.012020411
F027	F	0	0.801577284	207.0407753	218.1559076	23190	165.9591824	688.901587	0.029706839	23192	0.783606665	-19.30381604	37.65340725	553036991.8	4.23441579	28.55262677	6.33985617	194.0551324	18.55206286	7.8471789	4.27403921	-51.37545152	245.4305839	12.00859386	308.8431585	1.185250683	2212147967	0.065912512	614.2109926	188.1338881	13.02861012	46022.13291	968.6132968	85.43217481	11.8762025	0.755377932	2.537950343	2.83101982	4.948850519	0.007617993	7.70038754	-0.177809195	0.842838871	0.339293443	0.995364527	0.417738711	0.953441427	0.337129275	0.019853776
F028	F	0	0.743631773	102.0762491	102.4890238	5882	75.90714217	321.6223664	0.054679083	5884	0.845320107	0.620759073	85.66950897	170533913.6	4.634676029	48.76068521	2.653047222	173.2284321	27.05078433	38.9236064	33.6988132	-34.01896055	207.2473927	20.11389362	340.4858304	0.535578931	682135654.6	0.045330965	1061.389732	258.4260303	14.9677882	58402.79872	1049.896985	149.6275873	12.07566149	0.850287422	2.695656365	2.906041016	4.545668969	0.004691017	8.121588339	-0.234656692	0.933030194	0.30637119	0.99330471	0.391194697	0.941848408	0.317892069	0.011946753
F030	F	0	0.758267372	82.32002913	84.89994111	3522	62.42059216	279.4802307	0.079352706	3524	0.752746101	65.223196	152.3238655	148459659.2	4.750310255	47.59707481	2.99111777	230.4631779	27.49194944	109.0922353	108.4627294	20.04649668	210.4166812	19.68086224	410.5029434	0.268054412	593838636.9	0.042453821	1156.209557	354.3434635	17.89748358	68517.24155	419.5020804	156.3045959	20.23265433	0.77072219	3.438499402	3.24340308	7.999205578	0.003807319	8.393895346	-0.220690961	0.929514628	0.260568859	0.989470669	0.350314112	0.929335624	0.262858089	0.012329632
F033	F	0	0.611454852	116.1441473	130.3840481	6122	71.01690238	355.3624817	0.058046795	6124	0.780512783	65.2243794	152.41313	258216831.5	4.804000236	46.68827173	3.800243471	280.745527	27.80533563	109.1418931	110.0027277	8.541216024	272.204311	19.17566778	410.681064	0.389673729	1032867326	0.042706769	1261.847592	475.9943859	20.98352962	99582.51101	583.978193	166.559294	23.85504197	0.747558443	3.600411662	3.304791081	10.27077442	0.003682217	8.534893702	-0.20836351	0.917453782	0.256137122	0.992697846	0.345997702	0.942215025	0.25802745	0.010381293
F036	F	0	0.6780646	96.56115338	100.3194896	4926	65.47469986	274.3086579	0.055685883	4928	0.907011139	49.03402837	172.3535847	203289032	5.164645616	69.55327343	3.840935383	331.4031744	40.63097822	103.0719308	93.1052166	23.77892205	307.6242524	29.03122197	406.2109442	0.96239946	813156128.1	0.033055216	2540.349783	382.6279082	17.04735089	548527.1414	7310.71761	388.9642095	20.90215025	0.897875976	3.348842807	3.210253232	9.163877125	0.003295626	8.742625155	-0.305497288	0.975887169	0.270191179	0.994893932	0.358608712	0.951444274	0.277775566	0.010256445
F037	F	0	0.511650554	78.73797951	80.89499366	2314	40.28633088	211.4802307	0.09139163	2316	0.806337455	26.3473216	121.5643798	77090653.49	4.648681844	44.07415835	4.398083999	241.4360851	29.27818164	62.93922213	52.53205024	-1.913020196	243.3491053	19.40925822	364.8896809	1.213188837	308362614	0.050838054	1419.600305	235.7075218	13.85865555	154579.5036	3357.949083	195.0194804	20.45598151	0.810027557	3.415977808	3.228589831	8.447508534	0.005530496	8.018884098	-0.261112594	0.95172963	0.259612821	0.992118009	0.350255362	0.938706391	0.261281317	0.018263097
F038	F	0	0.634120575	59.19497804	64.62197769	1482	37.53675353	193.0538239	0.130265738	1484	0.706888027	34.7723241	104.6220163	51270069.23	4.510927018	35.18127001	6.237190654	206.967048	23.33623023	70.34167911	66.25082703	-4.637088058	211.6041361	14.48528301	371.7448812	1.214036457	205080276.9	0.055092596	1041.297392	262.2319139	15.33961148	139030.9407	2486.833505	139.6000878	31.89303061	0.629159042	4.308083797	3.512350826	12.55362067	0.005459484	7.87437359	-0.249540163	0.94357448	0.21518282	0.983776967	0.307180341	0.913914195	0.228472407	0.016283552
F039	F	0	0.847557664	85.63075053	87.86353055	4834	72.57699886	267.9655121	0.055433494	4836	0.919770238	42.78422603	163.7958538	191910807.8	5.160970349	53.31947563	8.5544221	414.3922664	38.94676313	94.64937707	83.29839192	-13.29857639	427.6908428	23.57599348	398.4158122	1.782943262	767643231.1	0.036287672	2987.028627	605.4822874	22.48042807	1609609.714	16621.44708	444.6726197	44.22749793	0.81937909	4.830801214	3.703735434	19.68616343	0.002753457	9.026815037	-0.254968174	0.959357716	0.207372036	0.994220218	0.298080132	0.949007439	0.214196947	0.008824442
F040	F	0	0.655386653	65.55692057	65.51335742	2114	42.96513074	199.4802307	0.094361509	2116	0.817066795	65.26194551	144.2025513	88280720.09	4.610530401	42.06614232	3.209669796	244.2595477	24.93486139	107.3378341	107.6252186	31.35670031	212.9028474	17.76371754	408.5122625	0.13480138	353122880.3	0.046587169	958.1575238	275.2780821	15.75185973	45789.43633	22.99345857	132.3274568	23.70547575	0.69647069	3.645686974	3.315993314	9.882014717	0.004321085	8.186460193	-0.227965082	0.932737917	0.250077345	0.987877793	0.340937562	0.925849463	0.252193823	0.013160342
F042	F	0	0.714479071	126.9176151	128.5612694	8914	90.67997969	370.8772004	0.041606148	8916	0.902424985	27.27713921	120.6826669	312305865.4	4.880938997	49.26185722	3.304009569	224.7582275	29.39045306	72.49536994	69.63092137	-22.63785911	247.3960866	20.73205446	374.3131083	0.49465651	1249223462	0.039339302	1357.502392	439.4679713	19.85815208	117853.1017	1210.07354	194.7237084	14.25339047	0.862586787	2.885205885	3.009647481	5.590809409	0.00367701	8.512436589	-0.248044107	0.947186074	0.295594633	0.994419068	0.381771874	0.947343602	0.301498503	0.00866781
F043	F	0	0.864045102	150.7690566	168.9615341	14302	130.2712648	505.5878785	0.035350852	14304	0.838506948	5.291725891	79.55015687	420562021.8	4.539752195	38.60231342	3.173302167	167.2456859	22.74824545	41.74287192	41.1143456	-27.54930394	194.7949898	15.87280233	342.9385212	0.318846541	1682248087	0.049931435	818.638845	244.7783555	14.83047773	41443.4305	373.1838527	114.6917164	15.35210771	0.763511786	3.004591891	3.036489271	5.791061161	0.004504302	8.256516658	-0.178770244	0.869780391	0.288467712	0.990721363	0.375123794	0.933127313	0.292695616	0.01018031
F044	F	0	0.610453746	99.65178531	100.4987562	4470	60.83280561	277.137085	0.061999348	4472	0.855192826	-16.98166805	102.3822487	123841001.2	5.012807924	57.0119752	3.665212611	199.7217535	36.98326536	29.53452103	15.89185253	-57.18399807	256.9057516	25.23930556	332.8214631	1.047264379	495364004.8	0.03864715	2177.125758	394.1928755	18.00101428	359087.5446	6079.117643	307.4385298	26.85450991	0.838979322	3.908574603	3.41370737	10.91978712	0.00344205	8.720944972	-0.24606429	0.951404625	0.237285062	0.990480893	0.327825682	0.933263777	0.244978149	0.011099188
F045	F	0	0.717546641	97.14790434	102.9563014	5110	69.70815239	292.3675324	0.057214781	5112	0.866734811	6.997484173	82.00199139	147995381.4	4.445344589	33.02269468	6.860569992	198.4938263	24.11854361	38.68079127	29.93106176	-25.07829373	223.57212	14.66068349	340.2974183	1.690583685	591981525.6	0.060701017	1097.654496	221.4126567	13.83713514	136631.278	2805.879101	136.5895768	16.8433643	0.778024321	2.987248965	3.092952049	7.619130413	0.00699696	7.870563235	-0.198930199	0.898861171	0.300943518	0.992346885	0.384880935	0.9418516	0.307187265	0.024721567
F048	F	0	0.566562926	99.05688725	99.15644205	4202	56.12195987	279.4802307	0.06651124	4204	0.822208312	24.92020594	118.3080329	142194308.3	4.77621551	45.10600539	3.432672573	189.6331681	28.23576747	66.0514061	60.68866113	-10.54219316	200.1753612	19.22067499	367.8237336	0.79585108	568777233.1	0.043111495	1300.667113	306.2899028	16.36942703	106101.5238	1926.932053	174.2636223	20.95412592	0.784453213	3.519969687	3.238137473	7.896832649	0.003961843	8.416657035	-0.221416381	0.926967112	0.250003254	0.988084238	0.341338652	0.924634772	0.257769756	0.011239527
F049	F	0	0.769666632	62.39528029	67.08203932	2230	48.02356524	207.6812409	0.093130601	2232	0.806046494	68.75640362	151.8937095	93651233.96	4.682150433	44.30680819	6.286522782	287.4228179	27.1335848	108.0390996	103.522126	36.08398646	251.3388314	17.80602104	409.6751794	1.361992517	374604935.8	0.046601405	1337.845819	250.4612109	14.76142186	167806.4006	2777.993604	167.9495074	37.71978272	0.630991134	4.379180125	3.544979071	17.49837457	0.004329764	8.256639974	-0.225919525	0.931622052	0.222942035	0.986652866	0.313431283	0.925761287	0.239831797	0.012707668
F050	F	0	0.797402815	106.761669	116.1034022	6758	85.13205538	348.7350647	0.051603295	6760	0.835638438	-7.023482604	91.79789378	194719447.1	4.904055824	53.27403533	4.674658273	255.1523892	31.69522005	37.02448182	29.60317763	-48.33314345	303.4855327	21.8831321	339.4386657	1.010634568	778877788.5	0.039927173	1633.106418	360.9791871	17.66591964	226883.8403	3374.337134	225.096673	29.5273687	0.767570537	4.049744781	3.477712824	12.50032693	0.003188761	8.789383628	-0.200109385	0.917886227	0.231527322	0.99258072	0.32245093	0.941294009	0.241911669	0.009209313
F051	F	0	0.604907257	141.1076889	146.6969666	9338	85.35706496	399.8477631	0.042819422	9340	0.856716628	62.95499269	195.9546309	419153782.3	5.276706393	72.15006193	3.571496748	351.8983767	42.69825601	120.3377472	107.977626	13.56065727	338.3377195	30.04958453	423.6851596	0.917197976	1676615129	0.030866114	2825.292725	602.8872073	22.56989937	576555.2558	7563.099731	415.9058911	41.95853333	0.816897662	4.860007413	3.708797865	17.10590705	0.002107161	9.418186021	-0.216951975	0.940147886	0.200775281	0.991501281	0.291780777	0.937110914	0.211770443	0.006902821
F052	F	0	0.68356898	108.3282229	117.6605286	6206	74.04981284	318.1076477	0.051258081	6208	0.877883138	52.69540284	145.9187258	243835537.2	4.81468754	48.27104325	4.24059827	258.3034952	29.30206902	94.59579049	87.94393968	15.73929279	242.5642024	20.02713065	396.3717025	0.954447456	975342148.7	0.042352236	1404.688656	305.1448439	16.26493231	160915.6096	2648.903119	189.4034781	27.02084143	0.750669185	4.002583082	3.448217163	10.39806641	0.003221339	8.722450253	-0.181550096	0.898686395	0.23105791	0.989161062	0.322340209	0.927887645	0.233952289	0.010034518
F053	F	0	0.705782697	172.1466489	194.010309	16112	121.4981261	521.019336	0.032337347	16116	0.863626217	-8.202620692	83.25111394	467718829.8	4.89724634	47.86680775	6.875445118	265.1246964	30.31933149	38.2474814	33.6725875	-47.67304476	312.7977412	20.04869091	340.7169924	1.370993795	1870875319	0.040331511	1676.710266	392.3408907	18.16035139	452407.148	5627.75014	260.787197	10.61882752	0.92178554	2.171609939	2.671550368	5.536233439	0.005500793	8.12403866	-0.342928843	0.977833067	0.401741956	0.99746833	0.468088357	0.968371838	0.384700977	0.014421255
F054	F	0	0.830136526	55.08800027	59.36328832	1934	45.73056115	175.882251	0.090942219	1936	0.886362047	9.891986681	123.8935563	63395326.59	5.002355045	62.16085234	3.030485432	204.8819364	36.47777743	59.15660524	48.60500479	-24.37696048	229.2588969	26.23759714	361.9144647	0.728262992	253581306.4	0.036566833	1988.612646	330.2144998	16.57169953	213194.6304	3386.062166	256.5220895	34.24823636	0.763277087	4.572814991	3.597060209	12.68546728	0.003352933	8.533950273	-0.272051264	0.963771367	0.198220425	0.984614168	0.292056656	0.914023905	0.205558482	0.010235288
F056	F	0	0.472736689	167.5224937	191.039263	9098	79.19402903	513.5046174	0.056441484	9100	0.658466288	34.15098426	184.7574822	359535360.2	5.341017528	74.07336617	3.641484487	311.0522926	47.46750476	92.97021643	75.21074211	-6.133635123	317.1859277	31.776061	397.5393326	1.107673764	1438141441	0.03119488	3611.929961	567.630036	20.89358025	1129621.606	15273.09911	555.5808953	31.2532234	0.893659452	4.128600495	3.495572989	13.36079613	0.002501927	9.262748461	-0.261000877	0.96409761	0.229473811	0.99285753	0.321072442	0.942847626	0.233794899	0.008352689
F061	F	0	0.922507728	134.3034412	147.1054044	11754	123.8959624	491.7300141	0.041835121	11756	0.781575717	-4.967593125	96.50719425	359316826.7	5.038761927	60.79625786	2.990121646	194.3552676	33.44438316	47.23139731	46.46153619	-53.90049005	248.2557576	24.15112978	349.6543896	0.17832128	1437267307	0.034907472	1688.548874	489.2754798	20.83744506	173592.0605	436.3550508	243.4814508	23.18176334	0.826275997	3.657413669	3.31462266	9.136928833	0.002664933	8.961681832	-0.21777383	0.932012625	0.248839697	0.991064764	0.338746896	0.934790977	0.25778473	0.006927804
F062	F	0	0.412851565	247.2293063	230.2346629	18154	102.069006	672.2985566	0.037033081	18156	0.710442475	53.99234938	192.0308332	859057301.4	5.487875108	64.34796881	11.51843375	594.2806522	43.75728718	130.5372084	132.5572001	-42.32891259	636.6095648	27.45050911	435.0417881	1.186133268	3436229206	0.02818757	3899.069647	1396.229927	35.69348056	2880707.1	10730.92799	551.1092761	62.29197328	0.796634629	4.907173495	3.664273812	36.99673429	0.001734723	9.677508663	-0.233608486	0.953130643	0.209899871	0.996532599	0.301364693	0.964763303	0.21556024	0.004977321
F063	F	0	0.736368471	63.51692076	71.02112362	2122	46.77185784	226.0243866	0.106514791	2124	0.722474166	115.6137465	186.086432	107812571.8	4.467064919	36.95239393	3.259129578	257.9486362	22.13658394	149.7337482	147.3188283	76.8469775	181.1016587	15.38225146	450.5961144	0.351727041	431250287.1	0.053429375	776.4140284	252.5835669	15.39544001	26402.10219	168.1002572	91.52039838	29.27364902	0.515557683	4.180845204	3.464020531	10.93024022	0.004715505	8.094227559	-0.178382892	0.882019113	0.222342064	0.980003841	0.314234501	0.904278407	0.222884591	0.014777027
F064	F	0	0.96262264	123.5762191	137.9275172	11254	118.9572663	460.1320344	0.040886088	11256	0.817289496	99.64077732	191.1765758	563647642.6	4.896639051	50.10288176	6.10492907	357.11883	29.98708272	145.7805872	142.3370735	58.44982854	298.6690015	20.34127411	447.5502468	1.140145584	2254590570	0.039806046	1580.891464	395.053057	18.62618569	278007.6488	3438.39518	219.9461198	27.47351405	0.777385629	3.634008394	3.293101132	13.14720019	0.003358401	8.710638338	-0.215691255	0.918685698	0.269108731	0.993026285	0.355906102	0.946603473	0.269780709	0.008513461
F065	F	0	0.986038525	72.0698431	77.66595136	3966	71.06364181	252.9360749	0.063776116	3968	0.882613391	95.32454371	180.7312893	188126232	4.738561111	41.20750656	4.561745951	300.9452546	26.9657829	134.0564886	128.7372418	49.45765816	251.4875964	17.96663174	435.4806299	0.946686717	752504928	0.045775478	1238.343747	376.0092109	18.39850338	133350.6944	2270.336795	176.1174464	26.10270926	0.742159954	3.855920084	3.359732942	10.36345031	0.003878138	8.46530091	-0.216967091	0.924019319	0.236965953	0.990743887	0.328509085	0.93405178	0.243760426	0.011090034
F069	F	0	0.715903565	94.40558264	98.79271228	4922	67.58529319	281.3380951	0.057159304	4924	0.883989678	70.52359259	289.8029111	282799542.1	5.985427187	120.5133243	2.993022778	456.7203878	69.79898509	171.5869253	158.5478802	6.635549825	450.0848379	49.83847853	479.3031956	0.652459739	1131198168	0.018348763	7337.325225	1366.367613	34.24834035	2668258.812	14764.20439	970.4866689	196.9604479	0.661711066	8.836260379	4.365294135	105.4218048	0.001312159	9.99105613	-0.330103275	0.987324322	0.178124382	0.97931701	0.257782517	0.920551334	0.18170309	0.005292662
F071	F	0	0.743829897	167.7863991	192.3330445	14410	124.80454	594.0731599	0.041226451	14412	0.716303364	44.71195484	186.6103759	635338446.1	5.454748368	61.19095575	11.61753159	506.8090209	45.43591883	114.356559	105.3025589	-7.359355993	514.1683769	26.39181601	419.9237491	2.2111154	2541353785	0.029264092	4644.597131	796.8528887	25.46330214	4542088.54	34339.83313	673.3387974	79.4484868	0.78904112	5.004177529	3.688903426	53.3084516	0.002128459	9.4937542	-0.259471006	0.964735707	0.232965993	0.993677285	0.320788526	0.957446472	0.238518738	0.006430188
F072	F	0	0.6387252	114.6671732	126.3170614	6462	73.24081318	342.1076477	0.05294145	6464	0.832962838	57.77534601	160.9349876	285670900.9	5.023242852	45.97119103	25.35867308	537.9740337	35.75210679	115.7858418	110.1547051	6.153395712	531.820638	20.10234002	420.4480319	3.816636388	1142683603	0.0382752	3898.681317	631.4602166	22.72852049	6951551.013	44653.49716	536.3820985	76.90000084	0.749642793	4.5365541	3.467418641	55.43680379	0.002997681	8.872757339	-0.23150712	0.941478668	0.240543901	0.994681181	0.329354957	0.962363644	0.249832167	0.008907049
F073	F	0	0.750913614	119.4160525	134.2385936	7850	89.67113958	401.9066376	0.051198298	7852	0.781474087	39.11241596	171.0229226	339623571.1	5.237387029	68.47857625	3.959034397	487.9526558	40.45219438	112.9599324	119.1431831	-3.003621362	490.9562772	29.38426268	415.9477336	-0.081590584	1358494284	0.030000501	2476.611362	666.1028286	24.11422454	361658.2171	-2081.339447	359.0941093	20.67103682	0.890805629	3.371404766	3.210406385	8.765273363	0.002541764	8.992957478	-0.276034643	0.966964611	0.268506674	0.997936524	0.356749116	0.967864996	0.271666647	0.007789378
F074	F	0	0.674633675	81.92331266	78.91767863	3470	55.26822547	233.3380951	0.067244408	3472	0.894919603	83.15109713	177.1731043	158029999	4.866227783	45.31272467	4.107048007	279.4605013	29.83436485	124.9198729	118.6924922	28.53618042	250.9243209	19.64438176	426.6874862	0.818031758	632119996.2	0.042151564	1505.312462	459.7219395	20.4094587	165413.4079	2230.717886	204.5370925	31.84145666	0.729365389	4.01238014	3.415686175	14.52615043	0.003862417	8.500339463	-0.249323405	0.947311126	0.243122463	0.988613777	0.332335953	0.931287144	0.252002633	0.011513376
F075	F	0	0.578936327	123.5158044	125.9364919	5982	71.50778616	381.2203461	0.063727908	5984	0.719203952	87.0182207	167.6087261	279469732	4.587075389	41.63557305	2.840034327	233.7096019	24.43596145	131.1611247	135.340359	38.95077221	194.7588296	17.38646598	432.2167491	-0.188007515	1117878928	0.048584103	911.402746	418.4576133	19.82464604	41885.40374	-399.3696291	123.2302253	21.4724552	0.703553563	3.524686551	3.25503806	8.352451108	0.004148961	8.354816037	-0.175315176	0.875604785	0.256359496	0.987236695	0.346176178	0.923075753	0.260031517	0.012610159
F081	F	0	0.850407391	110.302371	115.3776408	8070	93.80195162	342.1076477	0.042392521	8072	0.930848314	19.55312286	114.4349562	273644618	4.909050287	44.07333999	7.859647208	299.6027882	30.17581174	65.8338826	60.00950583	-30.96518807	330.5679763	18.89762819	368.2416217	1.534448572	1094578472	0.041826731	1767.462322	483.542996	20.64364264	501434.179	6187.724105	256.5906915	27.06113712	0.809315602	3.736653543	3.361123216	12.33478806	0.003506466	8.720459505	-0.223778241	0.933516231	0.253943489	0.994198714	0.343426805	0.94941665	0.255583054	0.011752048
F082	F	0	0.908781658	92.96529247	101.3903348	6078	84.48515264	318.1076477	0.052337553	6080	0.868782711	46.75130915	158.8849033	264797598.9	5.114199594	38.54834751	7.247327784	395.8028268	35.32192542	113.7983204	116.2444974	-46.19770232	442.0005291	18.16538721	417.3834528	0.738385013	1059190396	0.043228012	2979.896643	1199.267238	33.37227168	1151179.532	4269.026182	405.4313407	63.20213612	0.728913568	4.996048899	3.680171897	35.80063426	0.003712196	8.83417298	-0.267318702	0.960904307	0.227034625	0.992765231	0.315065332	0.950805851	0.236592121	0.013758978
F083	F	0	0.812646253	79.21813875	93.38094024	3810	64.3763236	260.1665222	0.068285176	3812	0.841038755	87.10121581	161.1512518	172027672.9	4.535126273	39.39323838	19.58613051	413.8660848	23.40797561	123.5963381	121.2156985	46.50651235	367.3595724	15.6359113	424.8667131	2.325796414	688110691.7	0.05062381	1077.866251	287.7086911	16.13592648	255305.6568	2906.223235	136.016249	26.66580957	0.671749206	3.600606079	3.252060614	13.19370837	0.004370386	8.209640222	-0.183812218	0.887454241	0.252625803	0.995486466	0.343430165	0.955426724	0.259441495	0.011029911
F084	F	0	0.876406026	134.2141264	144.0138882	11258	117.6260691	468.5340546	0.041617877	11260	0.802776021	81.28883473	147.0289522	485684968.4	4.456396269	33.25053879	16.02789034	429.8439141	22.4207728	114.0892255	109.7175481	20.24257722	409.6013369	14.26731751	415.3728742	2.412487722	1942739873	0.056300143	1064.737976	397.5370142	19.24788778	278620.0915	3797.096976	136.6013317	28.37916803	0.656021484	3.753911998	3.353286306	13.55724293	0.004568702	8.294704883	-0.135330784	0.81131913	0.249678593	0.995974026	0.340002914	0.957862315	0.254055175	0.01204473
F086	F	0	0.953311141	115.5422075	124.8679302	9778	110.1476737	404.3330445	0.041351303	9780	0.866943336	66.92592032	150.8413492	402885045.1	4.666264382	45.4979371	3.028513327	228.3386583	26.51388996	104.6191166	99.21627983	32.90710001	195.4315583	19.00657036	405.9299934	0.623748729	1611540180	0.045663074	1062.529985	267.2614339	15.39279062	59167.19434	1051.856084	145.5099123	24.21864716	0.71481195	3.761833291	3.336967471	9.340303649	0.003612836	8.588638534	-0.157834998	0.856056869	0.238184798	0.985670555	0.329582322	0.9184683	0.252467255	0.010377436
Y001	Y	1	0.622720744	278.9972138	305.712283	34804	173.7373526	966.7249635	0.02777626	34808	0.684095256	-5.152759561	105.2947734	1031173188	4.994768643	58.46281737	3.673934068	292.7360526	35.04057376	41.43650927	30.31242856	-43.35861565	336.0946683	24.44137029	344.2359841	0.964083487	4124692751	0.037827843	1919.522887	374.7994789	17.53846864	274481.4514	4416.880965	280.0474055	11.25531352	0.922363614	2.49119476	2.85018255	4.814922051	0.004133134	8.52388257	-0.2825739	0.9648494	0.337656146	0.997597493	0.417442566	0.965589193	0.335393906	0.011421529
Y002	Y	1	0.81223126	121.5146036	132.8006024	9222	98.69795951	432.4163056	0.046889645	9224	0.787255002	9.100830467	126.4019498	308644359.4	5.181367797	54.91671206	4.785859892	311.5143845	36.75120936	62.61945673	55.43083689	-39.69998883	351.2143734	23.99287314	365.8470191	1.065873674	1234577438	0.033733035	2351.170974	516.8005143	20.92470256	596876.9944	7277.384056	348.5631393	32.73425762	0.828480065	4.324344593	3.548325383	13.07672268	0.002409078	9.212432581	-0.221942261	0.94042215	0.218280018	0.99367454	0.31038232	0.944777391	0.221562871	0.006781299
Y005	Y	1	0.623754777	110.6921241	118.4060809	5880	69.04474123	314.7939392	0.053536384	5884	0.863509725	38.72824887	113.1509185	207762913.3	4.564181249	37.04401136	7.399981292	260.4368012	23.82389355	74.41746168	69.56894632	9.820746371	250.6160548	15.27898313	375.8180864	1.401779051	831051653.1	0.051971933	1050.798432	225.524859	14.1436126	133634.4482	2222.911539	131.8131577	29.90638639	0.62814709	4.006479442	3.450386497	13.01865026	0.004234297	8.384069015	-0.14866956	0.836194671	0.238670564	0.989550064	0.328486057	0.932147493	0.246454088	0.012897479
Y006	Y	1	0.536777067	171.7489059	179.7998888	11814	92.19087399	466.1909089	0.039460886	11816	0.826493829	36.12111969	113.0216842	409534236.3	4.568757035	38.73108901	3.803876631	218.7461086	23.8418074	71.10095735	66.72538723	2.447114972	216.2989936	16.38064911	372.3401432	0.776569196	1638136945	0.04986113	921.2616933	236.9692247	14.49196326	57667.1583	1060.634523	124.5540783	16.76062672	0.762003348	3.065219741	3.102551698	6.921680061	0.004687353	8.25680293	-0.178934494	0.877121006	0.289191983	0.991670503	0.375491907	0.937742003	0.290664415	0.01148991
Y008	Y	1	0.779028929	61.67766882	63.81222453	2210	48.0486883	191.1959595	0.086514009	2212	0.87161031	58.7177111	128.2107557	85608706.72	4.43948268	36.01107734	3.71767059	198.522935	21.87871055	92.45403947	89.93419295	37.64382705	160.8791079	14.85205859	393.4562084	0.6437402	342434826.9	0.053932356	787.6148195	153.346383	11.61638542	35176.85256	628.6700274	95.65432217	22.05489149	0.625489616	3.599105943	3.275826349	8.640064323	0.005185721	7.953026552	-0.187997044	0.891149021	0.242864802	0.98114065	0.334707777	0.907259444	0.260364701	0.014204535
Y009	Y	1	0.714794325	457.0222746	466.5318853	116378	326.6769282	1343.259018	0.011542207	116380	0.900286239	-23.60470644	161.1620053	4197941163	5.793551492	92.94352343	3.928579665	564.4354318	55.98750434	73.06286971	71.33074645	-66.18658342	630.6220152	38.82476351	379.8472555	0.56499647	16791764652	0.020731316	5108.032792	1032.911023	29.10961165	2273912.795	10783.46591	777.4249878	35.26396534	0.913155314	4.190756929	3.549870163	16.7402708	0.001408158	10.03191992	-0.267464737	0.972327719	0.243734949	0.997848996	0.331250689	0.968984788	0.246830204	0.003785772
Y010	Y	1	0.651938969	233.3867163	237.8066441	27650	152.1538952	650.7594514	0.023535604	27652	0.905799373	-47.61868121	201.0315351	868800525.4	5.30369788	120.2405922	5.722525658	605.1972112	85.60641836	36.40039519	-14.59692229	-53.58696246	658.7841737	54.71109962	354.5085868	1.732477199	3475202101	0.062031131	12511.11223	829.9994788	18.69855927	20810347.2	146948.7073	1966.345915	44.89363865	0.955368568	3.515278383	3.335471613	31.86621607	0.030232013	8.431035897	-0.408030522	0.992752651	0.416234046	0.997577973	0.477864776	0.975727777	0.267488359	0.162631508
Y011	Y	1	0.734818347	327.834437	352.9589211	60062	240.8987592	1069.518903	0.017806915	60064	0.81229983	-32.07476794	127.5561467	1841981250	5.583216867	87.83071314	3.411515736	327.1821618	50.259979	44.57739942	39.07604087	-74.79192774	401.9740895	35.89822492	350.239781	0.686246372	7367924999	0.023705676	3934.320028	738.4632052	24.33976331	1246753.34	10163.00156	607.8966201	23.74139206	0.924815354	3.565539144	3.306408874	10.19694228	0.001917761	9.594177542	-0.281364346	0.971993493	0.268223153	0.996444498	0.354546441	0.959226959	0.273089198	0.004871713
Y012	Y	1	0.779536888	194.302634	201.4447815	22742	151.4660706	587.9310242	0.025852213	22744	0.90927004	-2.28231645	159.782025	784666419.9	5.520142485	86.16179143	3.991715324	331.8135523	52.91152946	65.40779866	47.01321328	-41.58735774	373.40091	36.29677736	371.4831384	1.14070122	3138665680	0.026939126	4476.862786	671.5869663	22.58924528	1774370.907	19750.13324	683.553048	38.30181261	0.893913709	4.34862878	3.607204281	18.5616869	0.002085363	9.64234206	-0.253085336	0.96423458	0.236858005	0.993647733	0.325037376	0.948433291	0.240918887	0.006608348
Y013	Y	1	0.546470967	487.5962433	501.3940566	99482	266.4571906	1365.685425	0.013727965	99484	0.818703244	-27.45375812	127.4264619	3152772816	5.513540656	93.96772814	3.358428537	374.0137548	50.64488082	50.6368736	49.27340523	-62.34532531	436.3590801	37.9475341	356.0407563	0.586265982	12611091264	0.024720911	3818.80301	696.8663074	23.56578946	1136825.522	7897.065731	587.2450739	21.16694836	0.930429442	3.412694995	3.267023265	9.042035839	0.002078515	9.468506727	-0.281398778	0.973737833	0.270455194	0.997302653	0.357789146	0.963707909	0.275029065	0.006648799
Y014	Y	1	0.78066269	88.67018839	88.83692926	4678	69.22150782	279.9655121	0.059847266	4680	0.866025152	-34.36053397	20.18678997	99308195.89	4.116632775	27.96432832	4.35074122	94.57208556	17.41496071	-9.541735845	-13.3895289	-62.65176865	157.2238542	11.52311763	291.3396641	0.939419588	397232783.6	0.070792607	512.7966887	143.4261893	11.43139435	17091.97371	466.4887016	64.10962536	13.11513022	0.658804098	2.698279995	2.942016273	5.499370601	0.008082241	7.509057542	-0.161041879	0.834313603	0.321937493	0.987840661	0.403833023	0.926336583	0.317069529	0.021423179
Y015	Y	1	0.801357447	232.1554356	233.0064377	32950	186.0394872	728.2152955	0.022100616	32952	0.883634868	-40.41145426	65.35019006	789235539.2	4.908354605	63.03758327	2.515975049	157.7272667	34.12378772	6.858452932	0.045887153	-66.19793789	223.9252046	25.96257498	309.5226413	0.559336386	3156942157	0.03757055	1642.155362	306.2815346	15.74095505	144240.9901	2055.318097	245.754365	11.74375834	0.908769643	2.571246792	2.868058408	4.751626003	0.004191977	8.450324592	-0.272849649	0.956764553	0.332137428	0.994572142	0.41226535	0.949008014	0.329398385	0.014090877
Y016	Y	1	0.876625187	105.3277522	112.8716085	7502	92.33296048	341.137085	0.045472819	7504	0.90004563	5.128299568	109.973949	241135521.9	5.011012375	56.92101525	2.830020879	202.8146776	32.58339379	56.26009686	54.53617196	-32.23406694	235.0487445	23.43316081	358.5206529	0.354026092	964542087.4	0.035102245	1615.801945	390.5924744	18.4220425	138657.752	1045.183957	226.1356756	21.27152353	0.827475824	3.534089867	3.252211952	8.011156062	0.002947848	8.819473574	-0.229710138	0.936907725	0.257061984	0.991056999	0.345859319	0.934325663	0.264218117	0.007291869
Y017	Y	1	0.846931436	99.34892821	102.1567423	6434	84.14173043	310.3086579	0.048229509	6436	0.916329287	35.58889826	119.0452826	225475323	4.671929898	44.44567649	3.414701489	214.400044	26.26054422	72.87820286	67.3729292	-10.38141371	224.7814577	18.11717877	374.3445259	0.736986934	901901291.9	0.04670628	1095.66993	349.9752346	17.7979305	79113.96093	1448.91587	149.9888273	17.16779575	0.794119109	3.183002073	3.155276778	6.748197283	0.004237503	8.363773449	-0.196030548	0.908455338	0.274497765	0.992115473	0.362920099	0.937851245	0.279922763	0.013025992
Y019	Y	1	0.658316488	128.4916218	139.78555	8258	84.58815324	386.3086579	0.04677993	8260	0.833888395	42.47470407	164.7409864	339837092.6	5.274949337	60.42644174	3.843901471	318.7133453	38.01498673	102.7146494	100.0310929	-21.24069178	339.9540371	25.71494049	405.672307	0.574906278	1359348371	0.030799735	2390.931777	740.1964634	25.90205696	428977.4016	3379.516302	332.413071	55.30003961	0.715112689	5.508228211	3.874033561	22.84442873	0.001843389	9.551770297	-0.190217717	0.915635957	0.188468191	0.988933207	0.278246468	0.929887674	0.190578014	0.005628264
Y020	Y	1	0.895728543	255.9921217	264.8244702	45690	229.2994501	818.038672	0.017904108	45692	0.926278697	-38.73624308	179.8654541	1524434399	5.846741355	137.7304612	2.643720045	411.5676621	71.9308756	55.2563259	36.23134576	-96.54900021	508.1166623	55.59686734	365.3122888	0.689905535	6097737598	0.020644353	7246.011226	1256.726476	31.39390165	3173960.842	25235.18878	1119.574873	34.98799094	0.939372195	4.052869028	3.52973135	17.8514636	0.00188921	9.936358638	-0.298602713	0.982223395	0.262816305	0.996777747	0.347265955	0.963575439	0.263193577	0.007603173
Y021	Y	1	0.4234923	547.4498049	555.3413365	97394	231.8407772	1406.974747	0.014446216	97396	0.786293582	56.71663215	219.1411375	4652088377	5.715495557	83.09901276	4.333519638	454.4732494	51.78561911	131.8881459	123.052491	-56.10070687	510.5739562	34.61153199	437.1026238	0.848015041	18608353509	0.023226908	4531.333197	1675.415534	38.92309907	2044535.307	15201.3869	684.8602994	43.23028443	0.881270132	4.881211794	3.729118751	18.02736349	0.001313664	10.20430478	-0.215201177	0.945576332	0.20437564	0.996000074	0.294924527	0.956252887	0.21022655	0.003473137
Y022	Y	1	0.935367512	130.0655771	136.0147051	12358	121.6591153	434.391919	0.035150665	12360	0.907187986	-19.44535848	43.37900302	302290232.6	4.308988414	32.95108832	9.101232444	225.2380537	20.07769072	11.61663545	8.944924683	-42.8663396	268.1043933	13.57611861	312.7755653	1.477019937	1209160930	0.05950985	723.6267579	156.7395773	11.64900475	71313.1982	1206.005434	95.67577573	11.5199112	0.784303673	2.536692718	2.85688705	4.80953915	0.006523535	7.737616081	-0.191734533	0.881757809	0.331731992	0.996267639	0.412176254	0.957291662	0.333572997	0.014934979
Y023	Y	1	0.635575936	203.6353718	212.5088233	19978	129.4257419	576.1320344	0.028838324	19980	0.869678858	101.1978012	227.794316	1066505489	5.28448458	66.40062733	3.348609506	360.5336778	39.38270861	159.4045032	153.6547957	22.78896721	337.7447106	27.39033202	462.076414	0.648661399	4266021955	0.029903978	2462.114799	884.50015	28.34609637	432969.3546	4598.93014	356.4850515	32.49314064	0.832539166	4.27899574	3.539733641	13.29264901	0.001933727	9.486301198	-0.201244377	0.92689103	0.219234161	0.993381439	0.311187193	0.94391611	0.227881866	0.005463184
Y024	Y	1	0.774643074	336.5272837	333.2566578	67938	260.6885295	1044.832611	0.015379208	67940	0.884330475	-9.374787503	107.0616176	2070463242	5.188171019	63.75019991	4.134277098	326.7018542	37.44208515	45.94714883	39.72640166	-58.62847824	385.3303324	26.44790489	349.1411088	0.832683619	8281852970	0.031876349	2220.084053	541.4142025	21.62720206	421276.068	4744.875931	324.4947223	29.78231292	0.831918361	4.027272658	3.459532877	12.58578222	0.002215804	9.369571133	-0.193043352	0.911943077	0.237260593	0.99522692	0.327139396	0.952684321	0.244120667	0.005327299
Y024_1	Y	1	0.531486745	629.6964414	626.9960127	162646	334.6753122	1681.082395	0.010335836	162648	0.850428147	-9.240907868	135.3043567	5470621523	5.544927347	76.69206477	4.781233028	375.6211629	46.57019409	61.78929314	56.39411644	-82.81695636	458.4381193	31.72822851	366.7954729	0.936103786	21882486090	0.025426738	3647.426326	1023.28535	29.87106317	1463662.54	12080.26049	553.3283115	29.30899939	0.89938869	3.938306727	3.434076673	12.78655424	0.001764863	9.750497157	-0.24102988	0.955084663	0.2457205	0.99667412	0.334513371	0.960690165	0.252401724	0.003894785
Y025	Y	1	0.700208948	89.22736455	99.2975327	4190	62.47779906	271.764502	0.064860263	4192	0.844343599	43.14580231	96.69159892	141543582	4.075655642	26.66638898	3.486306721	149.805577	16.53362816	66.88663294	63.51868826	5.661918232	144.1436588	11.02709185	367.5060134	0.540440313	566174328.2	0.073285721	454.8684641	173.1659272	12.73376558	11403.05486	222.9161934	56.75552379	12.69439436	0.633838153	2.712517476	2.931273161	5.057594526	0.008405275	7.469888854	-0.151624743	0.822209703	0.310138362	0.985696308	0.393750241	0.918953995	0.322241596	0.025544182
Y026	Y	1	0.574862306	217.8383917	218.0733821	21110	125.2270801	583.2447327	0.027628836	21112	0.883076288	-5.277312385	83.73227032	621166674.6	4.875127153	47.86725424	6.797715633	298.8336084	29.07721061	40.85636878	39.23335446	-43.57723111	342.4108395	19.60857721	343.0594453	1.159034515	2484666698	0.04069363	1506.71884	355.6710403	17.5233705	324297.5048	3669.773196	215.3280323	20.92178461	0.822736167	3.357264381	3.227999692	9.038131983	0.003439416	8.702514045	-0.208577049	0.917189404	0.276106174	0.995705701	0.362912713	0.955239119	0.277653378	0.008546668
Y027	Y	1	0.527713052	133.0792953	135.4400236	7066	70.22768114	353.9066376	0.050085853	7068	0.841982452	60.47962852	190.1854302	324373483.3	5.293900365	69.42955663	2.757987843	303.7322806	40.15638566	125.6294624	124.2492535	15.61374254	288.1185381	29.1615645	428.4541932	0.244440919	1297493933	0.028779847	2412.556406	587.0923719	22.5605727	313789.4899	1235.642886	348.0791634	35.632641	0.813996647	4.283585501	3.525816712	15.84085587	0.002188768	9.262421077	-0.24882331	0.953743493	0.233059359	0.989987526	0.322493731	0.934939408	0.239111405	0.007317864
Y027_1	Y	1	0.507286546	258.5342881	278.8691449	25148	131.1509661	784.9848481	0.031214603	25152	0.716135798	94.57621241	194.4200072	1281564164	4.984757761	50.06568019	3.84203592	263.1425524	31.64086396	149.6151614	156.4511691	-11.58409423	274.7266466	21.22924712	451.4544217	-0.775069388	5126256658	0.03868773	1657.301539	1174.481823	33.49498964	227645.0321	-3287.167235	235.3689394	25.10291492	0.80700356	3.835244713	3.370598975	9.574828606	0.002767002	9.052543863	-0.18010261	0.893907219	0.238004913	0.992219584	0.329150259	0.938465524	0.244844812	0.0073548
Y029	Y	1	0.70760399	150.310477	156.9840756	11002	106.3602933	463.8477631	0.042160313	11004	0.801613986	3.805287229	96.2782191	330514152.6	4.776373194	46.61446558	3.804298403	228.3117253	28.47505825	44.70999861	38.96044109	-28.15603239	256.4677577	19.59091638	346.6169011	0.887554659	1322056611	0.043252769	1318.292986	271.7121847	15.19361417	123044.2469	2192.157183	182.4776905	19.02287603	0.810966889	3.326698616	3.208285778	7.563961851	0.003761541	8.563832273	-0.195321154	0.908817764	0.263920523	0.993152958	0.353963221	0.942167691	0.269603715	0.010451322
Y030	Y	1	0.925130797	276.8445563	293.5029812	53590	256.1174251	958.5239533	0.017886247	53592	0.856138131	0.934115891	132.835946	1809837071	5.36547093	65.5851314	6.625278383	461.6147179	41.78479316	63.30830797	55.39788877	-53.57358476	515.1883027	27.65813774	367.5358888	1.299111172	7239348285	0.029161433	3089.702955	691.1920421	24.06763529	1372206.72	12710.27084	469.1948219	21.4361759	0.912470238	3.271752695	3.194468979	10.23610267	0.002447635	9.246920741	-0.27486699	0.968630926	0.280567287	0.998057746	0.367336631	0.970331892	0.286305518	0.00631076
Y031	Y	1	0.412846612	219.2886141	211.5183207	15318	90.53256142	539.5634919	0.035224148	15320	0.81313641	59.22511119	178.3652357	684447243.9	5.283045227	59.32158714	5.950509838	404.7031904	38.36145861	119.5366766	115.6421524	-12.42502187	417.1282123	24.87040232	422.7373324	1.130611195	2737788976	0.031458664	2695.829174	830.6149879	27.26630326	941614.2477	9123.748451	389.3576992	40.71293479	0.810322627	4.781914068	3.695983487	16.78936488	0.001944599	9.516424811	-0.196532749	0.924505011	0.203601571	0.994387459	0.29449806	0.948132422	0.212761448	0.00561253
Y032	Y	1	0.972967572	138.4885446	145.6021978	14490	134.7448629	467.646753	0.032273758	14492	0.912475477	18.30179873	94.31376525	458185854.7	4.595752814	39.4977732	13.36472659	359.6283506	25.27021869	53.85165796	47.9498802	-9.154841969	368.7831925	16.37015189	355.6204045	2.195682598	1832743419	0.050689811	1254.876267	210.7740496	13.10940066	448453.8714	5400.175923	175.5862609	19.9229902	0.795530802	3.236451637	3.180512983	8.969313141	0.004701471	8.297289999	-0.184038523	0.885855565	0.28011234	0.996453916	0.36724483	0.959492563	0.284697759	0.011335711
Y033	Y	1	0.486147371	221.9292497	213.7755833	18542	107.8903212	589.7056275	0.031803777	18540	0.818555156	72.93397579	179.7128627	849877752.4	5.08575223	54.39487225	3.698479111	362.1338034	32.9281161	126.1377655	124.0797527	12.31775671	349.8160467	22.66328927	428.2066042	0.438199682	3399511010	0.034705078	1767.500685	613.9273034	23.68809403	216399.9444	1413.102412	244.549575	33.35922121	0.759102445	4.347072147	3.548319399	13.41384121	0.002255277	9.270172721	-0.172859999	0.889631439	0.216234582	0.993567386	0.308183228	0.944544424	0.225699944	0.005928163
Y034	Y	1	0.827031003	84.58989524	89.30845425	4382	69.9584659	270.509668	0.06173201	4384	0.867477716	6.032548793	72.44486161	123993329.2	4.306870222	31.62627596	4.179771441	159.620595	20.84847737	35.27185385	28.76975706	-25.07829373	184.6988887	13.65694606	336.3518985	1.036637954	495973316.9	0.064011801	725.3836637	193.7894986	13.24714956	30772.55949	817.8793903	88.6680067	15.47616906	0.702219259	2.932834666	3.060466545	6.606032863	0.007305578	7.754504389	-0.172444621	0.865293088	0.29936764	0.989744886	0.384178026	0.931855965	0.305032743	0.026755298
Y036	Y	1	0.595561814	238.1721939	240.7072911	26328	141.8462639	662.3574311	0.025157909	26332	0.868403277	8.607053331	185.0169975	1029273441	5.74271283	93.41389162	3.497008822	425.2168705	55.64771057	89.20835368	77.9720079	-66.46501996	491.6818904	38.8557322	395.4152874	0.779649748	4117093765	0.021864857	4870.106899	1221.829032	32.3487081	1866203.566	15162.39343	745.9520629	44.39175687	0.887806527	4.854895632	3.733177724	19.47608054	0.001337045	10.09214038	-0.245041816	0.963506819	0.210234334	0.995661667	0.300183226	0.955380097	0.212962712	0.004365917
Y039	Y	1	0.612246847	212.0735557	206.813926	21214	129.8413658	610.0731599	0.028758045	21216	0.846319399	30.75385307	138.8392624	777140371.5	5.082368507	57.19564784	7.531776422	456.8074146	34.34122768	80.18140923	73.2822858	-33.99240454	490.7998191	23.50536144	382.778889	1.175676767	3108561486	0.035214821	1981.773958	607.8617217	23.37808912	431491.7907	4256.272065	272.8241455	27.53840327	0.815463285	3.783957418	3.378491819	12.47026449	0.002702672	9.075243643	-0.206035545	0.923374688	0.250601227	0.997260619	0.339957605	0.964290545	0.252831456	0.007648733
Y040	Y	1	0.85669238	147.9151231	164.0731544	14320	126.7177588	543.0437226	0.037922048	14320	0.781162962	-25.22292807	91.5016427	395750655.5	5.172140713	62.18442848	3.805083027	227.9606948	37.50928132	29.13127103	21.49675477	-67.75308713	295.7137819	26.36060708	332.4828956	0.830360143	1583002622	0.032468868	2217.48227	477.9054011	20.0281721	419250.0126	5135.510204	325.7736829	18.67833899	0.891226621	3.263766057	3.166300702	7.362886383	0.002845077	8.958427027	-0.259399896	0.956433654	0.277001596	0.994915649	0.364705529	0.950211123	0.273403028	0.008893446
Y041	Y	1	0.670452902	160.2284897	164.693655	13022	107.4256559	472.0487732	0.036250098	13024	0.856952804	15.1474615	101.4020074	416931431.9	4.784558907	40.46396445	9.334833848	361.3748763	27.79549366	55.70113374	50.64533456	-21.69541766	383.070294	17.17606522	357.8410179	1.731132938	1667725728	0.04563999	1526.897523	320.1350305	16.46402054	422883.3152	5551.684792	218.8592912	22.58103882	0.812896352	3.243582845	3.184391382	11.64520038	0.004204492	8.493551407	-0.216494299	0.926313054	0.287657191	0.996439208	0.372571596	0.961624816	0.299865317	0.010165627
Y043	Y	1	0.680576944	281.6664258	292.6567956	38778	191.6956752	899.2102448	0.02318867	38780	0.77631216	-4.064240748	111.157287	1167141550	5.041185552	62.02876661	3.722179366	277.80471	37.01078332	43.90483391	31.11616409	-43.35861565	321.1633257	26.08799184	346.9667502	0.989333462	4668566201	0.037032078	2115.39097	400.7281479	18.054303	341620.5827	5262.170405	310.4982471	11.42525866	0.928769746	2.507151502	2.859147576	4.895612415	0.004066344	8.578018667	-0.288730986	0.967892043	0.336769593	0.997333186	0.416512891	0.963889566	0.335579564	0.011479493
Y044	Y	1	0.651424468	310.7757568	321.8011809	48854	202.446932	893.5189027	0.018289575	48856	0.876902385	45.70679027	165.8391484	1994185529	5.276074596	60.80191046	3.980756231	333.8151038	37.90155158	101.0830572	95.01883322	-20.50406886	354.3191726	25.36858907	404.0674086	0.711801114	7976742115	0.031319492	2402.851868	738.3969721	25.62534256	502920.3452	4666.305219	354.2924388	27.34143758	0.856490856	3.925531056	3.4288635	11.18681474	0.00214842	9.435996098	-0.209661265	0.932603576	0.237384813	0.994847927	0.327817106	0.950137635	0.246658918	0.005452922
Y045	Y	1	0.716904644	160.9456081	166.0481858	14310	115.3826539	493.019336	0.034452784	14312	0.860123466	-3.11611635	77.96479141	398544188.5	4.589064188	42.3902011	7.688976927	299.8915722	26.58067044	31.91169598	23.4787694	-32.40955174	332.3011239	17.77322568	333.7475392	1.590572674	1594176754	0.051681273	1222.045995	229.2900153	13.76631416	227721.5722	3675.629213	174.6291181	15.51649965	0.836448436	2.857499302	3.007626225	6.981959835	0.005488985	8.142515583	-0.217252805	0.917110929	0.305100138	0.996639061	0.389412962	0.960417537	0.311379095	0.013541976
Y046	Y	1	0.926604271	316.7344834	343.6859031	70398	293.4875252	1168.229581	0.016594642	70400	0.805113101	-54.99828878	84.66804719	1742604998	5.376526288	74.84154612	5.513162734	386.890779	44.68501159	9.336699681	-0.30837889	-87.34432196	474.2351009	30.95656347	314.6611632	1.208227609	6970419991	0.028193498	3322.453836	529.1601576	20.22216471	1311795.186	12924.61738	500.5905934	19.6997268	0.923966018	3.118409688	3.138620744	9.299086842	0.002742766	9.165931163	-0.29142781	0.971418614	0.305551514	0.9978961	0.387127992	0.969456304	0.304677102	0.007084173
Y047	Y	1	0.474631469	96.77350436	95.35197953	3446	45.9317505	247.6812409	0.071874997	3448	0.840174418	80.87608483	261.0816013	178692149.6	5.478163572	98.67992373	3.249581818	387.6258458	58.56552012	149.6227517	123.3426141	36.94232054	350.6835252	40.74603302	455.3015237	1.045153001	714768598.2	0.029459897	5138.858561	750.5953463	23.8673235	1717754.68	20095.59729	785.4183954	61.71078638	0.854730947	5.524529815	3.889885551	29.60962781	0.002534135	9.152027713	-0.338428351	0.987257122	0.196353558	0.988553966	0.284719103	0.932175701	0.210074343	0.008698277
Y049	Y	1	0.745735672	105.6003929	107.5174404	6254	78.74997997	331.8477631	0.053061683	6256	0.844782631	40.15046476	149.6673151	247158481.5	5.100710017	55.45169902	4.88019431	343.2502037	33.8504313	95.0694487	93.70526073	-10.95965673	354.2098604	22.95673472	397.5295205	0.76760199	988633926	0.034595535	1949.850336	555.66505	22.33420331	355719.3293	3270.433707	267.9365141	40.56316651	0.737263289	4.79537494	3.68514524	16.51715111	0.002311194	9.158558814	-0.199097932	0.922977988	0.197916037	0.992434922	0.290010633	0.940144756	0.212021533	0.006892443
Y050	Y	1	0.73266291	177.8215879	194.6997689	16386	130.2832822	627.3279938	0.038284389	16388	0.723347091	-8.550209281	131.5023799	509928460.8	5.280417925	74.02606804	3.920966703	285.0982398	44.99807254	48.25312543	32.70527174	-44.11338002	329.2116198	31.40070628	352.7943685	1.100231626	2039713843	0.031814834	3183.627061	459.2188588	18.79048069	786757.4696	10567.90696	455.2931902	30.76062447	0.873041794	3.923454105	3.442890145	14.67771237	0.002656481	9.228638368	-0.240836377	0.953513021	0.245134009	0.99350036	0.334519554	0.947230109	0.255296423	0.008813189
Y051	Y	1	0.617905352	239.1517802	248.2982078	26606	147.773165	713.3868684	0.026813007	26608	0.810530972	21.93213071	122.3048383	938829999.6	4.976344512	56.59155776	4.289614903	315.7309476	31.95644903	73.57000367	73.42643409	-21.45345696	337.1844046	23.11257718	375.6793805	0.492542891	3755319998	0.035849991	1580.449289	456.3778328	20.0849432	222358.5474	1534.981543	230.697872	18.80918321	0.849044098	3.260134831	3.183747523	7.747793483	0.002839465	8.859640986	-0.215775511	0.930616813	0.272240318	0.996127462	0.36091288	0.956288708	0.275834917	0.006357584
Y052	Y	1	0.692931175	148.5869922	158.202402	10994	102.960559	475.646753	0.043264213	10996	0.781444722	32.47682725	125.9253067	384951921.6	4.77089769	44.3647587	3.861111993	232.1343716	28.50577008	72.39288505	65.28843086	-8.147459415	240.281831	18.87383272	374.2104197	0.981762504	1539807686	0.044755982	1356.977344	322.8617878	16.74573084	136872.0924	2600.054953	188.6011807	18.83780936	0.817801906	3.251423817	3.166077014	7.717582396	0.00413206	8.510584257	-0.204880231	0.911754337	0.273914573	0.992415731	0.361572806	0.940404946	0.2855922	0.011067781
Y053	Y	1	0.666387228	97.88645078	96.76776323	4662	65.23028057	306.3086579	0.065703273	4664	0.790190482	53.30853533	117.607773	173166612.1	4.297225071	34.0624775	2.723344317	165.6741319	19.77943018	84.60138779	83.47181831	22.10238591	143.571746	14.08003649	385.3743498	0.251143011	692666448.6	0.057551142	595.1619985	193.5362977	13.28712212	16828.47834	186.7338524	80.99671257	13.04627109	0.722382953	2.825416827	2.928493502	4.65204792	0.005839354	7.803122439	-0.178945962	0.865482627	0.292482768	0.986121271	0.379996882	0.917987641	0.300853262	0.013616997
Y055	Y	1	0.817999789	162.4315281	168.6179113	15622	132.8689557	559.7300141	0.0358296	15624	0.791579709	19.26512586	168.4901551	629564822	5.492590353	81.89182684	2.813875921	308.8810881	46.32025508	97.38522931	96.9796948	-23.94552239	332.8266105	33.51375053	401.4709328	0.291865299	2518259288	0.024958124	3263.889413	741.3573427	25.00682171	651198.7312	2435.267314	494.338342	30.27655014	0.884530935	3.973496995	3.465751204	13.71924717	0.001824232	9.536392514	-0.2645693	0.967928841	0.244069102	0.993512514	0.33318664	0.946481614	0.251004516	0.005287918
Y056	Y	1	0.63283756	275.8801252	283.8168423	36894	174.5873053	780.0975465	0.021144293	36896	0.872838495	48.46841861	146.2324407	1444221903	4.964300182	50.6729582	4.754222783	389.7801326	31.03347375	93.68166572	88.31285031	-7.499723735	397.2798563	21.15772484	395.6920425	0.855025831	5776887613	0.038331718	1586.938535	500.4248364	21.17614774	248528.1834	2970.825285	231.1534164	23.17385027	0.817738108	3.564256366	3.298822552	9.736714397	0.002998159	8.961235707	-0.194094254	0.906106988	0.261163519	0.996445386	0.349661906	0.958696021	0.264075855	0.007783679
Y057	Y	1	0.716996693	271.6063643	293.9931972	39434	194.740865	849.1025971	0.021532246	39436	0.82904896	-35.70596762	120.0394847	1130360293	5.400551031	91.70543865	7.011314118	502.3784015	55.90583802	30.72547759	6.219199427	-55.4127602	557.7911617	38.04044555	338.6039448	1.707612818	4521441173	0.031689946	5273.28989	540.2547135	18.58168304	4300337.544	37919.93602	812.7037016	32.80658299	0.922417306	3.426730345	3.289575535	20.49024509	0.004125892	9.036360509	-0.324672471	0.982757294	0.328037065	0.997524593	0.403122235	0.971898717	0.316786469	0.01387991
Y058	Y	1	0.759703063	149.6339874	161.245155	13230	113.6773985	484.1320344	0.036593502	13232	0.842211241	-16.44542876	72.04986591	361305209.4	4.800716204	46.54710266	3.263410534	175.2491135	27.44837831	28.67039517	28.82028441	-51.7709871	227.0201006	19.11708019	330.4869851	0.266283526	1445220838	0.041661488	1197.418686	329.0801156	17.06904508	92855.30783	318.1269497	169.0964603	18.18791572	0.805528151	3.182246097	3.157310784	7.567374069	0.003687816	8.524591416	-0.216265781	0.923488539	0.284479454	0.99204354	0.369959855	0.939372171	0.293304011	0.00930745
Y059	Y	1	0.704589449	233.4065506	244.8264692	29514	164.4557928	710.8427125	0.024084933	29516	0.856732916	-8.517579605	218.3687098	1225145823	5.953580853	128.6928194	2.180787429	311.7211574	69.10325533	99.02568387	92.48007047	-53.38298743	365.1041449	52.48410996	407.4695284	0.305349953	4900583292	0.017300702	6809.920189	1241.248351	31.32849039	2440938.29	9878.034565	1068.384587	29.29324469	0.946641928	4.016534396	3.474104394	12.33729061	0.001249229	10.09673184	-0.304951085	0.984285551	0.240753833	0.994771206	0.32955726	0.950442441	0.248572159	0.003979426
Y060	Y	1	0.843722605	184.9567418	191.7706964	22066	156.052184	611.6122651	0.027717405	22068	0.860975023	9.955668388	139.9195122	764937056	5.284898189	66.33781839	4.445242364	361.7327012	40.33533155	68.74945941	61.6376624	-36.69888606	398.4315873	27.83721349	372.3585736	0.974534878	3059748224	0.030362987	2674.743553	578.6451491	22.10557932	629135.1466	7054.120557	389.24789	29.30164158	0.859837968	3.991249226	3.470254321	12.68031199	0.002210644	9.364575682	-0.223689414	0.944102117	0.239564105	0.995633188	0.328988891	0.954685029	0.248457433	0.006053556
Y064	Y	1	0.570372748	346.7591622	393.5123886	49522	197.7819764	1060.631601	0.021417382	49524	0.74377137	-9.590173682	150.7160318	1745345326	5.559636349	77.55539767	3.1541704	323.1513227	47.41827661	70.59374225	68.70228328	-51.98072681	375.1320495	32.86635685	375.4592617	0.470178209	6981381304	0.024443809	3629.935411	777.4822712	25.49049247	905614.2387	5191.064508	543.3592902	32.49760994	0.886981104	4.171737677	3.537934943	14.31066252	0.001642812	9.764550577	-0.241400048	0.959217987	0.234403324	0.994533233	0.32373957	0.950023397	0.241677648	0.004396275
Y069	Y	1	0.688815989	164.5753561	183.6191711	14026	113.3621367	496.3330445	0.035386642	14028	0.845860333	-5.703578362	102.8520325	418750635.2	5.019870824	59.07329877	4.367483732	312.7466016	35.06002565	42.74592926	34.2268162	-35.41755341	348.1641551	24.73918739	345.5491719	0.995460774	1675002541	0.036352323	1929.458141	345.7636431	16.81626851	304531.7189	4371.846037	276.9873674	25.0903293	0.833697049	3.539729905	3.307215781	12.05952881	0.003126257	8.871104078	-0.225075609	0.938906581	0.26441315	0.995222018	0.353237018	0.954436306	0.267570002	0.008119371
Y070	Y	1	0.669241248	98.42646478	104.7854952	4990	65.87105016	305.137085	0.061149716	4992	0.820654229	83.19775518	146.1651556	216204815.4	4.327777743	29.82731145	6.436610797	281.3476455	19.15994681	115.42759	115.2815922	35.08082734	246.2668181	12.51194633	416.222342	0.673927043	864819261.8	0.060846072	660.9554835	285.5998784	16.39526109	46504.74572	456.9190404	85.17619886	18.00109241	0.650431476	3.109461073	3.105789325	7.915091747	0.005909427	7.893905107	-0.163210372	0.85010274	0.286238575	0.993132694	0.372405422	0.943952978	0.29531222	0.01464819
Y071	Y	1	0.70152602	244.6836421	244.8591432	32782	171.6519417	713.5878785	0.021767674	32784	0.899446199	61.58328969	167.6229219	1430831174	5.089505636	58.24263771	2.871863765	290.824504	33.53348933	115.7544198	116.787241	-23.21844069	314.0429447	23.90242852	417.8238457	0.073479528	5723324696	0.033700866	1725.028408	879.9076781	28.67581755	183058.3443	96.25102135	254.2526555	23.8326512	0.828732618	3.716049565	3.342066319	9.335321279	0.002338704	9.187765462	-0.196194878	0.915501899	0.245237791	0.994311407	0.33571706	0.947074887	0.252412771	0.005716404
Y072	Y	1	0.847306582	89.05688317	95.85405573	4922	75.45848331	293.6223664	0.059655093	4924	0.847006225	7.968181934	98.65823252	152512555.2	4.77629097	49.25889449	3.05607732	184.1927878	28.53707439	50.17281555	45.6352582	-22.35559275	206.5483806	20.23670586	351.9846888	0.64144971	610050221	0.042061925	1272.220411	273.068924	15.27084924	91553.47866	1413.352288	175.1502953	15.68527593	0.835273125	2.979073766	3.07937247	6.490636285	0.004477344	8.2862452	-0.249887038	0.94622615	0.297294843	0.991413706	0.381953657	0.936698208	0.300081013	0.01419709
Y073	Y	1	0.687654992	182.2521516	180.8977612	17842	125.3266018	521.9898987	0.029256244	17844	0.907119704	49.49117485	153.3245721	716816461.8	5.050194704	53.83614053	7.689569438	391.2863353	33.59233149	98.32564475	91.81354473	-10.259797	401.5461323	22.41286979	400.8555247	1.421294361	2867265847	0.036307843	2021.832444	598.692049	23.05721916	652302.7962	7023.25743	295.9733135	27.74865495	0.828728198	3.693185197	3.368299913	13.44387622	0.002960448	8.973082054	-0.221536885	0.935445926	0.263636307	0.995998022	0.350865565	0.958570892	0.267952817	0.008177709
Y074	Y	1	0.876211703	91.26208993	93.91485505	5578	79.96491124	298.5929291	0.053530464	5580	0.886675417	28.21055857	88.37287546	177652796.8	4.221274835	29.87513228	3.917956729	173.7761554	18.6122194	56.06022353	53.36060998	-9.691274274	183.4674297	12.65113934	356.8608625	0.755824936	710611187.4	0.063650261	570.7923752	194.4182401	13.49284808	16095.06652	364.5073792	66.65725704	17.2207078	0.587829746	3.182713745	3.126950952	6.618902802	0.006142975	7.814202783	-0.12680091	0.776152907	0.275336738	0.987949792	0.362867864	0.924577427	0.287319323	0.015187149
Y077	Y	1	0.639364339	112.8182601	128.1561547	5670	72.13197233	409.9898987	0.072308624	5672	0.651063434	42.78389726	147.7076195	222439871.4	5.038894296	52.46447656	7.592486828	356.4175333	34.09648804	93.32208839	86.7193023	11.04380211	345.3737312	22.00488696	396.0665836	1.55360556	889759485.6	0.037003587	2166.473432	346.0919614	16.7228361	691398.5743	8268.600426	301.4471816	35.71580571	0.788123244	4.153904142	3.522687673	17.75323129	0.003139635	8.800136616	-0.238544088	0.948750193	0.24167669	0.993103921	0.330422829	0.946769214	0.246914989	0.011167851
Y078	Y	1	0.567040113	145.1349164	144.554488	9158	82.29731943	417.7056275	0.04561101	9160	0.812147525	-2.587099142	78.38742356	263664672	4.733542081	40.93848318	8.799969521	297.9894655	27.12058181	37.19406759	32.08882268	-43.05122056	341.0406861	17.00682349	339.3190407	1.716079886	1054658688	0.046660819	1437.572149	323.2182292	16.70410291	391914.8671	5398.463535	200.6306056	23.88341632	0.786969638	3.639681595	3.328818544	10.02064156	0.003893287	8.531222022	-0.18548275	0.89475491	0.253810269	0.995105202	0.34297301	0.951679814	0.261901128	0.011102632
Y079	Y	1	0.722905657	251.074847	266.6608333	34590	181.5034273	812.9848481	0.023503465	34592	0.810956878	42.23215338	135.0623984	1310429691	4.936393507	45.27067319	8.91788551	414.0947737	30.42400568	86.9220674	81.57405497	-18.67950678	432.7742805	19.06475745	389.2682851	1.678752228	5241718766	0.040918301	1821.111558	533.279579	21.81287347	578270.7117	6880.168156	260.509042	30.59964727	0.789649993	3.82586208	3.414215968	15.28778227	0.003179444	8.945778082	-0.185141366	0.901144808	0.254820935	0.996109742	0.343303901	0.959530866	0.260359552	0.008316259
Y080	Y	1	0.81088306	109.2113015	114.5425685	7162	88.55759434	359.3624817	0.050176275	7164	0.834813294	-6.19935392	94.2348202	209014370	4.91437889	55.27227514	12.43144638	380.8276778	33.7481442	38.54020815	28.37533222	-39.7092764	420.5369542	22.64236586	341.6176335	2.109601843	836057480.1	0.040553596	2093.134968	323.5453743	15.98792851	1070577.414	10886.62417	302.1863142	30.46565229	0.816493289	3.7319985	3.350736578	15.90654986	0.003656611	8.640515977	-0.23414177	0.941928083	0.257441499	0.996010938	0.345521986	0.959680624	0.27251667	0.012163802
Y081	Y	1	0.563877107	204.9982412	212.339351	17090	115.5938151	607.0437226	0.035520405	17092	0.763406742	48.6471455	122.7325613	630177303.8	4.583479809	39.29490608	6.146692364	307.5681532	24.06192362	82.73990535	78.14621102	2.918007066	304.6501462	16.24084179	384.0298056	1.11925054	2520709215	0.050428433	989.056463	313.9969774	16.86219879	108166.0826	1724.34859	134.8859971	16.24036975	0.783780195	2.976317013	3.059331639	6.973637754	0.004777382	8.263328761	-0.185496033	0.885936262	0.294774362	0.995886063	0.38067827	0.955734981	0.297416312	0.011188625
Y083	Y	1	0.748000823	118.9232913	134.4618905	7298	88.95471974	385.9898987	0.052889819	7300	0.784568599	-3.040097577	95.27285173	217026222.6	4.852042494	56.87001654	2.400764219	150.2814025	30.83008831	42.84687235	38.80772022	-37.50633262	187.7877351	22.87725716	344.8455859	0.369966713	868104890.4	0.038372077	1374.500251	326.1901008	16.74183153	92559.12924	1114.821156	198.3593356	14.76896082	0.861316867	2.966022101	3.0374463	5.615779881	0.003678226	8.489786803	-0.241931713	0.944024972	0.287769067	0.990594763	0.374881771	0.932303016	0.295526665	0.009538515
Y084	Y	1	0.406603567	494.9237528	510.4742893	71686	201.2377633	1290.607214	0.018003616	71688	0.735407437	45.05890169	176.5223893	3040613615	5.345597129	69.40504842	2.926847974	361.7334703	40.49894517	108.8361243	105.1127912	-18.96500314	380.6984734	28.92181968	411.8958169	0.326865506	12162454458	0.027988872	2511.187394	767.3863041	26.17205167	376121.5236	2048.034636	364.2306774	34.59842506	0.826271079	4.450018105	3.599812656	13.87167362	0.001641531	9.712026121	-0.181209518	0.91002517	0.214643348	0.994302489	0.306074224	0.947347684	0.219396097	0.004420767
Y085	Y	1	0.796174032	253.3780939	256.0312481	36678	201.7330587	836.4995667	0.022806575	36680	0.811599993	-23.57201503	85.18595323	1007317799	5.092029689	57.37155316	8.387004966	366.8093269	36.16592929	27.74687968	18.37361716	-61.04989894	427.8592258	23.54278027	331.435166	1.735269534	4029271196	0.035860405	2431.252106	451.6866071	19.05253138	1157752.952	12509.67995	373.9736903	19.22349132	0.902267672	3.136788359	3.1626479	8.936055031	0.003346756	8.871576331	-0.259158959	0.957436619	0.296246135	0.997502227	0.380003742	0.96624108	0.299050697	0.008450282
Y086	Y	1	0.639301923	219.8866108	212.9600902	23390	140.573933	623.646753	0.026662965	23392	0.869323415	24.59593202	121.9612347	828290275.2	4.932058918	51.38011145	2.983878122	229.5346763	29.94546507	74.4787788	75.10991544	-30.00394973	259.538626	21.14482045	376.3462554	0.14090103	3313161101	0.037597827	1402.1482	545.4227661	22.35178971	116151.261	130.6594047	201.7755477	18.50162195	0.831641689	3.304958542	3.178367416	7.100440134	0.002970698	8.810463184	-0.208665506	0.92254909	0.263119424	0.993572164	0.35292504	0.943429028	0.274622971	0.006795834
Y087	Y	1	0.943901658	79.47183849	84.40379138	4658	75.01360011	258.3086579	0.055454843	4660	0.936624926	94.05614713	168.6235193	219977139.3	4.589742251	37.78831026	3.317639161	238.3833684	23.39355869	133.5038574	134.3613623	46.53339827	191.8499701	15.93143689	434.5360501	0.076165145	879908557.3	0.049239441	895.9844821	354.2992973	18.16250433	47911.80452	77.33551984	118.8286508	21.14285872	0.69729649	3.536438005	3.267373889	8.08669018	0.004186029	8.338847622	-0.177501954	0.882705242	0.252985125	0.986732481	0.344515347	0.920947133	0.246944192	0.01230103
Y089	Y	1	0.574893543	195.6458284	207.5090359	15298	112.4755235	631.9310242	0.041308081	15300	0.693829216	9.185143208	92.47067528	466438255	4.710813946	41.80712485	4.59571793	255.6132413	26.22270961	47.5699559	42.9077641	-36.5484609	292.1617022	17.77273066	349.20573	0.859887777	1865753020	0.045767354	1139.767593	351.3378022	17.79609348	98756.26426	1523.418573	156.5067794	17.97325867	0.792910549	3.108434668	3.104048111	7.739462367	0.004286895	8.437002306	-0.198861078	0.900284166	0.287981285	0.995156827	0.373756375	0.95256641	0.295879855	0.010496505
Y090	Y	1	0.922920825	111.0594736	116.8417734	8846	102.499101	372.3330445	0.042090554	8848	0.895461293	25.32183265	109.2296139	292201134.8	4.664871742	40.64334786	3.943017222	199.3149198	25.91079959	61.9069772	56.40932364	-7.819556942	207.1344768	17.20040048	363.4531087	0.908480244	1168804539	0.048142386	1121.502045	241.4862068	14.53549659	83257.86412	1601.708866	142.7760888	21.96223804	0.733152223	3.59509084	3.292234159	8.52096753	0.004129524	8.466034567	-0.163096037	0.865780797	0.246907412	0.988104366	0.337377621	0.924868825	0.262675769	0.012056898
Y091	Y	1	0.701662331	104.6954929	110.941426	5762	73.46088362	339.0782105	0.058847312	5764	0.793581759	58.26303126	148.0380179	236841811.3	4.808002231	46.67676071	4.393658256	301.8426936	27.69116867	103.8598993	104.2612921	17.60954039	284.2331532	19.20189711	405.4125574	0.507044615	947367245.3	0.041644975	1256.523409	366.6288193	18.14219036	127323.6865	1086.934038	174.5143871	24.5643565	0.752888865	3.734163569	3.352915505	10.06435542	0.003324629	8.64071606	-0.197803755	0.912703259	0.244689681	0.99294308	0.335169108	0.941934564	0.252470762	0.008688322
Y092	Y	1	0.61100932	190.0025813	212.659352	16090	116.093348	615.2447327	0.038237709	16092	0.730861441	-27.08610163	65.81366359	401838145.9	4.771732225	44.76285039	3.845571625	174.187638	28.29027772	13.95619357	7.135666309	-61.18201642	235.3696545	18.92962737	316.0461938	0.929660809	1607352584	0.044129613	1316.705114	301.3434047	16.0752904	134825.9202	2419.330673	186.2180947	14.5157084	0.854745764	2.901894271	3.004047988	5.612161514	0.004276625	8.423788883	-0.22367437	0.92389916	0.297736621	0.993846089	0.383315373	0.945089205	0.299855702	0.011613239
Y093	Y	1	0.677676313	306.899764	302.9785471	49562	207.9787005	894.3574311	0.018045225	49564	0.882405535	55.73439644	123.3836608	1924670094	4.538385441	35.24956099	56.86572809	587.1975727	24.29429784	91.62891836	87.80566136	-1.039213794	588.2367865	14.70221284	394.1168206	5.825399361	7698680378	0.053269084	1954.858615	443.2006857	19.80773059	3562795.544	23000.4416	257.4192982	54.00136605	0.6531301	3.831536115	3.294020555	38.75542402	0.00430136	8.435377397	-0.138785906	0.817588311	0.263253714	0.996839533	0.352222913	0.97062552	0.267727494	0.009806791
Y097	Y	1	0.538191777	382.2625079	385.7097354	60686	205.7305385	1065.15137	0.017551847	60688	0.819856526	15.33883475	109.9602729	1989790698	4.920865237	48.95808953	6.387973069	443.6714485	29.86202327	60.04578601	55.5975758	-39.68547492	483.3569234	20.25486383	362.144823	1.036709459	7959162794	0.039517783	1515.904796	462.5314445	20.380509	278773.4185	3052.208161	210.9548143	22.29764021	0.807945502	3.504847196	3.282193211	9.492225395	0.003029008	8.906179822	-0.180941218	0.895256065	0.259340936	0.997666439	0.348833411	0.966027689	0.264289851	0.006946537
[truncated: 417 more columns]
