# Supplementary material for: Predicting central lymph node metastasis in patients with papillary thyroid carcinoma based on ultrasound radiomic and morphological features analysis
Source: BMC Med Imaging. 2023 Aug 24;23:111. doi: 10.1186/s12880-023-01085-4 (PMC10463837; doi:10.1186/s12880-023-01085-4)
Supplement: Supplementary file 3 — Supplementary Material 3 [file 12880_2023_1085_MOESM3_ESM.csv]

id	Grade	group	original_shape2D_Elongation	original_shape2D_MajorAxisLength	original_shape2D_MaximumDiameter	original_shape2D_MeshSurface	original_shape2D_MinorAxisLength	original_shape2D_Perimeter	original_shape2D_PerimeterSurfaceRatio	original_shape2D_PixelSurface	original_shape2D_Sphericity	original_firstorder_10Percentile	original_firstorder_90Percentile	original_firstorder_Energy	original_firstorder_Entropy	original_firstorder_InterquartileRange	original_firstorder_Kurtosis	original_firstorder_Maximum	original_firstorder_MeanAbsoluteDeviation	original_firstorder_Mean	original_firstorder_Median	original_firstorder_Minimum	original_firstorder_Range	original_firstorder_RobustMeanAbsoluteDeviation	original_firstorder_RootMeanSquared	original_firstorder_Skewness	original_firstorder_TotalEnergy	original_firstorder_Uniformity	original_firstorder_Variance	original_glcm_Autocorrelation	original_glcm_JointAverage	original_glcm_ClusterProminence	original_glcm_ClusterShade	original_glcm_ClusterTendency	original_glcm_Contrast	original_glcm_Correlation	original_glcm_DifferenceAverage	original_glcm_DifferenceEntropy	original_glcm_DifferenceVariance	original_glcm_JointEnergy	original_glcm_JointEntropy	original_glcm_Imc1	original_glcm_Imc2	original_glcm_Idm	original_glcm_Idmn	original_glcm_Id	original_glcm_Idn	original_glcm_InverseVariance	original_glcm_MaximumProbability
C002	C	1	0.821258072	75.5006212	81.58431222	3502	62.00549463	242.9949494	0.069387478	3504	0.863307981	-24.04059227	152.4346409	113071115.3	5.530144958	78.08811048	7.31694838	472.3358748	56.00584315	50.80679433	31.80535543	-44.54314868	516.8790235	33.84002915	359.2723419	1.809734859	452284461.3	0.027134026	6011.20872	593.0317605	19.52313024	5685835.883	49205.65506	919.6822364	72.16835094	0.85495842	5.82755587	3.953445706	36.36151571	0.002137476	9.233195186	-0.330314384	0.985918988	0.191294498	0.993707635	0.279866652	0.949556048	0.186504789	0.007197082
C003	C	1	0.71229312	68.18355796	74.21590126	2514	48.56667923	202.509668	0.080552772	2516	0.877691327	102.4319858	223.9987325	130831679.2	5.053763045	55.76936147	7.558954161	415.3481703	40.11480966	152.5368929	139.3904481	61.39585699	353.9523133	23.26419443	456.0696109	1.916462602	523326716.9	0.039053081	3209.85055	473.4770237	18.9091714	1846457.219	21596.34709	494.8817652	31.22896067	0.881233482	3.979006973	3.461865675	14.70818985	0.004076757	8.419943614	-0.331171251	0.980491543	0.251360002	0.994180413	0.339282815	0.949933265	0.25001758	0.016020114
C004	C	1	0.589716614	175.4273812	207.4801195	13534	103.4524413	537.7888886	0.039736138	13536	0.766842533	66.41370568	183.9141029	625775924	5.187484337	55.9665544	4.098602217	362.6551527	35.46208401	127.5296958	125.6301529	6.357341405	356.2978113	23.67943157	430.025538	0.518146173	2503103696	0.033051692	2140.322597	689.6606274	24.91250836	382526.2975	2600.28221	309.7465115	33.63940445	0.804283957	4.111597889	3.445485254	14.97088789	0.002568117	9.200542356	-0.226370667	0.930310032	0.250667625	0.993783687	0.336451507	0.948447094	0.256335161	0.00812202
C006	C	1	0.682091806	251.0716128	259.5380512	32966	171.25389	720.783838	0.021864462	32968	0.892962085	-17.74778062	128.0813875	1042913191	5.458983006	74.54505253	3.649677812	352.2118394	45.08602634	51.14776298	44.07312933	-55.83981349	408.0516529	31.52956653	355.7195836	0.730895168	4171652766	0.026226987	3231.670712	627.0579211	22.58161773	821745.4039	7350.238435	488.4920812	19.98030177	0.921381325	3.145941902	3.148355065	9.562411116	0.002382777	9.251783978	-0.30157522	0.977442068	0.294105902	0.997169763	0.378558378	0.964679413	0.298571312	0.00633011
C007	C	1	0.778308649	104.7720304	112.0178557	5806	81.54497737	386.1909089	0.06651583	5808	0.699425403	73.52297858	287.2666818	311701901.5	5.783801934	98.08034986	3.176874588	421.8903014	63.28217498	156.4493387	135.0841033	15.96379061	405.9265108	43.29872533	463.3257289	0.91402132	1246807606	0.02237628	6324.732237	1060.609798	28.95252336	2765916.118	25837.45006	956.7368363	67.31307778	0.86858198	5.789770365	3.958047968	31.34694442	0.001648723	9.731138601	-0.317910384	0.985535422	0.192419489	0.99050331	0.281205144	0.937725718	0.189507485	0.006226257
C008	C	1	0.562092244	285.8105224	275.2308122	35658	160.6518779	760.4995667	0.0213276	35660	0.880206257	54.60210249	151.4704458	1448167144	4.941760928	53.91276037	4.524488216	365.2276162	31.4056114	101.1213845	96.54168787	9.252217463	355.9753987	22.33866621	403.0404836	0.769195035	5792668577	0.037859387	1543.266331	438.5720978	19.6620557	216887.852	2383.887292	224.8193143	16.92271956	0.859457282	3.064734808	3.083798283	6.995271366	0.003392404	8.726845788	-0.229429286	0.934085838	0.287986301	0.99687797	0.374176704	0.96088455	0.295449195	0.009847617
C011	C	1	0.794620574	156.0027203	168.5823241	15022	123.9629712	472.7350647	0.031469516	15024	0.919075087	14.66631318	154.9055539	578455450	5.505711678	83.69221369	7.720729114	486.7345679	48.80923244	87.09670961	77.76625722	-42.65027807	529.384846	33.84709557	392.4390058	1.460969101	2313821800	0.025769489	4164.510692	878.2641986	26.86370206	3097979.052	23507.97828	649.7827163	23.36010967	0.930625144	3.269347694	3.188138695	12.02177076	0.00240901	9.179011007	-0.33345438	0.984899601	0.292605482	0.99800391	0.376451205	0.97127377	0.299813026	0.006467176
C015	C	1	0.913143283	147.2719504	156.4864211	14714	134.4803924	497.1025971	0.033784328	14716	0.865016269	21.60940433	116.407385	511358497.3	4.95927741	43.66253447	4.827184874	311.9215597	29.32823354	70.74389829	70.93520836	-48.35719159	360.2787512	18.82781684	372.8188346	0.273754691	2045433989	0.040290162	1542.845344	655.1340805	24.62597233	232797.3471	452.484032	220.6161406	25.83427776	0.790111828	3.734672056	3.332640085	10.71161659	0.003273817	8.880040439	-0.208122143	0.912122791	0.259365707	0.99526622	0.34625965	0.953123013	0.262504838	0.009533235
C017	C	1	0.812326184	173.3740757	181.0414317	18390	140.8363013	583.1614716	0.031710792	18392	0.824341138	-54.29202914	92.20392551	470472109.2	4.81331539	100.7239913	2.605494562	287.9169039	48.67587523	14.67378304	15.5120043	-57.69741346	345.6143174	39.07219048	319.8765901	0.471837857	1881888437	0.070038489	3301.44316	353.2281671	15.33197441	603699.9195	4703.995634	492.2709299	19.64152803	0.923116222	2.87973768	3.131006901	10.82212823	0.044747369	7.962955948	-0.339548526	0.97747414	0.416505688	0.996100572	0.484310236	0.962381073	0.222443811	0.207580131
C020	C	1	0.360992972	288.7213846	304.6374895	21838	104.2263906	730.27417	0.033440524	21840	0.717340619	-39.6120459	60.81259684	506852434.1	4.425677229	59.92612676	7.717837948	318.956109	36.16561297	0.857422982	-14.13651496	-45.17830205	364.134411	24.96086258	304.6803508	1.864596832	2027409736	0.090096473	2314.927176	185.2698412	10.52876083	826597.1538	11169.8639	331.0994503	33.46481312	0.816004432	3.515249471	3.375391549	20.25187416	0.036364029	7.737367101	-0.237276095	0.924208096	0.384701915	0.994233687	0.451223772	0.957582739	0.249370568	0.17893593
C021	C	1	0.765725959	174.1629723	184.0543398	17966	133.361109	532.6173157	0.029645849	17968	0.892103716	61.94045151	164.8289819	769704958.1	5.001270406	50.38459725	5.475815178	371.2725821	32.15327545	111.7620398	107.329872	20.66059683	350.6119853	21.39654994	413.9446446	1.089347641	3078819832	0.037493389	1802.19134	417.213288	18.83830984	381168.9302	4669.332747	269.9901228	20.66625325	0.85786986	3.254533253	3.193416908	9.45348058	0.003403023	8.792489327	-0.242910404	0.945182017	0.288912574	0.996003825	0.373181229	0.957781541	0.294120347	0.009090512
C023	C	1	0.698736092	360.012584	365.6665147	70240	251.5537859	1055.293506	0.01502411	70244	0.890274467	59.9786742	165.8642192	3008862875	5.092668273	54.9738122	3.210030179	367.3247736	33.238552	111.8228112	110.3872434	-25.00916528	392.3339389	23.19815412	413.9296883	-0.021198802	12035451501	0.034417968	1739.759041	894.4455527	28.87035978	213629.4891	-298.7203006	259.8975242	16.10901235	0.883244424	3.043147973	3.07328543	6.378528113	0.002916942	8.945828807	-0.240925945	0.946629994	0.285682526	0.997511824	0.372537687	0.964268982	0.293871781	0.007826398
C024	C	1	0.759483879	164.0611533	167.0568765	15906	124.6018011	489.7888886	0.030792713	15908	0.91280181	-49.94990989	65.42802409	381731804.1	5.040072967	59.68429348	8.021934002	355.4419732	37.62236215	5.599266635	-3.997213645	-66.04742721	421.4894004	24.90032107	309.8142411	1.703012322	1526927216	0.03742648	2593.952227	319.0795028	15.27591194	1058079.605	11791.87361	367.0181257	24.14290159	0.875791243	3.236352602	3.242817901	13.13250848	0.005357465	8.625526002	-0.273942763	0.961712946	0.324685809	0.996844595	0.402773994	0.965217005	0.289641568	0.045324927
C025	C	1	0.654832391	120.3209401	124.7878199	7350	78.7900489	340.0487732	0.046265139	7352	0.893732167	51.62841757	170.6719896	301367619.1	5.062147587	46.61952435	8.018902636	384.0106704	38.18565792	101.1637503	87.30737785	3.497427662	380.5132427	21.18254409	404.9258849	1.992992677	1205470476	0.040849033	3032.617743	522.9439039	20.57246371	1611580.811	19102.65858	441.8041206	42.94270903	0.823086593	4.42938767	3.615651545	22.3503287	0.003553172	8.862602963	-0.243366853	0.950538651	0.240509795	0.993137342	0.328549989	0.948530533	0.239282369	0.012502187
C026	C	1	0.639458913	315.0241328	334.3112322	49170	201.4449896	894.5239533	0.018192474	49172	0.878745394	53.46310897	140.4081067	1954272822	4.833702423	42.71521641	4.802880759	302.5095539	27.09641026	97.11344964	95.10555609	-15.58306892	318.0926229	17.85527657	398.7159924	0.527305688	7817091290	0.043041554	1275.350674	612.9241995	23.8921869	160924.2969	1184.092441	185.1748419	16.82511198	0.83329837	3.018964844	3.070808291	7.159852374	0.003910883	8.604509408	-0.216087458	0.919567459	0.295417111	0.996111614	0.380645376	0.957095416	0.297065078	0.011349702
C027	C	1	0.707306566	142.8510663	144.4714505	11222	101.0394971	412.3330445	0.036743276	11224	0.910734783	41.62395109	150.1668667	442020994.4	5.09828378	59.18861076	3.818345824	303.2345258	34.48535215	94.5071317	92.88876824	-2.467266365	305.7017922	24.37097696	396.8968163	0.612768006	1768083977	0.033749846	1891.20585	477.0382769	20.29354052	282580.6867	2672.321326	281.6650382	20.82624073	0.862451677	3.34845167	3.2029644	8.978499471	0.002890108	8.899519115	-0.253858737	0.954365903	0.272255075	0.994759047	0.360185344	0.950715027	0.275371537	0.008046772
C029	C	1	0.571522002	264.9234383	302.1522795	27774	151.4095738	823.1269837	0.029636602	27776	0.717723735	31.60609836	131.5982041	1010277906	5.018493016	49.54186285	6.989678548	401.0074456	32.00110528	79.00050508	74.71234731	-18.03448367	419.0419293	20.95161004	381.4306355	1.219792129	4041111623	0.03784344	1847.946874	472.8915224	20.19313887	547465.7891	5683.074372	276.8699395	16.36278161	0.88825196	2.909009571	3.037339255	7.442561183	0.003683912	8.703539354	-0.262662761	0.955771445	0.306956572	0.997770248	0.390094352	0.967833136	0.313450731	0.008598512
C031	C	1	0.746671453	77.90823018	79.32212806	3510	58.17185147	232.1665222	0.066144308	3512	0.904604814	25.63549566	153.868558	135503400.8	5.330567575	65.85979175	6.317771035	389.6052787	41.8892519	88.77323716	84.5168966	-26.31891198	415.9241906	27.57178677	392.8509788	1.267238751	542013603.1	0.029841066	3187.261615	667.7333346	24.21240564	1146272.012	11500.84022	418.5037876	92.53439208	0.637430702	6.703548398	4.130442356	45.41657959	0.002003496	9.309765444	-0.250683914	0.962760508	0.159821091	0.988032977	0.249425454	0.930662965	0.166105272	0.007029173
C033	C	1	0.818325019	216.717437	223.0336298	29718	177.3453007	708.783838	0.023850321	29720	0.862185898	-15.88799585	55.39985887	762548154.8	4.506047142	36.18628744	3.226970048	134.6466247	22.17107452	19.12507618	17.91622052	-53.67795514	188.3245799	15.29089009	320.3606974	0.431494126	3050192619	0.051545787	790.1621741	259.9977079	15.24338351	43237.65505	508.1579232	117.4988221	6.95244555	0.888000314	1.992518542	2.519372291	2.717269096	0.006732939	7.739722145	-0.27845333	0.94672441	0.391812567	0.995268976	0.462746349	0.951869331	0.379729532	0.015259061
C035	C	1	0.618731424	135.9650843	150.7846146	8302	84.12587015	415.646753	0.050065858	8304	0.777091045	-10.99671494	170.2585689	299463384.2	5.752857838	94.12872678	3.666397293	367.2216703	57.10494211	72.72503952	62.55089196	-54.54409089	421.7657612	38.89263008	379.802824	0.845891964	1197853537	0.021702752	5326.230002	875.8747313	26.29841126	2215950.572	17544.2305	798.1248188	61.064628	0.857917176	5.571552252	3.928695464	28.36428583	0.00141826	9.90509134	-0.279960382	0.977376887	0.193179485	0.991915487	0.282368337	0.941595919	0.19890134	0.004802372
C036	C	1	0.696833306	118.1800676	116.3615057	7430	82.35180726	343.764502	0.046267093	7432	0.888870127	10.83647998	91.95337985	227682638.4	4.638153812	41.32601645	3.993368689	220.9033716	24.92234137	48.64076212	45.19446762	-35.67068025	256.5740519	17.42788055	350.0596892	0.620978698	910730553.5	0.046665802	991.4049816	358.7610169	18.11735656	68055.64745	910.5527103	139.4227617	17.33569492	0.778717311	2.977697271	3.042283209	8.004991402	0.004556254	8.240540865	-0.219314534	0.919765844	0.297170582	0.994112036	0.382113349	0.949082949	0.308659316	0.011410444
C037	C	1	0.762427892	118.1048856	123.5475617	7570	90.04645903	473.5046174	0.062550148	7572	0.651371351	-57.22466769	42.72547795	163650294.6	4.667620605	60.34823571	6.019280532	229.8148383	33.2981262	-9.158950587	-15.79832356	-61.59311642	291.4079547	23.63345176	294.0242079	1.352974484	654601178.2	0.053371766	1861.718818	180.986933	11.16703299	349094.2891	4933.636632	247.0605639	21.98221964	0.834795419	3.205809633	3.246268022	11.02733113	0.014695381	8.003926541	-0.259382941	0.943318851	0.34300729	0.99392054	0.419502937	0.95108055	0.258003245	0.104540984
C038	C	1	0.738710076	114.8610299	132.8006024	7202	84.8490001	358.3086579	0.049751272	7204	0.839603399	33.14915413	101.3886542	245238186.5	4.437139211	36.5080075	6.35252023	253.3602942	21.48708593	67.94933142	66.86516904	2.302228229	251.058066	14.74974087	369.009198	0.827549372	980952746.2	0.053770177	781.0777045	219.0790252	13.97367802	77260.99565	989.1478054	109.5444642	14.28733454	0.769279288	2.727576847	2.95401562	6.441385542	0.005650493	7.940409498	-0.206046725	0.898983327	0.325368617	0.994700012	0.406221191	0.951283122	0.318683239	0.015823489
C040	C	1	0.908224585	164.5615196	179.1200715	18914	149.4588178	555.7300141	0.02938194	18916	0.877268977	11.4802735	192.064682	748608792.5	5.720191018	103.2335022	2.672989635	338.1556794	57.18699552	91.81070735	79.39839639	-42.82415518	380.9798346	42.05139237	397.8714758	0.56604641	2994435170	0.021664958	4786.080858	950.8550919	27.80621004	1385058.827	10736.73227	738.7926554	28.11443692	0.926625957	3.820477592	3.403644629	12.67356983	0.001708043	9.723813372	-0.29993106	0.980437319	0.252697881	0.995388251	0.341254986	0.95454266	0.256917724	0.005667198
C044	C	1	0.596138342	287.174606	307.1677066	36750	171.1957934	864.3818177	0.023520594	36752	0.786190842	-0.834552864	172.1218474	1336382870	5.682579765	87.73912718	5.420035198	543.3345353	54.99372546	74.61937666	60.91024214	-42.86255111	586.1970864	37.09111041	381.3774027	1.245717921	5345531479	0.023480756	5109.045935	766.3184185	24.39579242	2850332.261	24411.38831	745.9398164	61.28676903	0.847629774	5.48849764	3.876652364	28.83613545	0.001365951	10.14280655	-0.213074941	0.940394024	0.195712646	0.995735643	0.284916865	0.957328586	0.200662645	0.004009605
C046	C	1	0.832497688	184.2791917	198.7259419	21438	153.412001	577.1025971	0.02691961	21440	0.899381679	-43.63267468	62.9109283	486602843.6	4.194415024	69.73737673	5.553282229	349.4437433	37.4289736	-2.196359848	-14.05333377	-47.98320859	397.4269519	28.87878529	301.3040202	1.268814539	1946411374	0.127690326	2097.104528	170.2613081	9.969907948	485187.67	6584.982715	303.8442547	20.40106978	0.874011505	2.80338214	3.075376913	12.07113975	0.08140222	7.163874477	-0.282711408	0.945232989	0.456689361	0.996899918	0.519297226	0.967769688	0.19633553	0.281422517
C048	C	1	0.597394547	183.9810435	180.9419797	15130	109.9092721	544.8183259	0.036009142	15132	0.80033662	0.697777057	128.1346084	525404145.9	5.335249017	61.72575775	3.438832197	256.2956111	39.41054041	69.13892052	73.08646799	-64.69939507	320.9950061	26.23618684	372.6735557	0.148251413	2101616583	0.030593828	2622.036492	836.8671428	27.2538377	524259.5753	747.9529336	394.7731518	18.40621629	0.91078248	3.19798031	3.162487736	7.732442988	0.002745087	9.089683478	-0.291085167	0.973690233	0.279823992	0.995735064	0.366871144	0.954677124	0.285632058	0.008687749
C050	C	1	0.612630504	218.691836	226.0619384	22558	133.9772896	624.7005769	0.027693083	22560	0.85228201	-17.34434332	185.265256	888323687	5.876991631	112.9886316	2.730752474	364.0253084	63.57570825	89.20517095	95.43130321	-55.01119341	419.0365018	46.69216182	396.8679879	0.184475573	3553294748	0.019047897	6023.534735	1129.805916	30.18133387	2214538.251	3402.868584	920.5136437	44.95022436	0.906868085	4.733250125	3.684883345	20.83861236	0.001347809	10.08148385	-0.284314892	0.977197109	0.223725461	0.994013471	0.312343523	0.949652817	0.220295771	0.010123587
C051	C	1	0.734567103	100.9899662	109.2520023	5766	74.18390693	305.137085	0.052920063	5768	0.88215979	6.142773251	124.2677805	199823404.3	5.230396897	56.16412752	10.43805489	417.808266	41.11616178	67.08969032	57.61192789	-34.52624423	452.3345102	23.88663087	372.2550059	2.238725476	799293617.2	0.033710308	3818.948658	536.0346109	20.40235017	3020968.899	27656.28243	524.1562007	45.10289401	0.839734395	4.590264531	3.623564776	22.5574411	0.00267809	9.033350721	-0.257701708	0.958088991	0.228426709	0.994793104	0.317405628	0.954198222	0.230121805	0.009528846
C052	C	1	0.723545747	110.3915603	111.8033989	6866	79.8733439	322.5929291	0.046984114	6868	0.910546203	35.70148201	166.2936196	280798491.5	5.381414845	60.6830668	4.765789666	374.43284	40.63528793	100.7498518	96.18466047	-43.73901297	418.1718529	26.08817626	404.4010156	0.700540733	1123193966	0.029749102	2939.737719	962.2164657	29.45276063	846851.3209	5852.663607	426.4034732	47.40724611	0.799935963	4.854810321	3.730709703	22.16107504	0.002257783	9.368852559	-0.259529751	0.962747475	0.226611903	0.993518449	0.313056121	0.947969596	0.227242604	0.008646304
C053	C	1	0.77063911	237.9989979	286.1957372	31526	183.411336	830.4062043	0.02634036	31528	0.757964355	-46.23929249	97.38101927	847500887.6	5.188895695	78.31560652	7.578679653	473.5471702	47.28686569	21.73170554	10.20176993	-52.6677261	526.2148963	32.07693771	327.9078892	1.653801035	3390003550	0.038574654	4012.293457	377.127697	15.68126484	2398924.672	22390.44404	582.6671352	57.76710568	0.819684653	4.996700711	3.820768449	31.10338475	0.007298334	9.240427833	-0.214271229	0.931759506	0.260129582	0.99509895	0.340523645	0.957233692	0.21328218	0.069595881
C054	C	1	0.62364563	499.0333547	498.6581996	121138	311.2199707	1369.401154	0.011304472	121140	0.90097853	19.53110605	215.6245843	5521204943	5.809956261	136.9414316	2.074630183	420.4741501	67.01209808	120.0112318	119.6285691	-50.93019498	471.4043451	53.99528772	426.9756861	0.132234674	22084819773	0.019635902	5898.801727	1482.042885	35.46880359	1659474.57	2775.376663	918.2650421	22.24023752	0.952679809	3.455495819	3.256960603	9.556678654	0.001550031	9.821978059	-0.307795889	0.982213446	0.269392032	0.997619637	0.356913362	0.966204304	0.27223433	0.004641746
C055	C	1	0.6537601	167.2762215	202.4055335	13834	109.3585193	536.4163056	0.038775214	13836	0.777278843	-41.68118404	66.73643357	345830809.8	4.935051492	57.72936884	8.153306305	310.1562997	35.17757033	12.60748805	5.87272434	-50.5983314	360.7546311	23.88473801	316.196137	1.633548527	1383323239	0.040138387	2256.555476	258.6581682	13.87772199	880229.1274	9730.998255	309.8156393	45.55204152	0.743698099	4.946913902	3.79488644	20.31850139	0.003621015	9.047374106	-0.159027266	0.879343507	0.217879487	0.992037694	0.305711456	0.94023019	0.198492295	0.034695153
C058	C	1	0.79165303	150.4379171	153.9350512	13918	119.094633	456.0487732	0.032766832	13920	0.91702686	40.4168072	187.947926	573662018.6	5.347120236	78.72852301	2.967869433	314.8961464	46.21189403	102.0866397	87.95453669	-27.25355839	342.1497048	33.84496961	406.0115856	0.757903913	2294648074	0.029014236	3171.74185	846.8103346	26.98621424	682853.9751	8046.780287	490.9151642	16.71485227	0.93413497	3.001958517	3.076322578	7.131660187	0.002907313	9.007523328	-0.315319851	0.97906699	0.303211316	0.996550167	0.386116121	0.959647831	0.304933155	0.008756211
C061	C	1	0.856672788	111.5658572	116.498927	8044	95.57543396	372.5340546	0.046312041	8048	0.85344391	17.9758597	221.5135189	355432765.5	5.924833306	92.7169507	7.531779955	628.7865189	67.20247191	109.766272	90.22607826	-45.34550503	674.1320239	40.9312364	420.3051797	1.762502127	1421731062	0.021074349	8748.0464	1296.00544	32.40335028	10753665.38	72802.69366	1206.989761	222.8794315	0.68866854	9.913174553	4.641866941	114.5383558	0.001055799	10.34897766	-0.255237619	0.971203145	0.128660594	0.988903007	0.211226913	0.936746934	0.133975046	0.004047085
C063	C	1	0.669636473	136.1580833	134.8332303	9470	91.17641871	396.0487732	0.041821412	9472	0.871026261	40.75561171	144.0595336	361755959	4.970106609	55.7922995	3.102233856	236.0397728	32.32978246	88.7873575	83.13750224	3.615804228	232.4239685	22.97812102	390.8561932	0.617052733	1447023836	0.036643564	1612.954435	383.1423298	18.09594197	170872.7178	2201.785471	238.975492	16.26158956	0.872377808	2.978090426	3.074042816	6.959926556	0.003626027	8.610944088	-0.263432831	0.956545513	0.299731788	0.993174076	0.3844419	0.944054853	0.298990385	0.01071506
C065	C	1	0.559857734	250.3795159	263.2869157	25776	140.1769084	722.0731599	0.028013391	25780	0.788191036	-41.88843733	135.9855093	782310792.3	5.414555941	92.62584878	7.252042672	572.1709108	57.89266303	39.49641949	23.72490096	-50.52493735	622.6958482	38.45728773	348.400043	1.692105109	3129243169	0.036720932	6124.771124	557.6938849	19.27211176	5509064.162	42900.77459	860.8853542	115.7734886	0.76276096	7.375224701	4.37385408	59.27653538	0.00925407	9.807836154	-0.185150007	0.923586668	0.217719937	0.993036798	0.293766541	0.947642858	0.142859424	0.089562016
C067	C	1	0.678935186	120.0448576	131.8483978	7242	81.50267778	406.8772004	0.056182988	7244	0.741431166	19.83537218	106.1900862	237858775.2	4.765330674	39.40582619	11.14702029	353.1013517	28.42519426	60.04251417	52.84949955	-11.43958563	364.5409374	16.94798072	362.4101596	2.131819878	951435100.6	0.04679148	1710.511769	294.8602622	15.33213611	730233.9688	8995.36374	258.3874806	19.25503947	0.861440834	3.029179375	3.10820384	9.621463589	0.004982192	8.256078836	-0.261432026	0.950954847	0.31089397	0.996595116	0.393140345	0.962147729	0.30196385	0.014653318
C070	C	1	0.627279907	105.2392056	116.2755348	5166	66.01443909	318.5929291	0.061671105	5168	0.79973481	31.57555353	125.896879	185940059.1	4.904857128	51.0490099	4.403292598	248.2786765	30.83267245	77.24690584	72.29906359	0.544419893	247.7342566	20.80188996	379.3632222	0.929033384	743760236.3	0.039419768	1601.226418	291.9862904	15.69466974	193747.08	2689.78148	210.4305186	27.7927476	0.766026659	3.977998119	3.44516839	11.17804299	0.003210321	8.713712448	-0.209892068	0.922669833	0.241417326	0.989360843	0.330780175	0.929827691	0.237723815	0.009589988
C071	C	1	0.559741295	193.6597147	212.1508897	12986	108.3993394	614.156421	0.047293733	12988	0.657754207	71.3655753	170.2411277	576812806.9	4.927479508	56.78681411	4.208087887	343.6143897	31.7825509	119.6486522	116.2198529	27.90346785	315.7109219	23.22167677	421.4793512	0.660184198	2307251228	0.03700509	1539.85222	423.6551237	19.24509122	206636.7306	2230.863595	228.9244916	15.80740512	0.87081101	2.943774778	3.029095796	6.637589513	0.003495573	8.578206997	-0.256252718	0.950563338	0.298002179	0.996227222	0.383575731	0.95744367	0.29770802	0.008511647
C072	C	1	0.448460603	295.2593571	300.4263637	30286	132.4121894	752.2985566	0.024839812	30288	0.820041181	-11.318336	177.6996105	1128374992	5.861891848	106.7489296	3.637755593	486.6869632	61.04201695	78.49103717	69.50011638	-62.05807665	548.7450398	43.78335184	386.0303259	0.715400896	4513499967	0.0196584	5763.947315	1049.300535	29.18484091	2490456.626	16236.35232	856.4065599	66.22768308	0.856401125	5.889766588	3.978317826	29.18826431	0.001041769	10.40937848	-0.224221196	0.953879456	0.178994281	0.994790118	0.268744631	0.951622405	0.181031251	0.003290231
C073	C	1	0.649597563	189.1247086	185.9462288	17450	122.8549498	552.3330445	0.031652323	17452	0.847816025	-13.91562419	84.7708967	489969844.4	4.956211088	47.51577081	5.862752114	246.5187182	31.49793315	32.34201618	26.79470071	-56.07180695	302.5905252	19.87609182	335.1136125	1.342087104	1959879378	0.040519981	1849.917537	423.9126916	18.97892811	443213.3476	6278.899454	277.0405527	22.19091759	0.851909186	3.400244188	3.220264933	9.745200547	0.003575183	8.774447847	-0.230843014	0.933578034	0.277654483	0.994429081	0.364074811	0.95015458	0.274711083	0.011188801
C074	C	1	0.825879676	188.7485903	193.7937047	22882	155.8836246	577.019336	0.025217172	22884	0.929312023	50.44912269	161.8427316	950841210.7	5.251705333	49.80810444	6.463548409	420.087033	36.10073436	104.4597037	101.5962032	-50.17802739	470.2650604	21.48737314	407.6787027	0.893118763	3803364843	0.035063996	2614.272665	1137.987743	32.40955769	937422.8323	6345.843956	384.3654154	33.93873677	0.837773759	4.079037485	3.518325609	16.63001362	0.002687036	9.325078668	-0.222977404	0.944345959	0.245452429	0.996418224	0.333755379	0.960752829	0.251048736	0.008475063
C075	C	1	0.756787808	284.1993479	290.5236651	47062	215.0786014	852.9848481	0.018124705	47064	0.901568657	-0.093726784	208.4160921	1949068176	6.02247962	113.1061683	5.951005992	666.9576671	69.51843923	96.71766381	81.66297365	-52.83295436	719.7906215	47.13615414	407.0043896	1.287652739	7796272705	0.018502882	8267.668415	1243.794872	30.73343345	9343152.971	57063.97569	1258.222354	61.22274766	0.907149816	5.758168555	3.992847862	27.10927872	0.000994227	10.58647961	-0.241233464	0.969471165	0.179439784	0.99713549	0.269423958	0.962920895	0.18074853	0.006953432
C076	C	1	0.712306455	108.7272019	106.9205312	6558	77.44708769	314.3086579	0.047927517	6560	0.913343819	1.479914145	113.1330619	210995660.7	5.113140621	55.18187608	5.559766369	329.8640972	35.62754401	55.45630177	48.67642046	-38.02855479	367.892652	22.97742339	358.6863402	1.252649443	843982642.7	0.035416419	2306.70819	435.9754195	19.21537574	466550.4562	6015.641993	300.5385154	33.57965456	0.797383901	4.288414773	3.540098295	14.02689084	0.002769796	8.972435341	-0.228956354	0.939971211	0.231382239	0.994040047	0.319972478	0.947401725	0.23651935	0.008120656
D002	D	0	0.764862352	143.4544667	148.4318025	11006	109.7229208	454.1909089	0.041267573	11008	0.818806439	54.62639743	149.1546283	441301935.6	4.920398026	46.30615428	7.754260693	346.6644173	31.70880359	98.01734047	89.17932455	-0.819509472	347.4839268	19.54500114	400.4457616	1.709888998	1765207742	0.042226161	1939.004676	510.9479725	21.10020228	627756.6519	8425.33887	287.6341547	24.72032454	0.841902148	3.502832404	3.281133634	11.73308898	0.003845005	8.674052466	-0.237101892	0.940889362	0.272149321	0.995272977	0.358666113	0.954910608	0.279648366	0.01104581
D004	D	0	0.607878441	94.00007396	100	4018	57.1406184	271.764502	0.06763676	4020	0.826831797	-31.76620648	56.76340133	101156661.9	4.726930376	41.96817672	4.393402315	158.0452089	27.95663838	15.06790372	12.2231039	-48.32052522	206.3657342	17.87730183	317.2591921	0.877773924	404626647.7	0.044908789	1385.610994	211.216041	13.13052833	147701.5212	2013.085517	179.6145773	24.44818935	0.756615143	3.711756132	3.337084207	9.726504987	0.00457478	8.332359427	-0.220892817	0.922099047	0.26302016	0.986827637	0.349735823	0.92314855	0.251252485	0.027728603
D005	D	0	0.941561353	113.8066553	120	9274	107.1559483	385.6223664	0.041581019	9276	0.88527105	67.92232832	134.7904895	373738179.9	4.397400854	37.37206988	3.36100518	226.9077945	21.16294313	100.5788875	99.37131844	38.82069484	188.0870996	15.0461614	401.4517531	0.511347541	1494952720	0.054406471	700.0649949	206.6188607	13.58704361	31605.58088	483.0561072	100.2474566	12.20463208	0.782990687	2.644682464	2.893875547	4.839326504	0.005715929	7.904894561	-0.201830821	0.893862461	0.320865377	0.99221335	0.40322475	0.939137492	0.32092463	0.013824877
D006	D	0	0.819493076	136.6594566	143.0104891	11934	111.9914784	421.019336	0.035278979	11936	0.919805298	-1.856544791	123.1101062	379468862.2	5.152947559	59.10078426	4.342329031	287.3601376	38.31312675	53.07749525	45.33144747	-31.01848657	318.3786242	25.48509489	356.6060141	1.118274474	1517875449	0.033504428	2504.131609	400.5785816	17.86120601	515277.3291	6980.636123	353.3809142	27.16363364	0.856965524	3.707525378	3.390973409	12.88946124	0.002878166	8.990253492	-0.245730683	0.953981201	0.263525406	0.993826682	0.350297805	0.948468603	0.267778754	0.007649473
D007	D	0	0.724084016	158.1663356	160.224842	14134	114.5257155	461.019336	0.032617754	14136	0.914151833	-51.24185342	59.03278382	329376836.7	5.025888096	62.48981526	4.556465481	244.7294678	34.96638943	2.073441715	0.012373171	-73.09153728	317.8210051	25.15942449	305.290475	0.855660949	1317507347	0.03549143	1953.909913	323.6120129	15.884057	386249.4904	4183.544856	297.554731	12.32119511	0.920399377	2.463171093	2.82808733	5.904110845	0.004261219	8.405928245	-0.324014503	0.976739038	0.353547074	0.997064749	0.429513203	0.964188573	0.34872722	0.012232825
D012	D	0	0.85846535	53.90626632	56.92099788	1922	46.27666179	167.882251	0.087347685	1924	0.925714017	4.877492927	173.2408702	71813496.81	5.518185611	78.54861296	4.980682838	346.0465891	53.53432052	79.85409236	63.85097898	-39.6866443	385.7332334	35.1920801	386.3941112	1.292796098	287253987.2	0.026793626	5011.27769	753.7325294	24.32544809	2406167.026	24485.75458	738.1723232	90.16738287	0.782370763	6.820569808	4.172917527	42.04439179	0.002391061	8.984424155	-0.371658262	0.991607235	0.160463893	0.98630344	0.248351264	0.924494294	0.165505723	0.008872146
D016	D	0	0.549609469	101.2549276	105.7733426	4170	55.65066696	274.9949494	0.065946031	4172	0.832430994	0.495490833	60.50639321	112934283.5	4.174771002	32.38057181	2.785852592	113.1412527	18.77725593	28.24524028	25.0516533	-18.29988125	131.441134	13.42531365	329.0567062	0.535257724	451737134	0.063037241	533.3781573	114.8802187	9.946925993	14493.39392	363.4491587	72.60908798	8.864076502	0.782133423	2.274072785	2.676246739	3.392555313	0.007888247	7.406811422	-0.210660087	0.889740068	0.354374283	0.988335219	0.431782691	0.926047867	0.352817267	0.02047904
D018	D	0	0.899218406	70.73865997	79.84985911	3342	63.60950507	250.0243866	0.074812803	3344	0.819644982	1.359924511	61.56075078	91895498.28	4.272652355	33.80960434	3.476670814	121.8964743	19.57942639	30.62841811	27.01229751	-31.34065537	153.2371297	13.64233046	331.5461428	0.635176635	367581993.1	0.060672833	607.6939745	196.4445047	13.38991474	22349.6985	468.9406367	79.488442	10.88776758	0.75656916	2.524690159	2.815785234	4.187017413	0.007191432	7.566758104	-0.207393205	0.892366209	0.328860324	0.989744012	0.41001569	0.930178358	0.331871783	0.018634112
D025	D	0	0.845226635	84.6437888	87.31551981	4610	71.54318478	266.3086579	0.057767605	4612	0.903795363	41.9121874	113.7609852	167657751.3	4.507190718	31.99141997	4.126943704	194.7776562	21.79629729	80.20389611	81.23471598	0.544773666	194.2328826	13.74119638	381.3266559	0.162520471	670631005.3	0.055563788	855.0158873	297.0651691	16.42454337	60989.93616	44.50601447	122.3673805	13.17113545	0.804855583	2.604828101	2.845052286	5.961726646	0.006482661	7.83464435	-0.253069763	0.936834268	0.328313907	0.991865784	0.408982873	0.940427212	0.33511556	0.01808739
D026	D	0	0.944567439	79.62749956	83.52245207	4554	75.21354334	271.2792206	0.059569438	4556	0.881830095	20.22457833	98.91778631	146094940	4.617255482	39.25961052	5.422664536	210.588549	25.6583591	56.5116366	50.39708071	-11.41075512	221.9993041	16.76659122	358.1423881	1.289443751	584379760.1	0.05021502	1165.423137	233.5953662	14.30167301	107510.7343	2046.10106	139.7724647	23.57960291	0.70728964	3.520149812	3.288295164	10.63504829	0.004859798	8.191907979	-0.19303699	0.895981961	0.265117671	0.989514735	0.352809395	0.932690571	0.275136586	0.013065634
D033	D	0	0.697074056	80.70925698	94.40338977	2918	56.26032913	262.9949494	0.090128495	2920	0.728115318	-16.49492842	81.72508244	79276863.67	4.908625525	40.21952459	5.986467743	219.1310103	32.71792329	26.30291498	15.77466905	-64.12673226	283.2577426	18.36563078	329.5427793	1.491624531	317107454.7	0.045126665	2124.85106	421.1623634	18.57227411	634485.8036	8955.861878	326.1802703	21.2715613	0.877463352	3.293397662	3.160974428	9.71870927	0.00522288	8.191049849	-0.331271866	0.97760922	0.282710316	0.993732149	0.367869388	0.947814536	0.294382774	0.016084928
D034	D	0	0.685972254	105.3702855	113.507709	5494	72.28109227	367.764502	0.066939298	5496	0.714462522	43.89902854	188.623383	240872418.4	5.489468348	63.98756394	3.806190692	339.6648079	44.22263314	114.7198529	109.0712808	-52.62662187	392.2914298	29.01980955	418.6973095	0.435885158	963489673.8	0.027938276	3314.880576	1233.156748	33.84108951	642412.7985	2051.157506	418.5279279	66.86391674	0.723567516	6.268803135	4.056739637	26.37035016	0.001668208	9.651703069	-0.22310913	0.95201012	0.15370584	0.989717374	0.244988872	0.929741081	0.15912584	0.006406242
D036	D	0	0.562311841	242.6651999	237.2003373	25694	136.4535154	645.3036072	0.025114953	25696	0.880555429	26.63893559	221.2030633	1166329359	5.947581615	102.5401909	4.026379511	510.1982763	62.25931805	118.5807936	108.6055246	-52.30709203	562.5053683	42.76237678	426.0963734	0.790474691	4665317437	0.019242374	6348.238656	1426.977202	35.18069769	3100088.254	19693.60454	886.9921654	129.8107223	0.74465317	8.546732953	4.495591463	52.99313197	0.000710832	10.91712205	-0.164523261	0.915045288	0.123163503	0.990426368	0.207900369	0.933492351	0.12876999	0.00229702
D038	D	0	0.797650945	155.4598679	164.4384383	14710	124.0027105	479.8477631	0.032620514	14712	0.895999555	43.76102085	155.894875	584052815.6	5.161135199	53.39608303	3.629025517	278.4041549	34.43527629	95.99533474	94.16159533	-45.76279075	324.1669457	23.07905766	398.4925427	0.241516655	2336211262	0.033832694	1984.001443	949.0890196	29.68255699	298263.9236	876.4779189	293.3476706	21.21304578	0.864946076	3.444011878	3.230414997	8.614787195	0.002800244	9.023826364	-0.249691556	0.952290564	0.26330609	0.995242757	0.351968012	0.952128987	0.271325747	0.008451004
D040	D	0	0.844802675	85.4699032	85.90692638	4830	72.20520285	265.137085	0.054893806	4832	0.929197473	62.46213872	165.6952381	206152081.7	5.054144673	57.71407783	3.038554706	271.344721	33.45629121	110.9888668	107.7664313	6.050394674	265.2943263	23.45888503	413.1049465	0.364246274	824608326.9	0.035024506	1743.848133	503.678415	21.36550933	157041.5865	1330.82684	228.9394416	40.17959526	0.701313813	4.923512194	3.687752991	14.60888925	0.002408667	9.080829935	-0.193338158	0.915892936	0.191122547	0.986816357	0.28401366	0.92039166	0.192032142	0.006899069
D042	D	0	0.682447795	111.8662488	114.1402646	6262	76.34287483	332.6518036	0.053122294	6264	0.843279574	-12.11124187	73.21744242	170344089.1	4.721859972	43.49949739	3.886026224	182.7262398	26.28064449	28.05120765	25.09136661	-49.86895127	232.5951911	17.63288227	329.812913	0.746162956	681376356.6	0.045515415	1158.962719	285.0311799	16.01507243	92660.37476	1538.191607	148.9334294	34.7427146	0.619970955	4.496014946	3.563726951	13.15189361	0.003280508	8.72961979	-0.148277864	0.839045041	0.212346231	0.985091227	0.303276478	0.917332828	0.222973651	0.009962037
D043	D	0	0.49252036	144.7190682	147.6482306	7490	71.27708762	385.9066376	0.051522916	7492	0.794993527	4.224157818	78.26691807	221306114.9	4.569839726	43.35009323	4.142083528	189.8330898	24.91455357	42.30935957	41.67173175	-22.74550052	212.5785904	17.84744598	343.7382158	0.699846396	885224459.8	0.049503596	980.2633469	219.1782833	13.70786855	62670.85015	801.9257708	134.4974563	9.424899281	0.867711836	2.250224018	2.704475453	4.08704677	0.006606552	7.761733154	-0.282530038	0.952960728	0.367829606	0.99503702	0.442806772	0.952150749	0.354600896	0.01869827
D047	D	0	0.737244251	97.73769386	98.79271228	5346	72.05655289	298.3086579	0.055800348	5348	0.868867497	-51.12485676	45.02447282	115198981.2	4.433049758	58.22573609	3.103005735	156.5814982	29.36929684	-8.67229714	-11.58920211	-54.54726461	211.1287628	22.35979598	293.5341371	0.693961444	460795925	0.061554547	1290.459186	126.1864419	9.33668886	94999.49829	1521.721343	175.7905089	19.76514305	0.797207393	3.16583128	3.225963565	9.189715852	0.017776515	7.712987037	-0.235938815	0.924088156	0.346406547	0.989760496	0.421266514	0.935381529	0.258259531	0.110335039
D048	D	0	0.632467937	81.57909628	81.60882305	3022	51.59616268	248.6518036	0.082280544	3024	0.783719311	-30.50504634	86.54415174	84300776.34	4.958942732	57.26017787	8.1196099	341.3109958	36.50019206	30.26605666	24.95191488	-37.10004296	378.4110387	24.38752571	333.9295785	1.515154225	337203105.4	0.038860194	2433.295233	262.7406379	14.03738231	526876.1584	5507.439915	299.7080061	37.04707152	0.774772586	3.887075364	3.427041567	21.40798011	0.00517184	8.362566655	-0.289479328	0.967900002	0.272124606	0.994375707	0.358939701	0.954535819	0.23831544	0.041130107
D050	D	0	0.49559188	120.7988758	136.4990842	5150	59.86694191	352.9360749	0.068531277	5152	0.720796211	4.871972594	133.3502522	176010696.1	5.33851731	65.59088106	7.188708151	399.1029695	41.7316385	65.29388329	57.83293481	-65.46253726	464.5655068	27.01420218	369.6677795	1.378354154	704042784.5	0.030474808	3214.646014	833.114298	27.17653008	1598040.752	14260.03738	440.2778	62.10263129	0.752510831	5.846408918	3.968100626	26.34528073	0.001969595	9.404193008	-0.228984516	0.95069832	0.174379972	0.993194848	0.26487623	0.943885292	0.17842866	0.006839368
D052	D	0	0.852596529	44.11892437	46.5188134	1286	37.61564179	138.7106781	0.107862114	1288	0.916464235	38.39195293	224.2499108	62390198.49	5.680299633	93.8711089	2.849610598	368.0384347	57.32495521	134.3401423	132.3077381	-12.48241569	380.5208504	40.17965873	440.1799409	0.187857352	249560794	0.022626442	5107.021176	1125.851321	31.12002764	1446652.283	1166.557972	725.2608019	95.84425212	0.765832239	7.342275061	4.230721239	39.32548228	0.002581801	8.756917813	-0.457628177	0.99720517	0.14597326	0.984779235	0.232590728	0.917881158	0.15362009	0.007574522
D053	D	0	0.858959614	106.396736	109.2886087	7462	91.39049927	345.4213562	0.04629072	7464	0.88650945	-35.54299562	43.6877174	159979162.6	3.853134952	42.41519857	7.01947456	206.031989	27.88470855	-9.410329123	-27.49149145	-40.84583147	246.8778204	18.78483107	292.8032479	1.82486047	639916650.3	0.125219273	1291.385183	90.18718091	7.297907448	226546.9773	4258.424264	172.0704555	24.38052261	0.749715727	3.104215144	3.216251781	14.2929574	0.03888533	6.810621425	-0.202873874	0.874751487	0.408604314	0.991264849	0.469663502	0.94679294	0.286305601	0.1375091
D061	D	0	0.487018947	135.4405886	137.3171512	6790	65.96213288	358.1076477	0.052740449	6792	0.815692038	-16.78838849	159.7449408	221941426.7	5.555637555	89.38728222	3.500124018	295.9445212	54.8476422	54.97211421	35.41478838	-48.89636638	344.8408876	37.99710412	361.5349969	1.02006068	887765706.8	0.025950991	4702.352131	584.0934681	20.9595478	1457345.126	16949.72679	654.6616179	75.59649137	0.792142663	6.003156907	4.004519358	37.72103814	0.001756751	9.657394007	-0.250120611	0.964565646	0.178828797	0.986111777	0.268752294	0.926332461	0.185770148	0.00612223
D063	D	0	0.548989757	66.72473942	67.67569726	1914	36.63119852	174.509668	0.091175375	1916	0.888702509	-18.26434269	79.43396632	52218532.72	4.840033027	49.78067693	2.807474391	152.1149623	30.22830512	28.06516292	23.4772534	-46.23124015	198.3462025	21.56643449	330.1752958	0.416589953	208874130.9	0.039875175	1388.974809	278.978869	15.66150373	82750.55128	990.6367062	173.0678138	38.3274408	0.638214444	4.817173889	3.650902997	14.2582261	0.003516337	8.47595372	-0.236023854	0.94388433	0.192630475	0.978734639	0.28496128	0.90085187	0.205944366	0.01255355
D065	D	0	0.690456889	86.54803217	87.7268488	3974	59.75768504	259.4802307	0.065294472	3976	0.861220954	-11.57094829	65.65856862	107686970	4.585182097	41.90190665	3.698945296	168.4523751	24.409985	27.70784941	25.25764184	-47.91892556	216.3713007	17.13870906	329.1458522	0.547422591	430747880.2	0.049058941	944.5574262	266.9636063	15.69623184	40260.35501	373.4988447	110.8760528	28.53021352	0.587945979	3.977290143	3.400133416	11.52555204	0.004342406	8.283841672	-0.174110824	0.867221074	0.24236282	0.986196031	0.330734903	0.921676184	0.249045769	0.012521136
D067	D	0	0.652661604	117.0523757	120.0166655	6798	76.39559131	344.9360749	0.050740817	6800	0.847338413	17.13369832	122.964847	231223554.3	4.951925659	51.53975542	3.389240665	226.8771294	31.76326102	66.58555573	61.50557836	-15.38997801	242.2671074	21.97276792	368.8005633	0.679256605	924894217.4	0.037635294	1628.885827	363.315663	17.61673652	170541.1859	2230.872715	229.3734748	17.51627049	0.857295802	3.217760145	3.119825076	6.552312539	0.003437926	8.616751979	-0.249048815	0.946712807	0.273985558	0.993156075	0.362114016	0.941796617	0.278578052	0.010133088
D069	D	0	0.58909036	97.81245995	108.8117641	4334	57.62037723	285.6223664	0.065902715	4336	0.817066063	11.85849293	147.5592491	155122879.7	5.323100446	60.10811679	8.721253609	426.1590457	46.79083326	72.14859553	55.42941757	-45.45227151	471.6113172	26.25246415	378.2886299	2.070556752	620491518.8	0.033181397	4607.710378	760.7160011	25.06543277	3362206.546	32416.15216	646.8811572	117.1342993	0.693767733	7.087155998	4.202932406	63.08722609	0.002247566	9.296217825	-0.259552196	0.965038514	0.173190141	0.988555359	0.260409658	0.936146574	0.165014197	0.009310272
D071	D	0	0.93989156	89.32078507	95.70788891	5330	83.95185201	350.391919	0.065739572	5332	0.738608761	51.94156037	127.3490637	203160200.9	4.633523349	39.57704519	4.284341069	232.5250315	24.33505195	89.11728656	86.15918562	11.47145686	221.0535746	16.40485354	390.3949958	0.691950785	812640803.7	0.048367118	995.9900601	288.1043513	16.11383665	76082.16905	1088.522098	132.7501637	18.96319227	0.748521704	3.366422617	3.171086478	6.943558403	0.004188515	8.326818149	-0.192762897	0.893596248	0.263608426	0.990909337	0.353065505	0.933280125	0.265567069	0.010425749
D074	D	0	0.710284323	73.13502622	78.40918314	2554	51.9466626	247.9655121	0.097089081	2556	0.722477118	-24.44096255	131.0517913	80609620.07	5.43319094	88.4856002	2.336268334	227.7516377	48.30776339	50.50140567	43.96195497	-54.2445881	281.9962258	36.46250873	355.1755061	0.279314756	322438480.3	0.025237497	3298.404793	549.504824	21.10643828	502420.1115	3187.380472	467.6670492	51.61051314	0.800546898	5.580897452	3.839609981	18.80344222	0.002024919	9.185666594	-0.303909186	0.980000295	0.170087292	0.984929057	0.261627404	0.915250162	0.179141216	0.005689717
D075	D	0	0.630757607	139.3459487	142.4359505	9374	87.89351717	392.5340546	0.041874766	9376	0.874359567	66.57126335	176.3211858	414448272.2	5.092424107	54.34432983	4.767247888	352.495509	34.73257577	118.0062463	110.3258655	4.351038091	348.144471	22.73496267	420.4906691	1.032080494	1657793089	0.036169612	2083.180849	623.0113114	23.97563722	326705.9193	4351.283599	261.1455643	68.42701796	0.584936745	6.271845671	4.069751088	27.59741422	0.001951689	9.478839347	-0.135211668	0.85286085	0.157776266	0.987127453	0.248192969	0.922941654	0.16586326	0.006153987
D076	D	0	0.816151939	144.9951865	144.9965517	13434	118.3381025	436.6173157	0.032500917	13436	0.94103689	-41.53631706	192.6206048	494541448.9	5.861504912	136.7351083	6.40502366	669.6643709	77.79268421	70.30936475	52.35138275	-50.71682935	720.3812002	55.40108496	383.7040176	1.404134303	1978165795	0.025093857	10099.74749	988.1625224	25.49703805	13939386.88	78861.01583	1487.283086	135.0417137	0.83354619	8.157801241	4.502155653	66.04667526	0.004014236	10.27233261	-0.246533233	0.969965409	0.179139099	0.993821463	0.257556073	0.949252371	0.138421037	0.053952272
D077	D	0	0.950643133	74.11024998	84.40379138	3934	70.45240025	258.5929291	0.065732824	3936	0.859815885	-38.15382822	54.29820193	93445101.66	4.645792197	53.29562232	4.527113127	181.0639342	29.90420295	5.857151078	0.299507869	-46.62485028	227.6887845	21.60721433	308.1631617	1.028934233	373780406.6	0.046299739	1415.93734	170.763977	11.37368814	165651.7683	2759.675517	192.5084896	26.90515653	0.753967976	3.838626179	3.401608526	11.21578783	0.005241441	8.222809449	-0.215733799	0.916196951	0.258142895	0.988414801	0.345722221	0.928489195	0.242394429	0.028772756
D078	D	0	0.421614113	134.8753572	127.2792206	5790	56.86535405	345.6223664	0.059692982	5792	0.780445129	-22.42979881	93.21772865	162238140.4	5.151321903	56.95256001	4.663428337	236.4216161	36.71611984	31.15707615	24.03702214	-50.99520222	287.4168183	23.61006158	334.7281205	1.07666926	648952561.6	0.033935167	2377.905562	364.4379033	17.25408845	467350.0032	5877.830687	309.2659221	42.4488873	0.757304019	4.941043338	3.769453985	17.58342346	0.002318945	9.167324019	-0.203230675	0.932321416	0.198062821	0.988343377	0.288935572	0.926498283	0.205090458	0.007955898
D079	D	0	0.436712596	100.3020004	99.959992	3418	43.80314696	252.9360749	0.074001192	3420	0.819370241	14.17324054	110.2010886	112301758	4.874752202	44.09416153	14.29303131	404.0014003	33.36635427	58.87601656	47.75841811	-34.32944305	438.3308434	19.62755332	362.4183844	2.675990621	449207031.8	0.044525153	2555.090072	446.9429644	19.13243641	2058371.748	20194.7775	370.7633181	47.19516279	0.774665925	4.744987797	3.645043644	23.25085129	0.00378817	8.562977279	-0.23859758	0.942515036	0.214300815	0.994208321	0.305309918	0.951234667	0.221286506	0.015710401
D080	D	0	0.672486818	81.81766474	86.092973	3526	55.02130103	230.9949494	0.065511897	3528	0.911262716	-0.388259972	113.7082662	109620817.7	5.055947709	60.58647961	8.292243332	371.0328562	38.71010326	48.71629256	36.31853904	-31.29184433	402.3247005	25.39857163	352.5431057	1.766062424	438483270.9	0.037641209	2683.588709	355.185115	16.60947854	952252.5959	11197.2151	348.5059809	31.32197212	0.83262714	4.18610219	3.493131262	12.94344491	0.003468304	8.656142713	-0.266055148	0.960871158	0.224786517	0.995442281	0.31641621	0.953085537	0.231455368	0.012206341
D081	D	0	0.572201531	97.67134512	100.4390362	4198	55.88769325	270.7939392	0.064505464	4200	0.848178402	-46.92597783	53.34257651	97278237.6	4.779452858	54.27927616	7.935335572	261.8676923	32.12637147	1.369266444	-4.434116098	-53.62171355	315.4894058	22.40111424	304.3779568	1.555145116	389112950.4	0.042760998	1822.50581	183.1335274	11.49088179	482859.3776	5912.973988	240.3193129	35.96956417	0.737703169	4.483981014	3.625985182	15.12498416	0.00393218	8.577030844	-0.192844366	0.908991866	0.226163038	0.99154176	0.314610706	0.937454447	0.220411139	0.02123255
D083	D	0	0.714418632	81.76350883	82.21921916	3678	58.41337409	237.3380951	0.064529118	3680	0.905822996	71.50588462	228.9424857	189512339.2	5.626109989	75.08475215	7.696266702	557.4346675	52.37117448	148.062758	137.8223773	-47.71081612	605.1454837	33.17426952	453.8630553	1.452136116	758049356.6	0.02548913	5231.437885	1718.823001	39.81400792	3927729.013	27908.39515	684.4427919	149.7864725	0.641184744	8.99098971	4.548949939	66.82099079	0.001458262	9.721746195	-0.267476179	0.974358525	0.114388193	0.990453677	0.198739824	0.934721816	0.12652184	0.005268823
D092	D	0	0.9303353	117.4548729	127.6244491	9802	109.2724144	390.5929291	0.039848289	9804	0.898541011	-32.16059211	42.40249848	228709474.9	4.614478089	38.94780938	12.26696393	263.1353534	25.25950868	3.372525356	-2.728676798	-72.53023936	335.6655928	16.14855379	305.4713068	2.116672169	914837899.5	0.050762884	1277.830111	300.8950391	16.04724976	414836.6115	5450.271329	188.8456407	15.32610362	0.849698046	2.719498223	2.941533362	7.597182902	0.005588041	8.040791951	-0.252217965	0.9424301	0.322852892	0.996804125	0.404666732	0.962904654	0.323429977	0.013757316
[truncated: 417 more columns]
