# Supplementary material for: Predicting central lymph node metastasis in patients with papillary thyroid carcinoma based on ultrasound radiomic and morphological features analysis
Source: BMC Med Imaging. 2023 Aug 24;23:111. doi: 10.1186/s12880-023-01085-4 (PMC10463837; doi:10.1186/s12880-023-01085-4)
Supplement: Supplementary file 4 — Supplementary Material 4 [file 12880_2023_1085_MOESM4_ESM.xls]

## Sheet: Sheet1
train_id	group	sex	age	position	size	shape	boundary	blood	calcification
A001	1	1	49	1	1.6	2	3	1	1
A002	1	2	37	1	1.5	2	3	1	0
A005	1	2	24	3	0.9	2	2	0	1
A007	1	2	50	2	0.9	2	1	1	1
A011	1	2	48	2	0.37	2	3	0	1
A013	1	2	46	2	0.52	1	2	1	0
A015	1	2	50	2	0.8	2	2	0	1
A016	1	1	50	1	0.95	2	3	0	1
A017	1	2	59	3	0.52	1	2	0	0
A018	1	2	29	3	1.3	2	3	2	1
A019	1	2	34	2	1.1	2	3	0	1
A021	1	2	46	3	1.3	2	3	1	1
A025	1	2	36	3	0.92	2	3	2	1
A028	1	1	58	3	0.73	2	3	1	0
A030	1	2	36	1	0.77	2	2	2	1
A032	1	2	46	2	0.61	1	1	1	1
A035	1	2	55	3	0.62	2	3	1	1
A036	1	1	33	3	0.42	1	2	1	1
A037	1	2	52	3	0.6	2	3	1	1
A039	1	2	44	3	1.5	1	1	2	1
A040	1	2	41	2	0.33	1	2	1	1
A041	1	2	41	1	1.36	2	3	1	0
A042	1	2	51	3	1.6	1	1	0	0
A043	1	2	46	1	1.4	2	3	0	1
A043_1	1	2	46	2	0.9	2	2	0	1
A044	1	1	30	1	0.7	1	2	1	1
A045	1	2	44	2	0.54	2	3	1	0
A046	1	2	48	1	0.7	2	2	1	1
A046_1	1	2	48	2	0.7	1	1	1	1
A047	1	2	48	1	0.7	2	2	1	0
A048	1	2	53	2	1	2	2	2	1
A049	1	2	25	3	1	2	3	2	1
A050	1	2	58	2	0.29	1	2	2	1
A051	1	2	35	3	2.1	2	3	2	1
A052	1	2	29	2	1.7	2	2	2	1
A053	1	1	39	3	0.68	1	1	2	0
A054	1	2	52	1	1.1	2	2	1	1
A055	1	2	25	3	0.9	2	3	2	1
A056	1	2	55	2	2.6	2	2	1	0
A057	1	2	66	1	0.5	2	2	1	0
A059	1	2	29	3	0.46	2	1	1	1
B001	0	2	49	2	0.5	1	1	2	0
B002	0	2	34	1	1.3	2	2	1	1
B003	0	2	31	3	0.42	1	1	0	0
B004	0	2	41	1	0.23	1	3	0	0
B005	0	2	44	2	0.68	1	1	0	0
B006	0	2	47	2	0.23	1	1	0	0
B008	0	2	50	2	0.6	2	1	0	0
B009	0	2	50	1	0.34	1	1	0	1
B010	0	2	51	3	0.41	2	2	0	0
B012	0	2	32	2	0.7	1	3	0	1
B013	0	2	36	1	0.95	2	2	1	0
B016	0	2	49	1	0.5	1	1	0	1
B017	0	2	51	1	0.4	2	3	2	1
B018	0	2	35	3	0.5	1	1	0	0
B021	0	1	46	3	0.4	2	2	2	1
B023	0	2	34	2	0.5	1	1	0	0
B024	0	2	49	2	2.2	2	2	3	1
B026	0	2	42	1	0.56	1	2	0	1
B027	0	2	33	2	0.4	1	1	0	1
B029	0	2	37	2	0.58	1	1	0	0
B031	0	2	32	2	0.66	1	3	0	0
B033	0	2	29	3	0.6	2	1	0	1
B036	0	1	49	2	0.61	2	1	0	0
B038	0	2	44	1	0.68	1	2	0	0
B039	0	2	49	2	1.2	1	2	2	0
B041	0	1	45	3	0.8	2	1	1	0
B042	0	2	28	2	1.2	2	2	3	1
B043	0	2	55	3	0.77	1	2	0	0
B044	0	2	30	2	0.28	2	2	0	0
B046	0	2	48	3	0.5	1	1	2	0
B048	0	2	41	1	1.2	2	2	1	0
B049	0	2	33	1	0.76	1	1	1	0
B050	0	2	45	3	0.22	2	2	0	0
B051	0	2	45	2	0.4	1	1	0	0
B052	0	2	35	2	0.34	1	3	0	1
B053	0	2	54	2	0.53	1	1	0	0
B054	0	2	53	3	0.92	1	2	0	1
B055	0	2	48	3	0.35	1	3	2	0
B058	0	2	51	3	0.7	1	3	0	1
B059	0	2	51	1	0.6	1	2	0	1
B060	0	1	35	2	0.62	1	3	1	1
B061	0	2	49	3	0.35	1	1	0	0
F001	0	2	30	1	0.57	1	2	1	0
F002	0	2	32	1	1	2	3	0	1
F003	0	2	45	3	0.45	1	3	0	1
F004	0	2	47	2	0.55	1	2	0	0
F006	0	2	51	1	1.4	1	1	0	1
F007	0	2	51	2	0.33	2	2	1	1
F008	0	2	43	2	2.7	2	1	3	1
F009	0	2	37	2	1.8	2	2	2	0
F011	0	2	54	2	1.8	2	1	2	1
F014	0	2	46	3	0.34	1	2	2	1
F016	0	2	33	3	0.6	2	1	0	1
F017	0	2	53	3	0.56	1	2	2	0
F019	0	2	44	3	1.5	2	1	0	0
F020	0	2	32	3	0.35	1	1	0	0
F021	0	2	33	2	0.47	1	2	0	1
F022	0	2	55	3	0.4	2	1	0	1
F025	0	2	55	1	0.81	2	2	3	1
F026	0	2	47	3	0.44	1	2	1	0
F027	0	2	49	1	0.84	2	3	0	1
F028	0	2	37	3	0.44	1	2	1	1
F030	0	2	42	1	0.28	1	1	0	1
F033	0	2	72	3	0.72	1	2	2	1
F036	0	2	48	3	0.5	1	1	2	1
F037	0	2	24	2	0.37	2	1	0	1
F038	0	2	66	1	0.66	1	2	1	0
F039	0	2	46	3	0.55	1	1	0	1
F040	0	2	55	2	0.7	2	3	0	1
F042	0	2	47	1	0.8	1	1	0	1
F043	0	2	57	3	0.8	2	2	0	1
F044	0	1	35	2	0.9	1	2	1	0
F045	0	2	26	3	0.63	2	2	0	1
F048	0	2	49	3	0.45	1	2	0	0
F049	0	2	25	1	0.8	1	2	0	1
F050	0	2	57	1	0.6	1	1	3	1
F051	0	2	57	1	0.8	2	1	0	1
F052	0	2	40	3	0.61	1	1	1	1
F053	0	2	55	2	0.42	2	2	0	1
F054	0	2	36	1	0.38	1	2	1	0
F056	0	2	22	2	0.82	2	3	2	1
F061	0	2	50	2	0.68	2	2	2	1
F062	0	1	51	2	1.1	1	2	2	1
F063	0	2	56	3	0.48	2	2	0	0
F064	0	2	56	1	0.33	1	3	0	1
F065	0	2	47	3	0.9	1	1	1	1
F069	0	2	47	3	0.73	2	2	2	1
F071	0	2	44	3	1.7	2	3	3	1
F072	0	2	29	3	0.8	2	3	1	1
F073	0	2	43	3	0.7	1	2	2	1
F074	0	2	43	3	0.62	2	3	0	1
F075	0	2	43	3	0.37	1	1	0	1
F081	0	1	35	2	2.2	2	1	2	0
F082	0	2	25	3	0.61	2	2	0	1
F083	0	2	38	2	0.56	1	3	1	1
F084	0	2	49	2	0.4	1	1	0	0
F086	0	2	34	1	1.5	2	1	3	1
Y001	1	1	47	3	1.7	2	3	2	1
Y002	1	2	35	2	0.62	2	3	2	1
Y005	1	2	52	3	1.9	2	1	0	1
Y006	1	2	46	2	1.3	2	2	1	1
Y008	1	1	53	2	0.43	2	1	1	0
Y009	1	1	54	3	3.1	2	2	1	1
Y010	1	1	54	1	1.5	1	1	1	1
Y011	1	2	53	2	1.7	2	2	2	1
Y012	1	1	51	3	1.2	2	3	1	1
Y013	1	2	44	2	3.3	2	3	2	1
Y014	1	2	59	2	0.5	2	2	0	1
Y015	1	2	50	3	0.9	2	3	2	1
Y016	1	2	46	2	0.65	2	3	3	1
Y017	1	2	41	3	0.6	2	2	2	1
Y019	1	2	33	2	0.7	1	3	0	1
Y020	1	2	26	2	1.2	1	2	1	1
Y021	1	2	24	3	3.1	2	3	3	1
Y022	1	2	40	3	1.8	2	3	2	1
Y023	1	2	49	3	1.2	2	2	1	1
Y024	1	2	21	2	3.4	2	3	3	1
Y024_1	1	2	21	3	1.9	2	3	3	1
Y025	1	2	28	3	1.3	2	3	2	1
Y026	1	2	31	2	1.2	2	2	0	1
Y027	1	1	35	3	1.4	2	3	3	1
Y027_1	1	1	35	1	1	2	3	1	1
Y029	1	2	39	3	0.85	1	3	2	0
Y030	1	2	67	3	2.5	2	2	2	1
Y031	1	1	51	2	1.4	2	3	3	1
Y032	1	2	39	1	1	2	1	1	1
Y033	1	1	50	2	0.78	2	3	1	1
Y034	1	2	26	3	0.63	2	2	0	1
Y036	1	2	44	1	1.1	2	3	1	1
Y039	1	2	45	1	1.3	2	2	2	1
Y040	1	2	73	3	0.92	2	2	2	1
Y041	1	2	48	3	1.1	2	3	3	1
Y043	1	1	47	3	1.7	2	3	2	1
Y044	1	2	20	3	2.4	2	1	3	1
Y045	1	2	51	2	0.66	2	3	2	1
Y046	1	2	48	2	1.3	2	3	3	1
Y047	1	1	27	2	0.62	2	3	1	1
Y049	1	2	55	1	0.7	2	1	1	1
Y050	1	2	44	2	1	1	2	1	1
Y051	1	2	47	2	1.6	2	2	2	0
Y052	1	2	29	2	1.2	2	3	3	1
Y053	1	2	51	2	0.52	2	2	3	0
Y055	1	2	30	1	1.1	2	3	0	1
Y056	1	1	29	2	1.9	2	3	2	1
Y057	1	2	47	2	2.2	2	3	2	1
Y058	1	2	27	3	1	2	2	2	1
Y059	1	2	30	3	1.3	2	3	2	1
Y060	1	1	46	2	1.4	2	3	2	1
Y064	1	2	26	3	2.5	2	3	2	1
Y069	1	1	66	2	0.8	2	3	1	1
Y070	1	2	39	3	0.7	2	3	1	1
Y071	1	2	53	2	0.82	2	1	2	0
Y072	1	1	64	2	0.64	2	3	0	1
Y073	1	2	23	2	0.92	2	3	1	1
Y074	1	2	54	3	0.53	1	1	1	0
Y077	1	2	45	3	0.45	1	2	0	1
Y078	1	2	53	1	0.7	1	1	1	1
Y079	1	2	70	3	2.3	2	2	1	1
Y080	1	2	31	3	0.61	2	1	1	1
Y081	1	2	33	3	1.1	2	1	2	0
Y083	1	2	36	1	0.54	2	2	1	0
Y084	1	2	24	3	3.5	2	2	3	1
Y085	1	2	58	1	1.2	2	3	2	1
Y086	1	2	47	2	0.35	2	1	0	0
Y087	1	2	30	3	0.48	2	2	0	0
Y089	1	2	48	3	1.5	2	2	1	1
Y090	1	2	53	2	0.7	2	3	1	0
Y091	1	2	54	3	0.47	1	2	0	1
Y092	1	2	48	2	1.1	2	3	2	0
Y093	1	2	28	3	0.19	2	2	0	0
Y097	1	2	25	1	2.7	2	2	2	1
